# Supplementary material for: Meta-analysis reveals that seed-applied neonicotinoids and pyrethroids have similar negative effects on abundance of arthropod natural enemies
Source: PeerJ. 2016 Dec 7;4:e2776. doi: 10.7717/peerj.2776 (PMC5147019; doi:10.7717/peerj.2776)
Supplement: Data S1 — This excel file contains datasets and associated metadata underlying a meta-analysis of the influence of seed-applied neonicotinoids on natural enemies of crop pests. [file peerj-04-2776-s001.xlsx]

## Sheet: No Insecticide Control
id	article_id	study	authors	publication_year	journal	citation	title	author_affiliation	funding_source	peer_reviewed	country	continent	study_type	data_source	data_did_we_calc	data_calc_explanation	data_graphs	crop_species	crop_group	neonic_active_ingr	neonic_group	rate_g_kg_seed	rate_mg_seed	variety	variety_transgenic	variety_transgenic_Bt	variety_transgenic_HT	field_location	state_or_region	site_number	year_of_data	site_yr_ID	data_location	cultivation	plot_size	plot_size_explanation	is_plot_size_avg	was_study_randomized	study_design	planting_date	first_sample	last_sample	sampling_duration_days	duration_notes	early_sampling	early_samp_prop	number_of_samples	control_type	insecticide_name
1	1	Albajes2003	Albajes, R., C. Lopez, and X. Pons	2003	Journal of Economic Entomology	96(6): 1805-1813	Predatory fauna in cornfields and response to imidacloprid seed treatment	public	government	yes	Spain	Europe	field	study	no	na	no	maize	maize	IMI	IMI	4.9	na	Aligreen (Aventis)	not specified	na	na	35 km west of Lleida	Catalonia	1	1997	Albajes2003-1-1997	Table 2	planted with a "conventional drill", sprayed with herbicide two days after planting (alachlor + atrazine)	7000	plot size varied from one year to another from 0.4 to 1 ha, but they were uniform within the same year	yes	yes	randomized complete block	1997-04-30	na	na	na	sampled throughout the season; weekly for pitfalls and with less frequency for visual assessments	yes	0.2	11	no insecticide	na
2	1	Albajes2003	Albajes, R., C. Lopez, and X. Pons	2003	Journal of Economic Entomology	96(6): 1805-1813	Predatory fauna in cornfields and response to imidacloprid seed treatment	public	government	yes	Spain	Europe	field	study	no	na	no	maize	maize	IMI	IMI	4.9	na	Aligreen (Aventis)	not specified	na	na	35 km west of Lleida	Catalonia	1	1997	Albajes2003-1-1997	Table 2	planted with a "conventional drill", sprayed with herbicide two days after planting (alachlor + atrazine)	7000	plot size varied from one year to another from 0.4 to 1 ha, but they were uniform within the same year	yes	yes	randomized complete block	1997-04-30	na	na	na	sampled throughout the season; weekly for pitfalls and with less frequency for visual assessments	yes	0.2	11	no insecticide	na
3	1	Albajes2003	Albajes, R., C. Lopez, and X. Pons	2003	Journal of Economic Entomology	96(6): 1805-1813	Predatory fauna in cornfields and response to imidacloprid seed treatment	public	government	yes	Spain	Europe	field	study	no	na	no	maize	maize	IMI	IMI	4.9	na	Aligreen (Aventis)	not specified	na	na	35 km west of Lleida	Catalonia	1	1997	Albajes2003-1-1997	Table 2	planted with a "conventional drill", sprayed with herbicide two days after planting (alachlor + atrazine)	7000	plot size varied from one year to another from 0.4 to 1 ha, but they were uniform within the same year	yes	yes	randomized complete block	1997-04-30	na	na	na	sampled throughout the season; weekly for pitfalls and with less frequency for visual assessments	yes	0.2	11	no insecticide	na
4	1	Albajes2003	Albajes, R., C. Lopez, and X. Pons	2003	Journal of Economic Entomology	96(6): 1805-1813	Predatory fauna in cornfields and response to imidacloprid seed treatment	public	government	yes	Spain	Europe	field	study	no	na	no	maize	maize	IMI	IMI	4.9	na	Aligreen (Aventis)	not specified	na	na	35 km west of Lleida	Catalonia	1	1997	Albajes2003-1-1997	Table 2	planted with a "conventional drill", sprayed with herbicide two days after planting (alachlor + atrazine)	7000	plot size varied from one year to another from 0.4 to 1 ha, but they were uniform within the same year	yes	yes	randomized complete block	1997-04-30	na	na	na	sampled throughout the season; weekly for pitfalls and with less frequency for visual assessments	yes	0.2	11	no insecticide	na
5	1	Albajes2003	Albajes, R., C. Lopez, and X. Pons	2003	Journal of Economic Entomology	96(6): 1805-1813	Predatory fauna in cornfields and response to imidacloprid seed treatment	public	government	yes	Spain	Europe	field	study	no	na	no	maize	maize	IMI	IMI	4.9	na	Aligreen (Aventis)	not specified	na	na	35 km west of Lleida	Catalonia	1	1997	Albajes2003-1-1997	Table 2	planted with a "conventional drill", sprayed with herbicide two days after planting (alachlor + atrazine)	7000	plot size varied from one year to another from 0.4 to 1 ha, but they were uniform within the same year	yes	yes	randomized complete block	1997-04-30	na	na	na	sampled throughout the season; weekly for pitfalls and with less frequency for visual assessments	yes	0.2	11	no insecticide	na
6	1	Albajes2003	Albajes, R., C. Lopez, and X. Pons	2003	Journal of Economic Entomology	96(6): 1805-1813	Predatory fauna in cornfields and response to imidacloprid seed treatment	public	government	yes	Spain	Europe	field	study	no	na	no	maize	maize	IMI	IMI	4.9	na	Aligreen (Aventis)	not specified	na	na	35 km west of Lleida	Catalonia	1	1997	Albajes2003-1-1997	Table 2	planted with a "conventional drill", sprayed with herbicide two days after planting (alachlor + atrazine)	7000	plot size varied from one year to another from 0.4 to 1 ha, but they were uniform within the same year	yes	yes	randomized complete block	1997-04-30	na	na	na	sampled throughout the season; weekly for pitfalls and with less frequency for visual assessments	yes	0.2	11	no insecticide	na
7	1	Albajes2003	Albajes, R., C. Lopez, and X. Pons	2003	Journal of Economic Entomology	96(6): 1805-1813	Predatory fauna in cornfields and response to imidacloprid seed treatment	public	government	yes	Spain	Europe	field	study	no	na	no	maize	maize	IMI	IMI	4.9	na	Aligreen (Aventis)	not specified	na	na	35 km west of Lleida	Catalonia	2	1998	Albajes2003-2-1998	Table 2	planted with a "conventional drill", sprayed with herbicide two days after planting (alachlor + atrazine)	7000	plot size varied from one year to another from 0.4 to 1 ha, but they were uniform within the same year	yes	yes	randomized complete block	1998-05-09	na	na	na	sampled throughout the season; weekly for pitfalls and with less frequency for visual assessments	yes	0.2	11	no insecticide	na
8	1	Albajes2003	Albajes, R., C. Lopez, and X. Pons	2003	Journal of Economic Entomology	96(6): 1805-1813	Predatory fauna in cornfields and response to imidacloprid seed treatment	public	government	yes	Spain	Europe	field	study	no	na	no	maize	maize	IMI	IMI	4.9	na	Aligreen (Aventis)	not specified	na	na	35 km west of Lleida	Catalonia	2	1998	Albajes2003-2-1998	Table 2	planted with a "conventional drill", sprayed with herbicide two days after planting (alachlor + atrazine)	7000	plot size varied from one year to another from 0.4 to 1 ha, but they were uniform within the same year	yes	yes	randomized complete block	1998-05-09	na	na	na	sampled throughout the season; weekly for pitfalls and with less frequency for visual assessments	yes	0.2	11	no insecticide	na
9	1	Albajes2003	Albajes, R., C. Lopez, and X. Pons	2003	Journal of Economic Entomology	96(6): 1805-1813	Predatory fauna in cornfields and response to imidacloprid seed treatment	public	government	yes	Spain	Europe	field	study	no	na	no	maize	maize	IMI	IMI	4.9	na	Aligreen (Aventis)	not specified	na	na	35 km west of Lleida	Catalonia	2	1998	Albajes2003-2-1998	Table 2	planted with a "conventional drill", sprayed with herbicide two days after planting (alachlor + atrazine)	7000	plot size varied from one year to another from 0.4 to 1 ha, but they were uniform within the same year	yes	yes	randomized complete block	1998-05-09	na	na	na	sampled throughout the season; weekly for pitfalls and with less frequency for visual assessments	yes	0.2	11	no insecticide	na
10	1	Albajes2003	Albajes, R., C. Lopez, and X. Pons	2003	Journal of Economic Entomology	96(6): 1805-1813	Predatory fauna in cornfields and response to imidacloprid seed treatment	public	government	yes	Spain	Europe	field	study	no	na	no	maize	maize	IMI	IMI	4.9	na	Aligreen (Aventis)	not specified	na	na	35 km west of Lleida	Catalonia	2	1998	Albajes2003-2-1998	Table 2	planted with a "conventional drill", sprayed with herbicide two days after planting (alachlor + atrazine)	7000	plot size varied from one year to another from 0.4 to 1 ha, but they were uniform within the same year	yes	yes	randomized complete block	1998-05-09	na	na	na	sampled throughout the season; weekly for pitfalls and with less frequency for visual assessments	yes	0.2	11	no insecticide	na
11	1	Albajes2003	Albajes, R., C. Lopez, and X. Pons	2003	Journal of Economic Entomology	96(6): 1805-1813	Predatory fauna in cornfields and response to imidacloprid seed treatment	public	government	yes	Spain	Europe	field	study	no	na	no	maize	maize	IMI	IMI	4.9	na	Aligreen (Aventis)	not specified	na	na	35 km west of Lleida	Catalonia	2	1998	Albajes2003-2-1998	Table 2	planted with a "conventional drill", sprayed with herbicide two days after planting (alachlor + atrazine)	7000	plot size varied from one year to another from 0.4 to 1 ha, but they were uniform within the same year	yes	yes	randomized complete block	1998-05-09	na	na	na	sampled throughout the season; weekly for pitfalls and with less frequency for visual assessments	yes	0.2	11	no insecticide	na
12	1	Albajes2003	Albajes, R., C. Lopez, and X. Pons	2003	Journal of Economic Entomology	96(6): 1805-1813	Predatory fauna in cornfields and response to imidacloprid seed treatment	public	government	yes	Spain	Europe	field	study	no	na	no	maize	maize	IMI	IMI	4.9	na	Aligreen (Aventis)	not specified	na	na	35 km west of Lleida	Catalonia	2	1998	Albajes2003-2-1998	Table 2	planted with a "conventional drill", sprayed with herbicide two days after planting (alachlor + atrazine)	7000	plot size varied from one year to another from 0.4 to 1 ha, but they were uniform within the same year	yes	yes	randomized complete block	1998-05-09	na	na	na	sampled throughout the season; weekly for pitfalls and with less frequency for visual assessments	yes	0.2	11	no insecticide	na
13	1	Albajes2003	Albajes, R., C. Lopez, and X. Pons	2003	Journal of Economic Entomology	96(6): 1805-1813	Predatory fauna in cornfields and response to imidacloprid seed treatment	public	government	yes	Spain	Europe	field	study	no	na	no	maize	maize	IMI	IMI	4.9	na	Aligreen (Aventis)	not specified	na	na	35 km west of Lleida	Catalonia	1	1999	Albajes2003-1-1999	Table 2	planted with a "conventional drill", sprayed with herbicide two days after planting (alachlor + atrazine)	7000	plot size varied from one year to another from 0.4 to 1 ha, but they were uniform within the same year	yes	yes	randomized complete block	1999-05-12	na	na	na	sampled throughout the season; weekly for pitfalls and with less frequency for visual assessments	yes	0.2	11	no insecticide	na
14	1	Albajes2003	Albajes, R., C. Lopez, and X. Pons	2003	Journal of Economic Entomology	96(6): 1805-1813	Predatory fauna in cornfields and response to imidacloprid seed treatment	public	government	yes	Spain	Europe	field	study	no	na	no	maize	maize	IMI	IMI	4.9	na	Aligreen (Aventis)	not specified	na	na	35 km west of Lleida	Catalonia	1	1999	Albajes2003-1-1999	Table 2	planted with a "conventional drill", sprayed with herbicide two days after planting (alachlor + atrazine)	7000	plot size varied from one year to another from 0.4 to 1 ha, but they were uniform within the same year	yes	yes	randomized complete block	1999-05-12	na	na	na	sampled throughout the season; weekly for pitfalls and with less frequency for visual assessments	yes	0.2	11	no insecticide	na
15	1	Albajes2003	Albajes, R., C. Lopez, and X. Pons	2003	Journal of Economic Entomology	96(6): 1805-1813	Predatory fauna in cornfields and response to imidacloprid seed treatment	public	government	yes	Spain	Europe	field	study	no	na	no	maize	maize	IMI	IMI	4.9	na	Aligreen (Aventis)	not specified	na	na	35 km west of Lleida	Catalonia	1	1999	Albajes2003-1-1999	Table 2	planted with a "conventional drill", sprayed with herbicide two days after planting (alachlor + atrazine)	7000	plot size varied from one year to another from 0.4 to 1 ha, but they were uniform within the same year	yes	yes	randomized complete block	1999-05-12	na	na	na	sampled throughout the season; weekly for pitfalls and with less frequency for visual assessments	yes	0.2	11	no insecticide	na
16	1	Albajes2003	Albajes, R., C. Lopez, and X. Pons	2003	Journal of Economic Entomology	96(6): 1805-1813	Predatory fauna in cornfields and response to imidacloprid seed treatment	public	government	yes	Spain	Europe	field	study	no	na	no	maize	maize	IMI	IMI	4.9	na	Aligreen (Aventis)	not specified	na	na	35 km west of Lleida	Catalonia	1	1999	Albajes2003-1-1999	Table 2	planted with a "conventional drill", sprayed with herbicide two days after planting (alachlor + atrazine)	7000	plot size varied from one year to another from 0.4 to 1 ha, but they were uniform within the same year	yes	yes	randomized complete block	1999-05-12	na	na	na	sampled throughout the season; weekly for pitfalls and with less frequency for visual assessments	yes	0.2	11	no insecticide	na
17	1	Albajes2003	Albajes, R., C. Lopez, and X. Pons	2003	Journal of Economic Entomology	96(6): 1805-1813	Predatory fauna in cornfields and response to imidacloprid seed treatment	public	government	yes	Spain	Europe	field	study	no	na	no	maize	maize	IMI	IMI	4.9	na	Aligreen (Aventis)	not specified	na	na	35 km west of Lleida	Catalonia	1	1999	Albajes2003-1-1999	Table 2	planted with a "conventional drill", sprayed with herbicide two days after planting (alachlor + atrazine)	7000	plot size varied from one year to another from 0.4 to 1 ha, but they were uniform within the same year	yes	yes	randomized complete block	1999-05-12	na	na	na	sampled throughout the season; weekly for pitfalls and with less frequency for visual assessments	yes	0.2	11	no insecticide	na
18	1	Albajes2003	Albajes, R., C. Lopez, and X. Pons	2003	Journal of Economic Entomology	96(6): 1805-1813	Predatory fauna in cornfields and response to imidacloprid seed treatment	public	government	yes	Spain	Europe	field	study	no	na	no	maize	maize	IMI	IMI	4.9	na	Aligreen (Aventis)	not specified	na	na	35 km west of Lleida	Catalonia	1	1999	Albajes2003-1-1999	Table 2	planted with a "conventional drill", sprayed with herbicide two days after planting (alachlor + atrazine)	7000	plot size varied from one year to another from 0.4 to 1 ha, but they were uniform within the same year	yes	yes	randomized complete block	1999-05-12	na	na	na	sampled throughout the season; weekly for pitfalls and with less frequency for visual assessments	yes	0.2	11	no insecticide	na
19	1	Albajes2003	Albajes, R., C. Lopez, and X. Pons	2003	Journal of Economic Entomology	96(6): 1805-1813	Predatory fauna in cornfields and response to imidacloprid seed treatment	public	government	yes	Spain	Europe	field	study	no	na	no	maize	maize	IMI	IMI	4.9	na	Dracma (Syngenta)	not specified	na	na	35 km west of Lleida	Catalonia	2	2000	Albajes2003-2-2000	Table 2	planted with a "conventional drill", sprayed with herbicide two days after planting (alachlor + atrazine)	7000	plot size varied from one year to another from 0.4 to 1 ha, but they were uniform within the same year	yes	yes	randomized complete block	2000-05-03	na	na	na	sampled throughout the season; weekly for pitfalls and with less frequency for visual assessments	yes	0.2	6	no insecticide	na
20	1	Albajes2003	Albajes, R., C. Lopez, and X. Pons	2003	Journal of Economic Entomology	96(6): 1805-1813	Predatory fauna in cornfields and response to imidacloprid seed treatment	public	government	yes	Spain	Europe	field	study	no	na	no	maize	maize	IMI	IMI	4.9	na	Dracma (Syngenta)	not specified	na	na	35 km west of Lleida	Catalonia	2	2000	Albajes2003-2-2000	Table 2	planted with a "conventional drill", sprayed with herbicide two days after planting (alachlor + atrazine)	7000	plot size varied from one year to another from 0.4 to 1 ha, but they were uniform within the same year	yes	yes	randomized complete block	2000-05-03	na	na	na	sampled throughout the season; weekly for pitfalls and with less frequency for visual assessments	yes	0.2	6	no insecticide	na
21	1	Albajes2003	Albajes, R., C. Lopez, and X. Pons	2003	Journal of Economic Entomology	96(6): 1805-1813	Predatory fauna in cornfields and response to imidacloprid seed treatment	public	government	yes	Spain	Europe	field	study	no	na	no	maize	maize	IMI	IMI	4.9	na	Dracma (Syngenta)	not specified	na	na	35 km west of Lleida	Catalonia	2	2000	Albajes2003-2-2000	Table 2	planted with a "conventional drill", sprayed with herbicide two days after planting (alachlor + atrazine)	7000	plot size varied from one year to another from 0.4 to 1 ha, but they were uniform within the same year	yes	yes	randomized complete block	2000-05-03	na	na	na	sampled throughout the season; weekly for pitfalls and with less frequency for visual assessments	yes	0.2	6	no insecticide	na
22	1	Albajes2003	Albajes, R., C. Lopez, and X. Pons	2003	Journal of Economic Entomology	96(6): 1805-1813	Predatory fauna in cornfields and response to imidacloprid seed treatment	public	government	yes	Spain	Europe	field	study	no	na	no	maize	maize	IMI	IMI	4.9	na	Dracma (Syngenta)	not specified	na	na	35 km west of Lleida	Catalonia	2	2000	Albajes2003-2-2000	Table 2	planted with a "conventional drill", sprayed with herbicide two days after planting (alachlor + atrazine)	7000	plot size varied from one year to another from 0.4 to 1 ha, but they were uniform within the same year	yes	yes	randomized complete block	2000-05-03	na	na	na	sampled throughout the season; weekly for pitfalls and with less frequency for visual assessments	yes	0.2	6	no insecticide	na
23	1	Albajes2003	Albajes, R., C. Lopez, and X. Pons	2003	Journal of Economic Entomology	96(6): 1805-1813	Predatory fauna in cornfields and response to imidacloprid seed treatment	public	government	yes	Spain	Europe	field	study	no	na	no	maize	maize	IMI	IMI	4.9	na	Dracma (Syngenta)	not specified	na	na	35 km west of Lleida	Catalonia	2	2000	Albajes2003-2-2000	Table 2	planted with a "conventional drill", sprayed with herbicide two days after planting (alachlor + atrazine)	7000	plot size varied from one year to another from 0.4 to 1 ha, but they were uniform within the same year	yes	yes	randomized complete block	2000-05-03	na	na	na	sampled throughout the season; weekly for pitfalls and with less frequency for visual assessments	yes	0.2	6	no insecticide	na
24	1	Albajes2003	Albajes, R., C. Lopez, and X. Pons	2003	Journal of Economic Entomology	96(6): 1805-1813	Predatory fauna in cornfields and response to imidacloprid seed treatment	public	government	yes	Spain	Europe	field	study	no	na	no	maize	maize	IMI	IMI	4.9	na	Dracma (Syngenta)	not specified	na	na	35 km west of Lleida	Catalonia	2	2000	Albajes2003-2-2000	Table 2	planted with a "conventional drill", sprayed with herbicide two days after planting (alachlor + atrazine)	7000	plot size varied from one year to another from 0.4 to 1 ha, but they were uniform within the same year	yes	yes	randomized complete block	2000-05-03	na	na	na	sampled throughout the season; weekly for pitfalls and with less frequency for visual assessments	yes	0.2	6	no insecticide	na
25	1	Albajes2003	Albajes, R., C. Lopez, and X. Pons	2003	Journal of Economic Entomology	96(6): 1805-1813	Predatory fauna in cornfields and response to imidacloprid seed treatment	public	government	yes	Spain	Europe	field	study	no	na	no	maize	maize	IMI	IMI	4.9	na	Dracma (Syngenta)	not specified	na	na	35 km west of Lleida	Catalonia	1	2001	Albajes2003-1-2001	Table 2	planted with a "conventional drill", sprayed with herbicide two days after planting (alachlor + atrazine)	7000	plot size varied from one year to another from 0.4 to 1 ha, but they were uniform within the same year	yes	yes	randomized complete block	2001-04-27	na	na	na	sampled throughout the season; weekly for pitfalls and with less frequency for visual assessments	yes	0.2	5	no insecticide	na
26	1	Albajes2003	Albajes, R., C. Lopez, and X. Pons	2003	Journal of Economic Entomology	96(6): 1805-1813	Predatory fauna in cornfields and response to imidacloprid seed treatment	public	government	yes	Spain	Europe	field	study	no	na	no	maize	maize	IMI	IMI	4.9	na	Dracma (Syngenta)	not specified	na	na	35 km west of Lleida	Catalonia	1	2001	Albajes2003-1-2001	Table 2	planted with a "conventional drill", sprayed with herbicide two days after planting (alachlor + atrazine)	7000	plot size varied from one year to another from 0.4 to 1 ha, but they were uniform within the same year	yes	yes	randomized complete block	2001-04-27	na	na	na	sampled throughout the season; weekly for pitfalls and with less frequency for visual assessments	yes	0.2	5	no insecticide	na
27	1	Albajes2003	Albajes, R., C. Lopez, and X. Pons	2003	Journal of Economic Entomology	96(6): 1805-1813	Predatory fauna in cornfields and response to imidacloprid seed treatment	public	government	yes	Spain	Europe	field	study	no	na	no	maize	maize	IMI	IMI	4.9	na	Dracma (Syngenta)	not specified	na	na	35 km west of Lleida	Catalonia	1	2001	Albajes2003-1-2001	Table 2	planted with a "conventional drill", sprayed with herbicide two days after planting (alachlor + atrazine)	7000	plot size varied from one year to another from 0.4 to 1 ha, but they were uniform within the same year	yes	yes	randomized complete block	2001-04-27	na	na	na	sampled throughout the season; weekly for pitfalls and with less frequency for visual assessments	yes	0.2	5	no insecticide	na
28	1	Albajes2003	Albajes, R., C. Lopez, and X. Pons	2003	Journal of Economic Entomology	96(6): 1805-1813	Predatory fauna in cornfields and response to imidacloprid seed treatment	public	government	yes	Spain	Europe	field	study	no	na	no	maize	maize	IMI	IMI	4.9	na	Dracma (Syngenta)	not specified	na	na	35 km west of Lleida	Catalonia	1	2001	Albajes2003-1-2001	Table 2	planted with a "conventional drill", sprayed with herbicide two days after planting (alachlor + atrazine)	7000	plot size varied from one year to another from 0.4 to 1 ha, but they were uniform within the same year	yes	yes	randomized complete block	2001-04-27	na	na	na	sampled throughout the season; weekly for pitfalls and with less frequency for visual assessments	yes	0.2	5	no insecticide	na
29	1	Albajes2003	Albajes, R., C. Lopez, and X. Pons	2003	Journal of Economic Entomology	96(6): 1805-1813	Predatory fauna in cornfields and response to imidacloprid seed treatment	public	government	yes	Spain	Europe	field	study	no	na	no	maize	maize	IMI	IMI	4.9	na	Dracma (Syngenta)	not specified	na	na	35 km west of Lleida	Catalonia	1	2001	Albajes2003-1-2001	Table 2	planted with a "conventional drill", sprayed with herbicide two days after planting (alachlor + atrazine)	7000	plot size varied from one year to another from 0.4 to 1 ha, but they were uniform within the same year	yes	yes	randomized complete block	2001-04-27	na	na	na	sampled throughout the season; weekly for pitfalls and with less frequency for visual assessments	yes	0.2	5	no insecticide	na
30	1	Albajes2003	Albajes, R., C. Lopez, and X. Pons	2003	Journal of Economic Entomology	96(6): 1805-1813	Predatory fauna in cornfields and response to imidacloprid seed treatment	public	government	yes	Spain	Europe	field	study	no	na	no	maize	maize	IMI	IMI	4.9	na	Dracma (Syngenta)	not specified	na	na	35 km west of Lleida	Catalonia	1	2001	Albajes2003-1-2001	Table 2	planted with a "conventional drill", sprayed with herbicide two days after planting (alachlor + atrazine)	7000	plot size varied from one year to another from 0.4 to 1 ha, but they were uniform within the same year	yes	yes	randomized complete block	2001-04-27	na	na	na	sampled throughout the season; weekly for pitfalls and with less frequency for visual assessments	yes	0.2	5	no insecticide	na
31	1	Albajes2003	Albajes, R., C. Lopez, and X. Pons	2003	Journal of Economic Entomology	96(6): 1805-1813	Predatory fauna in cornfields and response to imidacloprid seed treatment	public	government	yes	Spain	Europe	field	study	no	na	no	maize	maize	IMI	IMI	4.9	na	Dracma (Syngenta)	not specified	na	na	35 km west of Lleida	Catalonia	1	2001	Albajes2003-1-2001	Table 2	planted with a "conventional drill", sprayed with herbicide two days after planting (alachlor + atrazine)	7000	plot size varied from one year to another from 0.4 to 1 ha, but they were uniform within the same year	yes	yes	randomized complete block	2001-04-27	na	na	na	sampled throughout the season; weekly for pitfalls and with less frequency for visual assessments	yes	0.2	5	no insecticide	na
32	1	Albajes2003	Albajes, R., C. Lopez, and X. Pons	2003	Journal of Economic Entomology	96(6): 1805-1813	Predatory fauna in cornfields and response to imidacloprid seed treatment	public	government	yes	Spain	Europe	field	study	no	na	no	maize	maize	IMI	IMI	4.9	na	Aligreen (Aventis)	not specified	na	na	35 km west of Lleida	Catalonia	1	1997	Albajes2003-1-1997	Table 3	planted with a "conventional drill", sprayed with herbicide two days after planting (alachlor + atrazine)	7000	plot size varied from one year to another from 0.4 to 1 ha, but they were uniform within the same year	yes	yes	randomized complete block	1997-04-30	na	na	na	sampled throughout the season; weekly for pitfalls and with less frequency for visual assessments	yes	0.2	na	no insecticide	na
33	1	Albajes2003	Albajes, R., C. Lopez, and X. Pons	2003	Journal of Economic Entomology	96(6): 1805-1813	Predatory fauna in cornfields and response to imidacloprid seed treatment	public	government	yes	Spain	Europe	field	study	no	na	no	maize	maize	IMI	IMI	4.9	na	Aligreen (Aventis)	not specified	na	na	35 km west of Lleida	Catalonia	1	1997	Albajes2003-1-1997	Table 3	planted with a "conventional drill", sprayed with herbicide two days after planting (alachlor + atrazine)	7000	plot size varied from one year to another from 0.4 to 1 ha, but they were uniform within the same year	yes	yes	randomized complete block	1997-04-30	na	na	na	sampled throughout the season; weekly for pitfalls and with less frequency for visual assessments	yes	0.2	na	no insecticide	na
34	1	Albajes2003	Albajes, R., C. Lopez, and X. Pons	2003	Journal of Economic Entomology	96(6): 1805-1813	Predatory fauna in cornfields and response to imidacloprid seed treatment	public	government	yes	Spain	Europe	field	study	no	na	no	maize	maize	IMI	IMI	4.9	na	Aligreen (Aventis)	not specified	na	na	35 km west of Lleida	Catalonia	1	1997	Albajes2003-1-1997	Table 3	planted with a "conventional drill", sprayed with herbicide two days after planting (alachlor + atrazine)	7000	plot size varied from one year to another from 0.4 to 1 ha, but they were uniform within the same year	yes	yes	randomized complete block	1997-04-30	na	na	na	sampled throughout the season; weekly for pitfalls and with less frequency for visual assessments	yes	0.2	na	no insecticide	na
35	1	Albajes2003	Albajes, R., C. Lopez, and X. Pons	2003	Journal of Economic Entomology	96(6): 1805-1813	Predatory fauna in cornfields and response to imidacloprid seed treatment	public	government	yes	Spain	Europe	field	study	no	na	no	maize	maize	IMI	IMI	4.9	na	Aligreen (Aventis)	not specified	na	na	35 km west of Lleida	Catalonia	1	1997	Albajes2003-1-1997	Table 3	planted with a "conventional drill", sprayed with herbicide two days after planting (alachlor + atrazine)	7000	plot size varied from one year to another from 0.4 to 1 ha, but they were uniform within the same year	yes	yes	randomized complete block	1997-04-30	na	na	na	sampled throughout the season; weekly for pitfalls and with less frequency for visual assessments	yes	0.2	na	no insecticide	na
36	1	Albajes2003	Albajes, R., C. Lopez, and X. Pons	2003	Journal of Economic Entomology	96(6): 1805-1813	Predatory fauna in cornfields and response to imidacloprid seed treatment	public	government	yes	Spain	Europe	field	study	no	na	no	maize	maize	IMI	IMI	4.9	na	Aligreen (Aventis)	not specified	na	na	35 km west of Lleida	Catalonia	1	1997	Albajes2003-1-1997	Table 3	planted with a "conventional drill", sprayed with herbicide two days after planting (alachlor + atrazine)	7000	plot size varied from one year to another from 0.4 to 1 ha, but they were uniform within the same year	yes	yes	randomized complete block	1997-04-30	na	na	na	sampled throughout the season; weekly for pitfalls and with less frequency for visual assessments	yes	0.2	na	no insecticide	na
37	1	Albajes2003	Albajes, R., C. Lopez, and X. Pons	2003	Journal of Economic Entomology	96(6): 1805-1813	Predatory fauna in cornfields and response to imidacloprid seed treatment	public	government	yes	Spain	Europe	field	study	no	na	no	maize	maize	IMI	IMI	4.9	na	Aligreen (Aventis)	not specified	na	na	35 km west of Lleida	Catalonia	1	1997	Albajes2003-1-1997	Table 3	planted with a "conventional drill", sprayed with herbicide two days after planting (alachlor + atrazine)	7000	plot size varied from one year to another from 0.4 to 1 ha, but they were uniform within the same year	yes	yes	randomized complete block	1997-04-30	na	na	na	sampled throughout the season; weekly for pitfalls and with less frequency for visual assessments	yes	0.2	na	no insecticide	na
38	1	Albajes2003	Albajes, R., C. Lopez, and X. Pons	2003	Journal of Economic Entomology	96(6): 1805-1813	Predatory fauna in cornfields and response to imidacloprid seed treatment	public	government	yes	Spain	Europe	field	study	no	na	no	maize	maize	IMI	IMI	4.9	na	Aligreen (Aventis)	not specified	na	na	35 km west of Lleida	Catalonia	1	1997	Albajes2003-1-1997	Table 3	planted with a "conventional drill", sprayed with herbicide two days after planting (alachlor + atrazine)	7000	plot size varied from one year to another from 0.4 to 1 ha, but they were uniform within the same year	yes	yes	randomized complete block	1997-04-30	na	na	na	sampled throughout the season; weekly for pitfalls and with less frequency for visual assessments	yes	0.2	na	no insecticide	na
39	1	Albajes2003	Albajes, R., C. Lopez, and X. Pons	2003	Journal of Economic Entomology	96(6): 1805-1813	Predatory fauna in cornfields and response to imidacloprid seed treatment	public	government	yes	Spain	Europe	field	study	no	na	no	maize	maize	IMI	IMI	4.9	na	Aligreen (Aventis)	not specified	na	na	35 km west of Lleida	Catalonia	2	1998	Albajes2003-2-1998	Table 3	planted with a "conventional drill", sprayed with herbicide two days after planting (alachlor + atrazine)	7000	plot size varied from one year to another from 0.4 to 1 ha, but they were uniform within the same year	yes	yes	randomized complete block	1998-05-09	na	na	na	sampled throughout the season; weekly for pitfalls and with less frequency for visual assessments	yes	0.2	na	no insecticide	na
40	1	Albajes2003	Albajes, R., C. Lopez, and X. Pons	2003	Journal of Economic Entomology	96(6): 1805-1813	Predatory fauna in cornfields and response to imidacloprid seed treatment	public	government	yes	Spain	Europe	field	study	no	na	no	maize	maize	IMI	IMI	4.9	na	Aligreen (Aventis)	not specified	na	na	35 km west of Lleida	Catalonia	2	1998	Albajes2003-2-1998	Table 3	planted with a "conventional drill", sprayed with herbicide two days after planting (alachlor + atrazine)	7000	plot size varied from one year to another from 0.4 to 1 ha, but they were uniform within the same year	yes	yes	randomized complete block	1998-05-09	na	na	na	sampled throughout the season; weekly for pitfalls and with less frequency for visual assessments	yes	0.2	na	no insecticide	na
41	1	Albajes2003	Albajes, R., C. Lopez, and X. Pons	2003	Journal of Economic Entomology	96(6): 1805-1813	Predatory fauna in cornfields and response to imidacloprid seed treatment	public	government	yes	Spain	Europe	field	study	no	na	no	maize	maize	IMI	IMI	4.9	na	Aligreen (Aventis)	not specified	na	na	35 km west of Lleida	Catalonia	2	1998	Albajes2003-2-1998	Table 3	planted with a "conventional drill", sprayed with herbicide two days after planting (alachlor + atrazine)	7000	plot size varied from one year to another from 0.4 to 1 ha, but they were uniform within the same year	yes	yes	randomized complete block	1998-05-09	na	na	na	sampled throughout the season; weekly for pitfalls and with less frequency for visual assessments	yes	0.2	na	no insecticide	na
42	1	Albajes2003	Albajes, R., C. Lopez, and X. Pons	2003	Journal of Economic Entomology	96(6): 1805-1813	Predatory fauna in cornfields and response to imidacloprid seed treatment	public	government	yes	Spain	Europe	field	study	no	na	no	maize	maize	IMI	IMI	4.9	na	Aligreen (Aventis)	not specified	na	na	35 km west of Lleida	Catalonia	2	1998	Albajes2003-2-1998	Table 3	planted with a "conventional drill", sprayed with herbicide two days after planting (alachlor + atrazine)	7000	plot size varied from one year to another from 0.4 to 1 ha, but they were uniform within the same year	yes	yes	randomized complete block	1998-05-09	na	na	na	sampled throughout the season; weekly for pitfalls and with less frequency for visual assessments	yes	0.2	na	no insecticide	na
43	1	Albajes2003	Albajes, R., C. Lopez, and X. Pons	2003	Journal of Economic Entomology	96(6): 1805-1813	Predatory fauna in cornfields and response to imidacloprid seed treatment	public	government	yes	Spain	Europe	field	study	no	na	no	maize	maize	IMI	IMI	4.9	na	Aligreen (Aventis)	not specified	na	na	35 km west of Lleida	Catalonia	2	1998	Albajes2003-2-1998	Table 3	planted with a "conventional drill", sprayed with herbicide two days after planting (alachlor + atrazine)	7000	plot size varied from one year to another from 0.4 to 1 ha, but they were uniform within the same year	yes	yes	randomized complete block	1998-05-09	na	na	na	sampled throughout the season; weekly for pitfalls and with less frequency for visual assessments	yes	0.2	na	no insecticide	na
44	1	Albajes2003	Albajes, R., C. Lopez, and X. Pons	2003	Journal of Economic Entomology	96(6): 1805-1813	Predatory fauna in cornfields and response to imidacloprid seed treatment	public	government	yes	Spain	Europe	field	study	no	na	no	maize	maize	IMI	IMI	4.9	na	Aligreen (Aventis)	not specified	na	na	35 km west of Lleida	Catalonia	2	1998	Albajes2003-2-1998	Table 3	planted with a "conventional drill", sprayed with herbicide two days after planting (alachlor + atrazine)	7000	plot size varied from one year to another from 0.4 to 1 ha, but they were uniform within the same year	yes	yes	randomized complete block	1998-05-09	na	na	na	sampled throughout the season; weekly for pitfalls and with less frequency for visual assessments	yes	0.2	na	no insecticide	na
45	1	Albajes2003	Albajes, R., C. Lopez, and X. Pons	2003	Journal of Economic Entomology	96(6): 1805-1813	Predatory fauna in cornfields and response to imidacloprid seed treatment	public	government	yes	Spain	Europe	field	study	no	na	no	maize	maize	IMI	IMI	4.9	na	Aligreen (Aventis)	not specified	na	na	35 km west of Lleida	Catalonia	1	1999	Albajes2003-1-1999	Table 3	planted with a "conventional drill", sprayed with herbicide two days after planting (alachlor + atrazine)	7000	plot size varied from one year to another from 0.4 to 1 ha, but they were uniform within the same year	yes	yes	randomized complete block	1999-05-12	na	na	na	sampled throughout the season; weekly for pitfalls and with less frequency for visual assessments	yes	0.2	na	no insecticide	na
46	1	Albajes2003	Albajes, R., C. Lopez, and X. Pons	2003	Journal of Economic Entomology	96(6): 1805-1813	Predatory fauna in cornfields and response to imidacloprid seed treatment	public	government	yes	Spain	Europe	field	study	no	na	no	maize	maize	IMI	IMI	4.9	na	Aligreen (Aventis)	not specified	na	na	35 km west of Lleida	Catalonia	1	1999	Albajes2003-1-1999	Table 3	planted with a "conventional drill", sprayed with herbicide two days after planting (alachlor + atrazine)	7000	plot size varied from one year to another from 0.4 to 1 ha, but they were uniform within the same year	yes	yes	randomized complete block	1999-05-12	na	na	na	sampled throughout the season; weekly for pitfalls and with less frequency for visual assessments	yes	0.2	na	no insecticide	na
47	1	Albajes2003	Albajes, R., C. Lopez, and X. Pons	2003	Journal of Economic Entomology	96(6): 1805-1813	Predatory fauna in cornfields and response to imidacloprid seed treatment	public	government	yes	Spain	Europe	field	study	no	na	no	maize	maize	IMI	IMI	4.9	na	Aligreen (Aventis)	not specified	na	na	35 km west of Lleida	Catalonia	1	1999	Albajes2003-1-1999	Table 3	planted with a "conventional drill", sprayed with herbicide two days after planting (alachlor + atrazine)	7000	plot size varied from one year to another from 0.4 to 1 ha, but they were uniform within the same year	yes	yes	randomized complete block	1999-05-12	na	na	na	sampled throughout the season; weekly for pitfalls and with less frequency for visual assessments	yes	0.2	na	no insecticide	na
48	1	Albajes2003	Albajes, R., C. Lopez, and X. Pons	2003	Journal of Economic Entomology	96(6): 1805-1813	Predatory fauna in cornfields and response to imidacloprid seed treatment	public	government	yes	Spain	Europe	field	study	no	na	no	maize	maize	IMI	IMI	4.9	na	Aligreen (Aventis)	not specified	na	na	35 km west of Lleida	Catalonia	1	1999	Albajes2003-1-1999	Table 3	planted with a "conventional drill", sprayed with herbicide two days after planting (alachlor + atrazine)	7000	plot size varied from one year to another from 0.4 to 1 ha, but they were uniform within the same year	yes	yes	randomized complete block	1999-05-12	na	na	na	sampled throughout the season; weekly for pitfalls and with less frequency for visual assessments	yes	0.2	na	no insecticide	na
49	1	Albajes2003	Albajes, R., C. Lopez, and X. Pons	2003	Journal of Economic Entomology	96(6): 1805-1813	Predatory fauna in cornfields and response to imidacloprid seed treatment	public	government	yes	Spain	Europe	field	study	no	na	no	maize	maize	IMI	IMI	4.9	na	Aligreen (Aventis)	not specified	na	na	35 km west of Lleida	Catalonia	1	1999	Albajes2003-1-1999	Table 3	planted with a "conventional drill", sprayed with herbicide two days after planting (alachlor + atrazine)	7000	plot size varied from one year to another from 0.4 to 1 ha, but they were uniform within the same year	yes	yes	randomized complete block	1999-05-12	na	na	na	sampled throughout the season; weekly for pitfalls and with less frequency for visual assessments	yes	0.2	na	no insecticide	na
50	1	Albajes2003	Albajes, R., C. Lopez, and X. Pons	2003	Journal of Economic Entomology	96(6): 1805-1813	Predatory fauna in cornfields and response to imidacloprid seed treatment	public	government	yes	Spain	Europe	field	study	no	na	no	maize	maize	IMI	IMI	4.9	na	Aligreen (Aventis)	not specified	na	na	35 km west of Lleida	Catalonia	1	1999	Albajes2003-1-1999	Table 3	planted with a "conventional drill", sprayed with herbicide two days after planting (alachlor + atrazine)	7000	plot size varied from one year to another from 0.4 to 1 ha, but they were uniform within the same year	yes	yes	randomized complete block	1999-05-12	na	na	na	sampled throughout the season; weekly for pitfalls and with less frequency for visual assessments	yes	0.2	na	no insecticide	na
51	1	Albajes2003	Albajes, R., C. Lopez, and X. Pons	2003	Journal of Economic Entomology	96(6): 1805-1813	Predatory fauna in cornfields and response to imidacloprid seed treatment	public	government	yes	Spain	Europe	field	study	no	na	no	maize	maize	IMI	IMI	4.9	na	Aligreen (Aventis)	not specified	na	na	35 km west of Lleida	Catalonia	1	1999	Albajes2003-1-1999	Table 3	planted with a "conventional drill", sprayed with herbicide two days after planting (alachlor + atrazine)	7000	plot size varied from one year to another from 0.4 to 1 ha, but they were uniform within the same year	yes	yes	randomized complete block	1999-05-12	na	na	na	sampled throughout the season; weekly for pitfalls and with less frequency for visual assessments	yes	0.2	na	no insecticide	na
52	1	Albajes2003	Albajes, R., C. Lopez, and X. Pons	2003	Journal of Economic Entomology	96(6): 1805-1813	Predatory fauna in cornfields and response to imidacloprid seed treatment	public	government	yes	Spain	Europe	field	study	no	na	no	maize	maize	IMI	IMI	4.9	na	Dracma (Syngenta)	not specified	na	na	35 km west of Lleida	Catalonia	2	2000	Albajes2003-2-2000	Table 3	planted with a "conventional drill", sprayed with herbicide two days after planting (alachlor + atrazine)	7000	plot size varied from one year to another from 0.4 to 1 ha, but they were uniform within the same year	yes	yes	randomized complete block	2000-05-03	na	na	na	sampled throughout the season; weekly for pitfalls and with less frequency for visual assessments	yes	0.2	na	no insecticide	na
53	1	Albajes2003	Albajes, R., C. Lopez, and X. Pons	2003	Journal of Economic Entomology	96(6): 1805-1813	Predatory fauna in cornfields and response to imidacloprid seed treatment	public	government	yes	Spain	Europe	field	study	no	na	no	maize	maize	IMI	IMI	4.9	na	Dracma (Syngenta)	not specified	na	na	35 km west of Lleida	Catalonia	2	2000	Albajes2003-2-2000	Table 3	planted with a "conventional drill", sprayed with herbicide two days after planting (alachlor + atrazine)	7000	plot size varied from one year to another from 0.4 to 1 ha, but they were uniform within the same year	yes	yes	randomized complete block	2000-05-03	na	na	na	sampled throughout the season; weekly for pitfalls and with less frequency for visual assessments	yes	0.2	na	no insecticide	na
54	1	Albajes2003	Albajes, R., C. Lopez, and X. Pons	2003	Journal of Economic Entomology	96(6): 1805-1813	Predatory fauna in cornfields and response to imidacloprid seed treatment	public	government	yes	Spain	Europe	field	study	no	na	no	maize	maize	IMI	IMI	4.9	na	Dracma (Syngenta)	not specified	na	na	35 km west of Lleida	Catalonia	2	2000	Albajes2003-2-2000	Table 3	planted with a "conventional drill", sprayed with herbicide two days after planting (alachlor + atrazine)	7000	plot size varied from one year to another from 0.4 to 1 ha, but they were uniform within the same year	yes	yes	randomized complete block	2000-05-03	na	na	na	sampled throughout the season; weekly for pitfalls and with less frequency for visual assessments	yes	0.2	na	no insecticide	na
55	1	Albajes2003	Albajes, R., C. Lopez, and X. Pons	2003	Journal of Economic Entomology	96(6): 1805-1813	Predatory fauna in cornfields and response to imidacloprid seed treatment	public	government	yes	Spain	Europe	field	study	no	na	no	maize	maize	IMI	IMI	4.9	na	Dracma (Syngenta)	not specified	na	na	35 km west of Lleida	Catalonia	2	2000	Albajes2003-2-2000	Table 3	planted with a "conventional drill", sprayed with herbicide two days after planting (alachlor + atrazine)	7000	plot size varied from one year to another from 0.4 to 1 ha, but they were uniform within the same year	yes	yes	randomized complete block	2000-05-03	na	na	na	sampled throughout the season; weekly for pitfalls and with less frequency for visual assessments	yes	0.2	na	no insecticide	na
56	1	Albajes2003	Albajes, R., C. Lopez, and X. Pons	2003	Journal of Economic Entomology	96(6): 1805-1813	Predatory fauna in cornfields and response to imidacloprid seed treatment	public	government	yes	Spain	Europe	field	study	no	na	no	maize	maize	IMI	IMI	4.9	na	Dracma (Syngenta)	not specified	na	na	35 km west of Lleida	Catalonia	2	2000	Albajes2003-2-2000	Table 3	planted with a "conventional drill", sprayed with herbicide two days after planting (alachlor + atrazine)	7000	plot size varied from one year to another from 0.4 to 1 ha, but they were uniform within the same year	yes	yes	randomized complete block	2000-05-03	na	na	na	sampled throughout the season; weekly for pitfalls and with less frequency for visual assessments	yes	0.2	na	no insecticide	na
57	1	Albajes2003	Albajes, R., C. Lopez, and X. Pons	2003	Journal of Economic Entomology	96(6): 1805-1813	Predatory fauna in cornfields and response to imidacloprid seed treatment	public	government	yes	Spain	Europe	field	study	no	na	no	maize	maize	IMI	IMI	4.9	na	Dracma (Syngenta)	not specified	na	na	35 km west of Lleida	Catalonia	2	2000	Albajes2003-2-2000	Table 3	planted with a "conventional drill", sprayed with herbicide two days after planting (alachlor + atrazine)	7000	plot size varied from one year to another from 0.4 to 1 ha, but they were uniform within the same year	yes	yes	randomized complete block	2000-05-03	na	na	na	sampled throughout the season; weekly for pitfalls and with less frequency for visual assessments	yes	0.2	na	no insecticide	na
58	1	Albajes2003	Albajes, R., C. Lopez, and X. Pons	2003	Journal of Economic Entomology	96(6): 1805-1813	Predatory fauna in cornfields and response to imidacloprid seed treatment	public	government	yes	Spain	Europe	field	study	no	na	no	maize	maize	IMI	IMI	4.9	na	Dracma (Syngenta)	not specified	na	na	35 km west of Lleida	Catalonia	2	2000	Albajes2003-2-2000	Table 3	planted with a "conventional drill", sprayed with herbicide two days after planting (alachlor + atrazine)	7000	plot size varied from one year to another from 0.4 to 1 ha, but they were uniform within the same year	yes	yes	randomized complete block	2000-05-03	na	na	na	sampled throughout the season; weekly for pitfalls and with less frequency for visual assessments	yes	0.2	na	no insecticide	na
59	1	Albajes2003	Albajes, R., C. Lopez, and X. Pons	2003	Journal of Economic Entomology	96(6): 1805-1813	Predatory fauna in cornfields and response to imidacloprid seed treatment	public	government	yes	Spain	Europe	field	study	no	na	no	maize	maize	IMI	IMI	4.9	na	Dracma (Syngenta)	not specified	na	na	35 km west of Lleida	Catalonia	1	2001	Albajes2003-1-2001	Table 3	planted with a "conventional drill", sprayed with herbicide two days after planting (alachlor + atrazine)	7000	plot size varied from one year to another from 0.4 to 1 ha, but they were uniform within the same year	yes	yes	randomized complete block	2001-04-27	na	na	na	sampled throughout the season; weekly for pitfalls and with less frequency for visual assessments	yes	0.2	na	no insecticide	na
60	1	Albajes2003	Albajes, R., C. Lopez, and X. Pons	2003	Journal of Economic Entomology	96(6): 1805-1813	Predatory fauna in cornfields and response to imidacloprid seed treatment	public	government	yes	Spain	Europe	field	study	no	na	no	maize	maize	IMI	IMI	4.9	na	Dracma (Syngenta)	not specified	na	na	35 km west of Lleida	Catalonia	1	2001	Albajes2003-1-2001	Table 3	planted with a "conventional drill", sprayed with herbicide two days after planting (alachlor + atrazine)	7000	plot size varied from one year to another from 0.4 to 1 ha, but they were uniform within the same year	yes	yes	randomized complete block	2001-04-27	na	na	na	sampled throughout the season; weekly for pitfalls and with less frequency for visual assessments	yes	0.2	na	no insecticide	na
61	1	Albajes2003	Albajes, R., C. Lopez, and X. Pons	2003	Journal of Economic Entomology	96(6): 1805-1813	Predatory fauna in cornfields and response to imidacloprid seed treatment	public	government	yes	Spain	Europe	field	study	no	na	no	maize	maize	IMI	IMI	4.9	na	Dracma (Syngenta)	not specified	na	na	35 km west of Lleida	Catalonia	1	2001	Albajes2003-1-2001	Table 3	planted with a "conventional drill", sprayed with herbicide two days after planting (alachlor + atrazine)	7000	plot size varied from one year to another from 0.4 to 1 ha, but they were uniform within the same year	yes	yes	randomized complete block	2001-04-27	na	na	na	sampled throughout the season; weekly for pitfalls and with less frequency for visual assessments	yes	0.2	na	no insecticide	na
62	1	Albajes2003	Albajes, R., C. Lopez, and X. Pons	2003	Journal of Economic Entomology	96(6): 1805-1813	Predatory fauna in cornfields and response to imidacloprid seed treatment	public	government	yes	Spain	Europe	field	study	no	na	no	maize	maize	IMI	IMI	4.9	na	Dracma (Syngenta)	not specified	na	na	35 km west of Lleida	Catalonia	1	2001	Albajes2003-1-2001	Table 3	planted with a "conventional drill", sprayed with herbicide two days after planting (alachlor + atrazine)	7000	plot size varied from one year to another from 0.4 to 1 ha, but they were uniform within the same year	yes	yes	randomized complete block	2001-04-27	na	na	na	sampled throughout the season; weekly for pitfalls and with less frequency for visual assessments	yes	0.2	na	no insecticide	na
63	1	Albajes2003	Albajes, R., C. Lopez, and X. Pons	2003	Journal of Economic Entomology	96(6): 1805-1813	Predatory fauna in cornfields and response to imidacloprid seed treatment	public	government	yes	Spain	Europe	field	study	no	na	no	maize	maize	IMI	IMI	4.9	na	Dracma (Syngenta)	not specified	na	na	35 km west of Lleida	Catalonia	1	2001	Albajes2003-1-2001	Table 3	planted with a "conventional drill", sprayed with herbicide two days after planting (alachlor + atrazine)	7000	plot size varied from one year to another from 0.4 to 1 ha, but they were uniform within the same year	yes	yes	randomized complete block	2001-04-27	na	na	na	sampled throughout the season; weekly for pitfalls and with less frequency for visual assessments	yes	0.2	na	no insecticide	na
64	2	Baker2002	Baker, P., L. A. Haylock, B. H. Garner, R. J. N. Sands, and A. M. Dewar	2002	The BCPC Conference - Pests & Diseases 2002	na	The effects of insecticide seed treatments on beneficial invertebrates in sugar beet	public	government/crop industry	no	United Kingdom	Europe	field	study	yes	converted SED to SEM (Saville et al. 2003)	no	sugar beet	other	IMI	IMI	na	0.6	not given	not specified	na	na	Broom's Barn	Suffolk	1	2001	Baker2002-1-2001	Table 1	seed planted "at the commercial rate"; seed drilled 18.2 cm apart in rows 50 cm apart	108	na	no	yes	randomized block	2001-05-07	2001-10-04	2001-10-04	1	estimated planting date from incomplete info	no	0	1	no insecticide	na
65	2	Baker2002	Baker, P., L. A. Haylock, B. H. Garner, R. J. N. Sands, and A. M. Dewar	2002	The BCPC Conference - Pests & Diseases 2002	na	The effects of insecticide seed treatments on beneficial invertebrates in sugar beet	public	government/crop industry	no	United Kingdom	Europe	field	study	yes	converted SED to SEM (Saville et al. 2003)	no	sugar beet	other	IMI	IMI	na	0.9	not given	not specified	na	na	Broom's Barn	Suffolk	1	2001	Baker2002-1-2001	Table 1	seed planted "at the commercial rate"; seed drilled 18.2 cm apart in rows 50 cm apart	108	na	no	yes	randomized block	2001-05-07	2001-10-04	2001-10-04	1	estimated planting date from incomplete info	no	0	1	no insecticide	na
66	2	Baker2002	Baker, P., L. A. Haylock, B. H. Garner, R. J. N. Sands, and A. M. Dewar	2002	The BCPC Conference - Pests & Diseases 2002	na	The effects of insecticide seed treatments on beneficial invertebrates in sugar beet	public	government/crop industry	no	United Kingdom	Europe	field	study	yes	converted SED to SEM (Saville et al. 2003)	no	sugar beet	other	THX	THX/CLO	na	0.6	not given	not specified	na	na	Broom's Barn	Suffolk	1	2001	Baker2002-1-2001	Table 1	seed planted "at the commercial rate"; seed drilled 18.2 cm apart in rows 50 cm apart	108	na	no	yes	randomized block	2001-05-07	2001-10-04	2001-10-04	1	estimated planting date from incomplete info	no	0	1	no insecticide	na
67	2	Baker2002	Baker, P., L. A. Haylock, B. H. Garner, R. J. N. Sands, and A. M. Dewar	2002	The BCPC Conference - Pests & Diseases 2002	na	The effects of insecticide seed treatments on beneficial invertebrates in sugar beet	public	government/crop industry	no	United Kingdom	Europe	field	study	yes	converted SED to SEM (Saville et al. 2003)	no	sugar beet	other	CLO	THX/CLO	na	0.6	not given	not specified	na	na	Broom's Barn	Suffolk	1	2001	Baker2002-1-2001	Table 1	seed planted "at the commercial rate"; seed drilled 18.2 cm apart in rows 50 cm apart	108	na	no	yes	randomized block	2001-05-07	2001-10-04	2001-10-04	1	estimated planting date from incomplete info	no	0	1	no insecticide	na
68	2	Baker2002	Baker, P., L. A. Haylock, B. H. Garner, R. J. N. Sands, and A. M. Dewar	2002	The BCPC Conference - Pests & Diseases 2002	na	The effects of insecticide seed treatments on beneficial invertebrates in sugar beet	public	government/crop industry	no	United Kingdom	Europe	field	study	yes	converted SED to SEM (Saville et al. 2003)	no	sugar beet	other	IMI	IMI	na	0.6	not given	not specified	na	na	Broom's Barn	Suffolk	1	2001	Baker2002-1-2001	Table 4	seed planted "at the commercial rate"; seed drilled 18.2 cm apart in rows 50 cm apart	108	na	no	yes	randomized block	2001-05-07	2001-06-15	2001-08-15	61	estimated planting, first, and last sample dates from incomplete info	yes	0.33	3	no insecticide	na
69	2	Baker2002	Baker, P., L. A. Haylock, B. H. Garner, R. J. N. Sands, and A. M. Dewar	2002	The BCPC Conference - Pests & Diseases 2002	na	The effects of insecticide seed treatments on beneficial invertebrates in sugar beet	public	government/crop industry	no	United Kingdom	Europe	field	study	yes	converted SED to SEM (Saville et al. 2003)	no	sugar beet	other	IMI	IMI	na	0.9	not given	not specified	na	na	Broom's Barn	Suffolk	1	2001	Baker2002-1-2001	Table 4	seed planted "at the commercial rate"; seed drilled 18.2 cm apart in rows 50 cm apart	108	na	no	yes	randomized block	2001-05-07	2001-06-15	2001-08-15	61	estimated planting, first, and last sample dates from incomplete info	yes	0.33	3	no insecticide	na
70	2	Baker2002	Baker, P., L. A. Haylock, B. H. Garner, R. J. N. Sands, and A. M. Dewar	2002	The BCPC Conference - Pests & Diseases 2002	na	The effects of insecticide seed treatments on beneficial invertebrates in sugar beet	public	government/crop industry	no	United Kingdom	Europe	field	study	yes	converted SED to SEM (Saville et al. 2003)	no	sugar beet	other	THX	THX/CLO	na	0.6	not given	not specified	na	na	Broom's Barn	Suffolk	1	2001	Baker2002-1-2001	Table 4	seed planted "at the commercial rate"; seed drilled 18.2 cm apart in rows 50 cm apart	108	na	no	yes	randomized block	2001-05-07	2001-06-15	2001-08-15	61	estimated planting, first, and last sample dates from incomplete info	yes	0.33	3	no insecticide	na
71	2	Baker2002	Baker, P., L. A. Haylock, B. H. Garner, R. J. N. Sands, and A. M. Dewar	2002	The BCPC Conference - Pests & Diseases 2002	na	The effects of insecticide seed treatments on beneficial invertebrates in sugar beet	public	government/crop industry	no	United Kingdom	Europe	field	study	yes	converted SED to SEM (Saville et al. 2003)	no	sugar beet	other	CLO	THX/CLO	na	0.6	not given	not specified	na	na	Broom's Barn	Suffolk	1	2001	Baker2002-1-2001	Table 4	seed planted "at the commercial rate"; seed drilled 18.2 cm apart in rows 50 cm apart	108	na	no	yes	randomized block	2001-05-07	2001-06-15	2001-08-15	61	estimated planting, first, and last sample dates from incomplete info	yes	0.33	3	no insecticide	na
72	2	Baker2002	Baker, P., L. A. Haylock, B. H. Garner, R. J. N. Sands, and A. M. Dewar	2002	The BCPC Conference - Pests & Diseases 2002	na	The effects of insecticide seed treatments on beneficial invertebrates in sugar beet	public	government/crop industry	no	United Kingdom	Europe	field	study	yes	converted SED to SEM (Saville et al. 2003)	no	sugar beet	other	IMI	IMI	na	0.6	not given	not specified	na	na	Broom's Barn	Suffolk	1	2001	Baker2002-1-2001	Table 4	seed planted "at the commercial rate"; seed drilled 18.2 cm apart in rows 50 cm apart	108	na	no	yes	randomized block	2001-05-07	2001-06-15	2001-08-15	61	estimated planting, first, and last sample dates from incomplete info	yes	0.33	3	no insecticide	na
73	2	Baker2002	Baker, P., L. A. Haylock, B. H. Garner, R. J. N. Sands, and A. M. Dewar	2002	The BCPC Conference - Pests & Diseases 2002	na	The effects of insecticide seed treatments on beneficial invertebrates in sugar beet	public	government/crop industry	no	United Kingdom	Europe	field	study	yes	converted SED to SEM (Saville et al. 2003)	no	sugar beet	other	IMI	IMI	na	0.9	not given	not specified	na	na	Broom's Barn	Suffolk	1	2001	Baker2002-1-2001	Table 4	seed planted "at the commercial rate"; seed drilled 18.2 cm apart in rows 50 cm apart	108	na	no	yes	randomized block	2001-05-07	2001-06-15	2001-08-15	61	estimated planting, first, and last sample dates from incomplete info	yes	0.33	3	no insecticide	na
74	2	Baker2002	Baker, P., L. A. Haylock, B. H. Garner, R. J. N. Sands, and A. M. Dewar	2002	The BCPC Conference - Pests & Diseases 2002	na	The effects of insecticide seed treatments on beneficial invertebrates in sugar beet	public	government/crop industry	no	United Kingdom	Europe	field	study	yes	converted SED to SEM (Saville et al. 2003)	no	sugar beet	other	THX	THX/CLO	na	0.6	not given	not specified	na	na	Broom's Barn	Suffolk	1	2001	Baker2002-1-2001	Table 4	seed planted "at the commercial rate"; seed drilled 18.2 cm apart in rows 50 cm apart	108	na	no	yes	randomized block	2001-05-07	2001-06-15	2001-08-15	61	estimated planting, first, and last sample dates from incomplete info	yes	0.33	3	no insecticide	na
75	2	Baker2002	Baker, P., L. A. Haylock, B. H. Garner, R. J. N. Sands, and A. M. Dewar	2002	The BCPC Conference - Pests & Diseases 2002	na	The effects of insecticide seed treatments on beneficial invertebrates in sugar beet	public	government/crop industry	no	United Kingdom	Europe	field	study	yes	converted SED to SEM (Saville et al. 2003)	no	sugar beet	other	CLO	THX/CLO	na	0.6	not given	not specified	na	na	Broom's Barn	Suffolk	1	2001	Baker2002-1-2001	Table 4	seed planted "at the commercial rate"; seed drilled 18.2 cm apart in rows 50 cm apart	108	na	no	yes	randomized block	2001-05-07	2001-06-15	2001-08-15	61	estimated planting, first, and last sample dates from incomplete info	yes	0.33	3	no insecticide	na
76	2	Baker2002	Baker, P., L. A. Haylock, B. H. Garner, R. J. N. Sands, and A. M. Dewar	2002	The BCPC Conference - Pests & Diseases 2002	na	The effects of insecticide seed treatments on beneficial invertebrates in sugar beet	public	government/crop industry	no	United Kingdom	Europe	field	study	yes	converted SED to SEM (Saville et al. 2003)	no	sugar beet	other	IMI	IMI	na	0.6	not given	not specified	na	na	Broom's Barn	Suffolk	1	2001	Baker2002-1-2001	Table 4	seed planted "at the commercial rate"; seed drilled 18.2 cm apart in rows 50 cm apart	108	na	no	yes	randomized block	2001-05-07	2001-06-15	2001-08-15	61	estimated planting, first, and last sample dates from incomplete info	yes	0.33	3	no insecticide	na
77	2	Baker2002	Baker, P., L. A. Haylock, B. H. Garner, R. J. N. Sands, and A. M. Dewar	2002	The BCPC Conference - Pests & Diseases 2002	na	The effects of insecticide seed treatments on beneficial invertebrates in sugar beet	public	government/crop industry	no	United Kingdom	Europe	field	study	yes	converted SED to SEM (Saville et al. 2003)	no	sugar beet	other	IMI	IMI	na	0.9	not given	not specified	na	na	Broom's Barn	Suffolk	1	2001	Baker2002-1-2001	Table 4	seed planted "at the commercial rate"; seed drilled 18.2 cm apart in rows 50 cm apart	108	na	no	yes	randomized block	2001-05-07	2001-06-15	2001-08-15	61	estimated planting, first, and last sample dates from incomplete info	yes	0.33	3	no insecticide	na
78	2	Baker2002	Baker, P., L. A. Haylock, B. H. Garner, R. J. N. Sands, and A. M. Dewar	2002	The BCPC Conference - Pests & Diseases 2002	na	The effects of insecticide seed treatments on beneficial invertebrates in sugar beet	public	government/crop industry	no	United Kingdom	Europe	field	study	yes	converted SED to SEM (Saville et al. 2003)	no	sugar beet	other	THX	THX/CLO	na	0.6	not given	not specified	na	na	Broom's Barn	Suffolk	1	2001	Baker2002-1-2001	Table 4	seed planted "at the commercial rate"; seed drilled 18.2 cm apart in rows 50 cm apart	108	na	no	yes	randomized block	2001-05-07	2001-06-15	2001-08-15	61	estimated planting, first, and last sample dates from incomplete info	yes	0.33	3	no insecticide	na
79	2	Baker2002	Baker, P., L. A. Haylock, B. H. Garner, R. J. N. Sands, and A. M. Dewar	2002	The BCPC Conference - Pests & Diseases 2002	na	The effects of insecticide seed treatments on beneficial invertebrates in sugar beet	public	government/crop industry	no	United Kingdom	Europe	field	study	yes	converted SED to SEM (Saville et al. 2003)	no	sugar beet	other	CLO	THX/CLO	na	0.6	not given	not specified	na	na	Broom's Barn	Suffolk	1	2001	Baker2002-1-2001	Table 4	seed planted "at the commercial rate"; seed drilled 18.2 cm apart in rows 50 cm apart	108	na	no	yes	randomized block	2001-05-07	2001-06-15	2001-08-15	61	estimated planting, first, and last sample dates from incomplete info	yes	0.33	3	no insecticide	na
80	2	Baker2002	Baker, P., L. A. Haylock, B. H. Garner, R. J. N. Sands, and A. M. Dewar	2002	The BCPC Conference - Pests & Diseases 2002	na	The effects of insecticide seed treatments on beneficial invertebrates in sugar beet	public	government/crop industry	no	United Kingdom	Europe	field	study	yes	converted SED to SEM (Saville et al. 2003)	no	sugar beet	other	IMI	IMI	na	0.6	not given	not specified	na	na	Broom's Barn	Suffolk	1	2001	Baker2002-1-2001	Table 4	seed planted "at the commercial rate"; seed drilled 18.2 cm apart in rows 50 cm apart	108	na	no	yes	randomized block	2001-05-07	2001-06-15	2001-08-15	61	estimated planting, first, and last sample dates from incomplete info	yes	0.33	3	no insecticide	na
81	2	Baker2002	Baker, P., L. A. Haylock, B. H. Garner, R. J. N. Sands, and A. M. Dewar	2002	The BCPC Conference - Pests & Diseases 2002	na	The effects of insecticide seed treatments on beneficial invertebrates in sugar beet	public	government/crop industry	no	United Kingdom	Europe	field	study	yes	converted SED to SEM (Saville et al. 2003)	no	sugar beet	other	IMI	IMI	na	0.9	not given	not specified	na	na	Broom's Barn	Suffolk	1	2001	Baker2002-1-2001	Table 4	seed planted "at the commercial rate"; seed drilled 18.2 cm apart in rows 50 cm apart	108	na	no	yes	randomized block	2001-05-07	2001-06-15	2001-08-15	61	estimated planting, first, and last sample dates from incomplete info	yes	0.33	3	no insecticide	na
82	2	Baker2002	Baker, P., L. A. Haylock, B. H. Garner, R. J. N. Sands, and A. M. Dewar	2002	The BCPC Conference - Pests & Diseases 2002	na	The effects of insecticide seed treatments on beneficial invertebrates in sugar beet	public	government/crop industry	no	United Kingdom	Europe	field	study	yes	converted SED to SEM (Saville et al. 2003)	no	sugar beet	other	THX	THX/CLO	na	0.6	not given	not specified	na	na	Broom's Barn	Suffolk	1	2001	Baker2002-1-2001	Table 4	seed planted "at the commercial rate"; seed drilled 18.2 cm apart in rows 50 cm apart	108	na	no	yes	randomized block	2001-05-07	2001-06-15	2001-08-15	61	estimated planting, first, and last sample dates from incomplete info	yes	0.33	3	no insecticide	na
83	2	Baker2002	Baker, P., L. A. Haylock, B. H. Garner, R. J. N. Sands, and A. M. Dewar	2002	The BCPC Conference - Pests & Diseases 2002	na	The effects of insecticide seed treatments on beneficial invertebrates in sugar beet	public	government/crop industry	no	United Kingdom	Europe	field	study	yes	converted SED to SEM (Saville et al. 2003)	no	sugar beet	other	CLO	THX/CLO	na	0.6	not given	not specified	na	na	Broom's Barn	Suffolk	1	2001	Baker2002-1-2001	Table 4	seed planted "at the commercial rate"; seed drilled 18.2 cm apart in rows 50 cm apart	108	na	no	yes	randomized block	2001-05-07	2001-06-15	2001-08-15	61	estimated planting, first, and last sample dates from incomplete info	yes	0.33	3	no insecticide	na
161	5	Seagraves2012	Seagraves, M. S. and J. G. Lundgren	2012	Journal of Pest Science	85: 125-132	Effects of neonicotinoid seed treatments on soybean aphid and its natural enemies	public	government/crop industry	yes	USA	North America	field	author	no	na	no	soybean	soybean	IMI	IMI	0.63	na	A 1702	not specified	na	na	Eastern SD Soil and Water Research Farm near Brookings	SD	1	2009	Seagraves2012-1-2009	author spreadsheet	plant pop 465,000 per ha; 76.2 cm rows	41	na	no	yes	randomized block	2009-05-15	2009-06-30	2009-08-18	49	dates inferred from Table 2	yes	0.13	8	no insecticide	na
162	5	Seagraves2012	Seagraves, M. S. and J. G. Lundgren	2012	Journal of Pest Science	85: 125-132	Effects of neonicotinoid seed treatments on soybean aphid and its natural enemies	public	government/crop industry	yes	USA	North America	field	author	no	na	no	soybean	soybean	IMI	IMI	0.63	na	A 1702	not specified	na	na	Eastern SD Soil and Water Research Farm near Brookings	SD	1	2009	Seagraves2012-1-2009	author spreadsheet	plant pop 465,000 per ha; 76.2 cm rows	41	na	no	yes	randomized block	2009-05-15	2009-06-30	2009-08-18	49	dates inferred from Table 2	yes	0.13	8	no insecticide	na
163	5	Seagraves2012	Seagraves, M. S. and J. G. Lundgren	2012	Journal of Pest Science	85: 125-132	Effects of neonicotinoid seed treatments on soybean aphid and its natural enemies	public	government/crop industry	yes	USA	North America	field	author	no	na	no	soybean	soybean	IMI	IMI	0.63	na	A 1702	not specified	na	na	Eastern SD Soil and Water Research Farm near Brookings	SD	1	2009	Seagraves2012-1-2009	author spreadsheet	plant pop 465,000 per ha; 76.2 cm rows	41	na	no	yes	randomized block	2009-05-15	2009-06-30	2009-08-18	49	dates inferred from Table 2	yes	0.13	8	no insecticide	na
164	5	Seagraves2012	Seagraves, M. S. and J. G. Lundgren	2012	Journal of Pest Science	85: 125-132	Effects of neonicotinoid seed treatments on soybean aphid and its natural enemies	public	government/crop industry	yes	USA	North America	field	author	no	na	no	soybean	soybean	IMI	IMI	0.63	na	A 1702	not specified	na	na	Eastern SD Soil and Water Research Farm near Brookings	SD	1	2009	Seagraves2012-1-2009	author spreadsheet	plant pop 465,000 per ha; 76.2 cm rows	41	na	no	yes	randomized block	2009-05-15	2009-06-30	2009-08-18	49	dates inferred from Table 2	yes	0.13	8	no insecticide	na
165	5	Seagraves2012	Seagraves, M. S. and J. G. Lundgren	2012	Journal of Pest Science	85: 125-132	Effects of neonicotinoid seed treatments on soybean aphid and its natural enemies	public	government/crop industry	yes	USA	North America	field	author	no	na	no	soybean	soybean	IMI	IMI	0.63	na	A 1702	not specified	na	na	Eastern SD Soil and Water Research Farm near Brookings	SD	1	2009	Seagraves2012-1-2009	author spreadsheet	plant pop 465,000 per ha; 76.2 cm rows	41	na	no	yes	randomized block	2009-05-15	2009-06-30	2009-08-18	49	dates inferred from Table 2	yes	0.13	8	no insecticide	na
166	5	Seagraves2012	Seagraves, M. S. and J. G. Lundgren	2012	Journal of Pest Science	85: 125-132	Effects of neonicotinoid seed treatments on soybean aphid and its natural enemies	public	government/crop industry	yes	USA	North America	field	author	no	na	no	soybean	soybean	IMI	IMI	0.63	na	A 1702	not specified	na	na	Eastern SD Soil and Water Research Farm near Brookings	SD	1	2009	Seagraves2012-1-2009	author spreadsheet	plant pop 465,000 per ha; 76.2 cm rows	41	na	no	yes	randomized block	2009-05-15	2009-06-30	2009-08-18	49	dates inferred from Table 2	yes	0.13	8	no insecticide	na
167	5	Seagraves2012	Seagraves, M. S. and J. G. Lundgren	2012	Journal of Pest Science	85: 125-132	Effects of neonicotinoid seed treatments on soybean aphid and its natural enemies	public	government/crop industry	yes	USA	North America	field	author	no	na	no	soybean	soybean	IMI	IMI	0.63	na	A 1702	not specified	na	na	Eastern SD Soil and Water Research Farm near Brookings	SD	1	2009	Seagraves2012-1-2009	author spreadsheet	plant pop 465,000 per ha; 76.2 cm rows	41	na	no	yes	randomized block	2009-05-15	2009-06-30	2009-08-18	49	dates inferred from Table 2	yes	0.13	8	no insecticide	na
168	5	Seagraves2012	Seagraves, M. S. and J. G. Lundgren	2012	Journal of Pest Science	85: 125-132	Effects of neonicotinoid seed treatments on soybean aphid and its natural enemies	public	government/crop industry	yes	USA	North America	field	author	no	na	no	soybean	soybean	IMI	IMI	0.63	na	A 1702	not specified	na	na	Eastern SD Soil and Water Research Farm near Brookings	SD	1	2009	Seagraves2012-1-2009	author spreadsheet	plant pop 465,000 per ha; 76.2 cm rows	41	na	no	yes	randomized block	2009-05-15	2009-06-30	2009-08-18	49	dates inferred from Table 2	yes	0.13	8	no insecticide	na
169	5	Seagraves2012	Seagraves, M. S. and J. G. Lundgren	2012	Journal of Pest Science	85: 125-132	Effects of neonicotinoid seed treatments on soybean aphid and its natural enemies	public	government/crop industry	yes	USA	North America	field	author	no	na	no	soybean	soybean	THX	THX/CLO	0.5	na	A 1702	not specified	na	na	Eastern SD Soil and Water Research Farm near Brookings	SD	1	2009	Seagraves2012-1-2009	author spreadsheet	plant pop 465,000 per ha; 76.2 cm rows	41	na	no	yes	randomized block	2009-05-15	2009-06-30	2009-08-18	49	dates inferred from Table 2	yes	0.13	8	no insecticide	na
170	5	Seagraves2012	Seagraves, M. S. and J. G. Lundgren	2012	Journal of Pest Science	85: 125-132	Effects of neonicotinoid seed treatments on soybean aphid and its natural enemies	public	government/crop industry	yes	USA	North America	field	author	no	na	no	soybean	soybean	THX	THX/CLO	0.5	na	A 1702	not specified	na	na	Eastern SD Soil and Water Research Farm near Brookings	SD	1	2009	Seagraves2012-1-2009	author spreadsheet	plant pop 465,000 per ha; 76.2 cm rows	41	na	no	yes	randomized block	2009-05-15	2009-06-30	2009-08-18	49	dates inferred from Table 2	yes	0.13	8	no insecticide	na
171	5	Seagraves2012	Seagraves, M. S. and J. G. Lundgren	2012	Journal of Pest Science	85: 125-132	Effects of neonicotinoid seed treatments on soybean aphid and its natural enemies	public	government/crop industry	yes	USA	North America	field	author	no	na	no	soybean	soybean	THX	THX/CLO	0.5	na	A 1702	not specified	na	na	Eastern SD Soil and Water Research Farm near Brookings	SD	1	2009	Seagraves2012-1-2009	author spreadsheet	plant pop 465,000 per ha; 76.2 cm rows	41	na	no	yes	randomized block	2009-05-15	2009-06-30	2009-08-18	49	dates inferred from Table 2	yes	0.13	8	no insecticide	na
172	5	Seagraves2012	Seagraves, M. S. and J. G. Lundgren	2012	Journal of Pest Science	85: 125-132	Effects of neonicotinoid seed treatments on soybean aphid and its natural enemies	public	government/crop industry	yes	USA	North America	field	author	no	na	no	soybean	soybean	THX	THX/CLO	0.5	na	A 1702	not specified	na	na	Eastern SD Soil and Water Research Farm near Brookings	SD	1	2009	Seagraves2012-1-2009	author spreadsheet	plant pop 465,000 per ha; 76.2 cm rows	41	na	no	yes	randomized block	2009-05-15	2009-06-30	2009-08-18	49	dates inferred from Table 2	yes	0.13	8	no insecticide	na
173	5	Seagraves2012	Seagraves, M. S. and J. G. Lundgren	2012	Journal of Pest Science	85: 125-132	Effects of neonicotinoid seed treatments on soybean aphid and its natural enemies	public	government/crop industry	yes	USA	North America	field	author	no	na	no	soybean	soybean	THX	THX/CLO	0.5	na	A 1702	not specified	na	na	Eastern SD Soil and Water Research Farm near Brookings	SD	1	2009	Seagraves2012-1-2009	author spreadsheet	plant pop 465,000 per ha; 76.2 cm rows	41	na	no	yes	randomized block	2009-05-15	2009-06-30	2009-08-18	49	dates inferred from Table 2	yes	0.13	8	no insecticide	na
174	5	Seagraves2012	Seagraves, M. S. and J. G. Lundgren	2012	Journal of Pest Science	85: 125-132	Effects of neonicotinoid seed treatments on soybean aphid and its natural enemies	public	government/crop industry	yes	USA	North America	field	author	no	na	no	soybean	soybean	THX	THX/CLO	0.5	na	A 1702	not specified	na	na	Eastern SD Soil and Water Research Farm near Brookings	SD	1	2009	Seagraves2012-1-2009	author spreadsheet	plant pop 465,000 per ha; 76.2 cm rows	41	na	no	yes	randomized block	2009-05-15	2009-06-30	2009-08-18	49	dates inferred from Table 2	yes	0.13	8	no insecticide	na
175	5	Seagraves2012	Seagraves, M. S. and J. G. Lundgren	2012	Journal of Pest Science	85: 125-132	Effects of neonicotinoid seed treatments on soybean aphid and its natural enemies	public	government/crop industry	yes	USA	North America	field	author	no	na	no	soybean	soybean	THX	THX/CLO	0.5	na	A 1702	not specified	na	na	Eastern SD Soil and Water Research Farm near Brookings	SD	1	2009	Seagraves2012-1-2009	author spreadsheet	plant pop 465,000 per ha; 76.2 cm rows	41	na	no	yes	randomized block	2009-05-15	2009-06-30	2009-08-18	49	dates inferred from Table 2	yes	0.13	8	no insecticide	na
176	5	Seagraves2012	Seagraves, M. S. and J. G. Lundgren	2012	Journal of Pest Science	85: 125-132	Effects of neonicotinoid seed treatments on soybean aphid and its natural enemies	public	government/crop industry	yes	USA	North America	field	author	no	na	no	soybean	soybean	THX	THX/CLO	0.5	na	A 1702	not specified	na	na	Eastern SD Soil and Water Research Farm near Brookings	SD	1	2009	Seagraves2012-1-2009	author spreadsheet	plant pop 465,000 per ha; 76.2 cm rows	41	na	no	yes	randomized block	2009-05-15	2009-06-30	2009-08-18	49	dates inferred from Table 2	yes	0.13	8	no insecticide	na
177	5	Seagraves2012	Seagraves, M. S. and J. G. Lundgren	2012	Journal of Pest Science	85: 125-132	Effects of neonicotinoid seed treatments on soybean aphid and its natural enemies	public	government/crop industry	yes	USA	North America	field	author	no	na	no	soybean	soybean	IMI	IMI	0.63	na	A 1702	not specified	na	na	Eastern SD Soil and Water Research Farm near Brookings	SD	2	2010	Seagraves2012-2-2010	author spreadsheet	plant pop 465,000 per ha; 76.2 cm rows	41	na	no	yes	randomized block	2010-05-27	2010-06-22	2010-08-18	57	dates inferred from Table 3	yes	0.13	8	no insecticide	na
178	5	Seagraves2012	Seagraves, M. S. and J. G. Lundgren	2012	Journal of Pest Science	85: 125-132	Effects of neonicotinoid seed treatments on soybean aphid and its natural enemies	public	government/crop industry	yes	USA	North America	field	author	no	na	no	soybean	soybean	IMI	IMI	0.63	na	A 1702	not specified	na	na	Eastern SD Soil and Water Research Farm near Brookings	SD	2	2010	Seagraves2012-2-2010	author spreadsheet	plant pop 465,000 per ha; 76.2 cm rows	41	na	no	yes	randomized block	2010-05-27	2010-06-22	2010-08-18	57	dates inferred from Table 4	yes	0.13	8	no insecticide	na
179	5	Seagraves2012	Seagraves, M. S. and J. G. Lundgren	2012	Journal of Pest Science	85: 125-132	Effects of neonicotinoid seed treatments on soybean aphid and its natural enemies	public	government/crop industry	yes	USA	North America	field	author	no	na	no	soybean	soybean	IMI	IMI	0.63	na	A 1702	not specified	na	na	Eastern SD Soil and Water Research Farm near Brookings	SD	2	2010	Seagraves2012-2-2010	author spreadsheet	plant pop 465,000 per ha; 76.2 cm rows	41	na	no	yes	randomized block	2010-05-27	2010-06-22	2010-08-18	57	dates inferred from Table 5	yes	0.13	8	no insecticide	na
180	5	Seagraves2012	Seagraves, M. S. and J. G. Lundgren	2012	Journal of Pest Science	85: 125-132	Effects of neonicotinoid seed treatments on soybean aphid and its natural enemies	public	government/crop industry	yes	USA	North America	field	author	no	na	no	soybean	soybean	IMI	IMI	0.63	na	A 1702	not specified	na	na	Eastern SD Soil and Water Research Farm near Brookings	SD	2	2010	Seagraves2012-2-2010	author spreadsheet	plant pop 465,000 per ha; 76.2 cm rows	41	na	no	yes	randomized block	2010-05-27	2010-06-22	2010-08-18	57	dates inferred from Table 6	yes	0.13	8	no insecticide	na
181	5	Seagraves2012	Seagraves, M. S. and J. G. Lundgren	2012	Journal of Pest Science	85: 125-132	Effects of neonicotinoid seed treatments on soybean aphid and its natural enemies	public	government/crop industry	yes	USA	North America	field	author	no	na	no	soybean	soybean	IMI	IMI	0.63	na	A 1702	not specified	na	na	Eastern SD Soil and Water Research Farm near Brookings	SD	2	2010	Seagraves2012-2-2010	author spreadsheet	plant pop 465,000 per ha; 76.2 cm rows	41	na	no	yes	randomized block	2010-05-27	2010-06-22	2010-08-18	57	dates inferred from Table 7	yes	0.13	8	no insecticide	na
182	5	Seagraves2012	Seagraves, M. S. and J. G. Lundgren	2012	Journal of Pest Science	85: 125-132	Effects of neonicotinoid seed treatments on soybean aphid and its natural enemies	public	government/crop industry	yes	USA	North America	field	author	no	na	no	soybean	soybean	IMI	IMI	0.63	na	A 1702	not specified	na	na	Eastern SD Soil and Water Research Farm near Brookings	SD	2	2010	Seagraves2012-2-2010	author spreadsheet	plant pop 465,000 per ha; 76.2 cm rows	41	na	no	yes	randomized block	2010-05-27	2010-06-22	2010-08-18	57	dates inferred from Table 8	yes	0.13	8	no insecticide	na
183	5	Seagraves2012	Seagraves, M. S. and J. G. Lundgren	2012	Journal of Pest Science	85: 125-132	Effects of neonicotinoid seed treatments on soybean aphid and its natural enemies	public	government/crop industry	yes	USA	North America	field	author	no	na	no	soybean	soybean	IMI	IMI	0.63	na	A 1702	not specified	na	na	Eastern SD Soil and Water Research Farm near Brookings	SD	2	2010	Seagraves2012-2-2010	author spreadsheet	plant pop 465,000 per ha; 76.2 cm rows	41	na	no	yes	randomized block	2010-05-27	2010-06-22	2010-08-18	57	dates inferred from Table 9	yes	0.13	8	no insecticide	na
184	5	Seagraves2012	Seagraves, M. S. and J. G. Lundgren	2012	Journal of Pest Science	85: 125-132	Effects of neonicotinoid seed treatments on soybean aphid and its natural enemies	public	government/crop industry	yes	USA	North America	field	author	no	na	no	soybean	soybean	IMI	IMI	0.63	na	A 1702	not specified	na	na	Eastern SD Soil and Water Research Farm near Brookings	SD	2	2010	Seagraves2012-2-2010	author spreadsheet	plant pop 465,000 per ha; 76.2 cm rows	41	na	no	yes	randomized block	2010-05-27	2010-06-22	2010-08-18	57	dates inferred from Table 10	yes	0.13	8	no insecticide	na
185	5	Seagraves2012	Seagraves, M. S. and J. G. Lundgren	2012	Journal of Pest Science	85: 125-132	Effects of neonicotinoid seed treatments on soybean aphid and its natural enemies	public	government/crop industry	yes	USA	North America	field	author	no	na	no	soybean	soybean	THX	THX/CLO	0.5	na	A 1702	not specified	na	na	Eastern SD Soil and Water Research Farm near Brookings	SD	2	2010	Seagraves2012-2-2010	author spreadsheet	plant pop 465,000 per ha; 76.2 cm rows	41	na	no	yes	randomized block	2010-05-27	2010-06-22	2010-08-18	57	dates inferred from Table 11	yes	0.13	8	no insecticide	na
186	5	Seagraves2012	Seagraves, M. S. and J. G. Lundgren	2012	Journal of Pest Science	85: 125-132	Effects of neonicotinoid seed treatments on soybean aphid and its natural enemies	public	government/crop industry	yes	USA	North America	field	author	no	na	no	soybean	soybean	THX	THX/CLO	0.5	na	A 1702	not specified	na	na	Eastern SD Soil and Water Research Farm near Brookings	SD	2	2010	Seagraves2012-2-2010	author spreadsheet	plant pop 465,000 per ha; 76.2 cm rows	41	na	no	yes	randomized block	2010-05-27	2010-06-22	2010-08-18	57	dates inferred from Table 12	yes	0.13	8	no insecticide	na
187	5	Seagraves2012	Seagraves, M. S. and J. G. Lundgren	2012	Journal of Pest Science	85: 125-132	Effects of neonicotinoid seed treatments on soybean aphid and its natural enemies	public	government/crop industry	yes	USA	North America	field	author	no	na	no	soybean	soybean	THX	THX/CLO	0.5	na	A 1702	not specified	na	na	Eastern SD Soil and Water Research Farm near Brookings	SD	2	2010	Seagraves2012-2-2010	author spreadsheet	plant pop 465,000 per ha; 76.2 cm rows	41	na	no	yes	randomized block	2010-05-27	2010-06-22	2010-08-18	57	dates inferred from Table 13	yes	0.13	8	no insecticide	na
188	5	Seagraves2012	Seagraves, M. S. and J. G. Lundgren	2012	Journal of Pest Science	85: 125-132	Effects of neonicotinoid seed treatments on soybean aphid and its natural enemies	public	government/crop industry	yes	USA	North America	field	author	no	na	no	soybean	soybean	THX	THX/CLO	0.5	na	A 1702	not specified	na	na	Eastern SD Soil and Water Research Farm near Brookings	SD	2	2010	Seagraves2012-2-2010	author spreadsheet	plant pop 465,000 per ha; 76.2 cm rows	41	na	no	yes	randomized block	2010-05-27	2010-06-22	2010-08-18	57	dates inferred from Table 14	yes	0.13	8	no insecticide	na
189	5	Seagraves2012	Seagraves, M. S. and J. G. Lundgren	2012	Journal of Pest Science	85: 125-132	Effects of neonicotinoid seed treatments on soybean aphid and its natural enemies	public	government/crop industry	yes	USA	North America	field	author	no	na	no	soybean	soybean	THX	THX/CLO	0.5	na	A 1702	not specified	na	na	Eastern SD Soil and Water Research Farm near Brookings	SD	2	2010	Seagraves2012-2-2010	author spreadsheet	plant pop 465,000 per ha; 76.2 cm rows	41	na	no	yes	randomized block	2010-05-27	2010-06-22	2010-08-18	57	dates inferred from Table 15	yes	0.13	8	no insecticide	na
190	5	Seagraves2012	Seagraves, M. S. and J. G. Lundgren	2012	Journal of Pest Science	85: 125-132	Effects of neonicotinoid seed treatments on soybean aphid and its natural enemies	public	government/crop industry	yes	USA	North America	field	author	no	na	no	soybean	soybean	THX	THX/CLO	0.5	na	A 1702	not specified	na	na	Eastern SD Soil and Water Research Farm near Brookings	SD	2	2010	Seagraves2012-2-2010	author spreadsheet	plant pop 465,000 per ha; 76.2 cm rows	41	na	no	yes	randomized block	2010-05-27	2010-06-22	2010-08-18	57	dates inferred from Table 16	yes	0.13	8	no insecticide	na
191	5	Seagraves2012	Seagraves, M. S. and J. G. Lundgren	2012	Journal of Pest Science	85: 125-132	Effects of neonicotinoid seed treatments on soybean aphid and its natural enemies	public	government/crop industry	yes	USA	North America	field	author	no	na	no	soybean	soybean	THX	THX/CLO	0.5	na	A 1702	not specified	na	na	Eastern SD Soil and Water Research Farm near Brookings	SD	2	2010	Seagraves2012-2-2010	author spreadsheet	plant pop 465,000 per ha; 76.2 cm rows	41	na	no	yes	randomized block	2010-05-27	2010-06-22	2010-08-18	57	dates inferred from Table 17	yes	0.13	8	no insecticide	na
192	5	Seagraves2012	Seagraves, M. S. and J. G. Lundgren	2012	Journal of Pest Science	85: 125-132	Effects of neonicotinoid seed treatments on soybean aphid and its natural enemies	public	government/crop industry	yes	USA	North America	field	author	no	na	no	soybean	soybean	THX	THX/CLO	0.5	na	A 1702	not specified	na	na	Eastern SD Soil and Water Research Farm near Brookings	SD	2	2010	Seagraves2012-2-2010	author spreadsheet	plant pop 465,000 per ha; 76.2 cm rows	41	na	no	yes	randomized block	2010-05-27	2010-06-22	2010-08-18	57	dates inferred from Table 18	yes	0.13	8	no insecticide	na
193	6	Tinsley2012	Tinsley, N. A., K. L. Steffey, R. E. Estes, J. R. Heeren, M. E. Gray, and B. W. Diers	2012	Journal of Applied Entomology	136(5): 361-371	Field-level effects of preventative management tactics on soybean aphids (Aphis glycines Matsumura) and their predators	public/private	crop industry	yes	USA	North America	field	study	no	na	no	soybean	soybean	THX	THX/CLO	0.5	na	GR-2332	not specified	na	na	near Sterling	IL	1	2007	Tinsley2012-1-2007	Table 3	plant pop 309,000; tilled; planted with 4-row planter at 76.2 cm spacing; detail on herbicides in methods	70	na	no	yes	randomized block	2007-05-24	2007-07-23	2007-09-12	51	na	no	0	8	no insecticide	na
194	6	Tinsley2012	Tinsley, N. A., K. L. Steffey, R. E. Estes, J. R. Heeren, M. E. Gray, and B. W. Diers	2012	Journal of Applied Entomology	136(5): 361-371	Field-level effects of preventative management tactics on soybean aphids (Aphis glycines Matsumura) and their predators	public/private	crop industry	yes	USA	North America	field	study	no	na	no	soybean	soybean	THX	THX/CLO	0.5	na	GR-2332	not specified	na	na	near Sterling	IL	1	2007	Tinsley2012-1-2007	Table 3	plant pop 309,000; tilled; planted with 4-row planter at 76.2 cm spacing; detail on herbicides in methods	70	na	no	yes	randomized block	2007-05-24	2007-07-23	2007-09-12	51	na	no	0	8	no insecticide	na
195	6	Tinsley2012	Tinsley, N. A., K. L. Steffey, R. E. Estes, J. R. Heeren, M. E. Gray, and B. W. Diers	2012	Journal of Applied Entomology	136(5): 361-371	Field-level effects of preventative management tactics on soybean aphids (Aphis glycines Matsumura) and their predators	public/private	crop industry	yes	USA	North America	field	study	no	na	no	soybean	soybean	THX	THX/CLO	0.5	na	GR-2332	not specified	na	na	near Sterling	IL	1	2007	Tinsley2012-1-2007	Table 3	plant pop 309,000; tilled; planted with 4-row planter at 76.2 cm spacing; detail on herbicides in methods	70	na	no	yes	randomized block	2007-05-24	2007-07-23	2007-09-12	51	na	no	0	8	no insecticide	na
196	6	Tinsley2012	Tinsley, N. A., K. L. Steffey, R. E. Estes, J. R. Heeren, M. E. Gray, and B. W. Diers	2012	Journal of Applied Entomology	136(5): 361-371	Field-level effects of preventative management tactics on soybean aphids (Aphis glycines Matsumura) and their predators	public/private	crop industry	yes	USA	North America	field	study	no	na	no	soybean	soybean	THX	THX/CLO	0.5	na	GR-2332	not specified	na	na	near Sterling	IL	1	2007	Tinsley2012-1-2007	Table 3	plant pop 309,000; tilled; planted with 4-row planter at 76.2 cm spacing; detail on herbicides in methods	70	na	no	yes	randomized block	2007-05-24	2007-07-23	2007-09-12	51	na	no	0	8	no insecticide	na
197	6	Tinsley2012	Tinsley, N. A., K. L. Steffey, R. E. Estes, J. R. Heeren, M. E. Gray, and B. W. Diers	2012	Journal of Applied Entomology	136(5): 361-371	Field-level effects of preventative management tactics on soybean aphids (Aphis glycines Matsumura) and their predators	public/private	crop industry	yes	USA	North America	field	study	no	na	no	soybean	soybean	THX	THX/CLO	0.5	na	GR-2332	not specified	na	na	near Morrison	IL	2	2008	Tinsley2012-2-2008	Table 3	plant pop 309,000; tilled; planted with 4-row planter at 76.2 cm spacing; detail on herbicides in methods	70	na	no	yes	randomized block	2008-05-20	2008-08-06	2008-09-11	36	na	no	0	6	no insecticide	na
198	6	Tinsley2012	Tinsley, N. A., K. L. Steffey, R. E. Estes, J. R. Heeren, M. E. Gray, and B. W. Diers	2012	Journal of Applied Entomology	136(5): 361-371	Field-level effects of preventative management tactics on soybean aphids (Aphis glycines Matsumura) and their predators	public/private	crop industry	yes	USA	North America	field	study	no	na	no	soybean	soybean	THX	THX/CLO	0.5	na	GR-2332	not specified	na	na	near Morrison	IL	2	2008	Tinsley2012-2-2008	Table 3	plant pop 309,000; tilled; planted with 4-row planter at 76.2 cm spacing; detail on herbicides in methods	70	na	no	yes	randomized block	2008-05-20	2008-08-06	2008-09-11	36	na	no	0	6	no insecticide	na
199	6	Tinsley2012	Tinsley, N. A., K. L. Steffey, R. E. Estes, J. R. Heeren, M. E. Gray, and B. W. Diers	2012	Journal of Applied Entomology	136(5): 361-371	Field-level effects of preventative management tactics on soybean aphids (Aphis glycines Matsumura) and their predators	public/private	crop industry	yes	USA	North America	field	study	no	na	no	soybean	soybean	THX	THX/CLO	0.5	na	GR-2332	not specified	na	na	near Morrison	IL	2	2008	Tinsley2012-2-2008	Table 3	plant pop 309,000; tilled; planted with 4-row planter at 76.2 cm spacing; detail on herbicides in methods	70	na	no	yes	randomized block	2008-05-20	2008-08-06	2008-09-11	36	na	no	0	6	no insecticide	na
200	6	Tinsley2012	Tinsley, N. A., K. L. Steffey, R. E. Estes, J. R. Heeren, M. E. Gray, and B. W. Diers	2012	Journal of Applied Entomology	136(5): 361-371	Field-level effects of preventative management tactics on soybean aphids (Aphis glycines Matsumura) and their predators	public/private	crop industry	yes	USA	North America	field	study	no	na	no	soybean	soybean	THX	THX/CLO	0.5	na	GR-2332	not specified	na	na	near Morrison	IL	2	2008	Tinsley2012-2-2008	Table 3	plant pop 309,000; tilled; planted with 4-row planter at 76.2 cm spacing; detail on herbicides in methods	70	na	no	yes	randomized block	2008-05-20	2008-08-06	2008-09-11	36	na	no	0	6	no insecticide	na
241	8	delaPoza2005Farinos2008	Farinos, G. P., M. de la Poza, P. Hernandez-Crespo, F. Ortega, and P. Castanera	2008	Biological Control	44: 362-371	Diversity and seasonal phenology of aboveground arthropods in conventional and transgenic maize crops in Central Spain	public	government	yes	Spain	Europe	field	study	yes	extracted from graph 3 times and took average to get value	yes	maize	maize	IMI	IMI	4.9	na	Dracma	no	na	na	commercial maize field	Madrid	1	2000	delaPoza2005Farinos2008-1-2000	Figure 1	maintained according to conventional local farming practices, but without spraying insecticide; postemergence herbicide sprayed after sowing	5500	block size was between 0.5 and 0.6 ha depending on year, but not specified; inferred plot size b/c 3 plots per block	yes	yes	randomized block	2000-04-13	2000-06-20	2000-09-26	98	duration is inferred from methods and Fig. 1	no	0	8	no insecticide	na
242	8	delaPoza2005Farinos2008	Farinos, G. P., M. de la Poza, P. Hernandez-Crespo, F. Ortega, and P. Castanera	2008	Biological Control	44: 362-371	Diversity and seasonal phenology of aboveground arthropods in conventional and transgenic maize crops in Central Spain	public	government	yes	Spain	Europe	field	study	yes	extracted from graph 3 times and took average to get value	yes	maize	maize	IMI	IMI	4.9	na	Dracma	no	na	na	commercial maize field	Madrid	1	2000	delaPoza2005Farinos2008-1-2000	Figure 1	maintained according to conventional local farming practices, but without spraying insecticide; postemergence herbicide sprayed after sowing	5500	block size was between 0.5 and 0.6 ha depending on year, but not specified; inferred plot size b/c 3 plots per block	yes	yes	randomized block	2000-04-13	2000-06-20	2000-09-26	98	duration is inferred from methods and Fig. 1	no	0	8	no insecticide	na
243	8	delaPoza2005Farinos2008	Farinos, G. P., M. de la Poza, P. Hernandez-Crespo, F. Ortega, and P. Castanera	2008	Biological Control	44: 362-371	Diversity and seasonal phenology of aboveground arthropods in conventional and transgenic maize crops in Central Spain	public	government	yes	Spain	Europe	field	study	yes	extracted from graph 3 times and took average to get value	yes	maize	maize	IMI	IMI	4.9	na	Dracma	no	na	na	commercial maize field	Madrid	1	2000	delaPoza2005Farinos2008-1-2000	Figure 1	maintained according to conventional local farming practices, but without spraying insecticide; postemergence herbicide sprayed after sowing	5500	block size was between 0.5 and 0.6 ha depending on year, but not specified; inferred plot size b/c 3 plots per block	yes	yes	randomized block	2000-04-13	2000-06-20	2000-09-26	98	duration is inferred from methods and Fig. 1	no	0	8	no insecticide	na
244	8	delaPoza2005Farinos2008	Farinos, G. P., M. de la Poza, P. Hernandez-Crespo, F. Ortega, and P. Castanera	2008	Biological Control	44: 362-371	Diversity and seasonal phenology of aboveground arthropods in conventional and transgenic maize crops in Central Spain	public	government	yes	Spain	Europe	field	study	yes	extracted from graph 3 times and took average to get value	yes	maize	maize	IMI	IMI	4.9	na	Dracma	no	na	na	commercial maize field	Madrid	1	2000	delaPoza2005Farinos2008-1-2000	Figure 1	maintained according to conventional local farming practices, but without spraying insecticide; postemergence herbicide sprayed after sowing	5500	block size was between 0.5 and 0.6 ha depending on year, but not specified; inferred plot size b/c 3 plots per block	yes	yes	randomized block	2000-04-13	2000-06-20	2000-09-26	98	duration is inferred from methods and Fig. 1	no	0	8	no insecticide	na
245	8	delaPoza2005Farinos2008	Farinos, G. P., M. de la Poza, P. Hernandez-Crespo, F. Ortega, and P. Castanera	2008	Biological Control	44: 362-371	Diversity and seasonal phenology of aboveground arthropods in conventional and transgenic maize crops in Central Spain	public	government	yes	Spain	Europe	field	study	yes	extracted from graph 3 times and took average to get value	yes	maize	maize	IMI	IMI	4.9	na	Dracma	no	na	na	commercial maize field	Madrid	1	2000	delaPoza2005Farinos2008-1-2000	Figure 1	maintained according to conventional local farming practices, but without spraying insecticide; postemergence herbicide sprayed after sowing	5500	block size was between 0.5 and 0.6 ha depending on year, but not specified; inferred plot size b/c 3 plots per block	yes	yes	randomized block	2000-04-13	2000-06-20	2000-09-26	98	duration is inferred from methods and Fig. 1	no	0	8	no insecticide	na
246	8	delaPoza2005Farinos2008	Farinos, G. P., M. de la Poza, P. Hernandez-Crespo, F. Ortega, and P. Castanera	2008	Biological Control	44: 362-371	Diversity and seasonal phenology of aboveground arthropods in conventional and transgenic maize crops in Central Spain	public	government	yes	Spain	Europe	field	study	yes	extracted from graph 3 times and took average to get value	yes	maize	maize	IMI	IMI	4.9	na	Dracma	no	na	na	commercial maize field	Madrid	1	2001	delaPoza2005Farinos2008-1-2001	Figure 1	maintained according to conventional local farming practices, but without spraying insecticide; postemergence herbicide sprayed after sowing	5500	block size was between 0.5 and 0.6 ha depending on year, but not specified; inferred plot size b/c 3 plots per block	yes	yes	randomized block	2001-04-19	2001-06-21	2001-09-27	98	duration is inferred from methods and Fig. 2	no	0	8	no insecticide	na
247	8	delaPoza2005Farinos2008	Farinos, G. P., M. de la Poza, P. Hernandez-Crespo, F. Ortega, and P. Castanera	2008	Biological Control	44: 362-371	Diversity and seasonal phenology of aboveground arthropods in conventional and transgenic maize crops in Central Spain	public	government	yes	Spain	Europe	field	study	yes	extracted from graph 3 times and took average to get value	yes	maize	maize	IMI	IMI	4.9	na	Dracma	no	na	na	commercial maize field	Madrid	1	2001	delaPoza2005Farinos2008-1-2001	Figure 1	maintained according to conventional local farming practices, but without spraying insecticide; postemergence herbicide sprayed after sowing	5500	block size was between 0.5 and 0.6 ha depending on year, but not specified; inferred plot size b/c 3 plots per block	yes	yes	randomized block	2001-04-19	2001-06-21	2001-09-27	98	duration is inferred from methods and Fig. 2	no	0	8	no insecticide	na
248	8	delaPoza2005Farinos2008	Farinos, G. P., M. de la Poza, P. Hernandez-Crespo, F. Ortega, and P. Castanera	2008	Biological Control	44: 362-371	Diversity and seasonal phenology of aboveground arthropods in conventional and transgenic maize crops in Central Spain	public	government	yes	Spain	Europe	field	study	yes	extracted from graph 3 times and took average to get value	yes	maize	maize	IMI	IMI	4.9	na	Dracma	no	na	na	commercial maize field	Madrid	1	2001	delaPoza2005Farinos2008-1-2001	Figure 1	maintained according to conventional local farming practices, but without spraying insecticide; postemergence herbicide sprayed after sowing	5500	block size was between 0.5 and 0.6 ha depending on year, but not specified; inferred plot size b/c 3 plots per block	yes	yes	randomized block	2001-04-19	2001-06-21	2001-09-27	98	duration is inferred from methods and Fig. 2	no	0	8	no insecticide	na
249	8	delaPoza2005Farinos2008	Farinos, G. P., M. de la Poza, P. Hernandez-Crespo, F. Ortega, and P. Castanera	2008	Biological Control	44: 362-371	Diversity and seasonal phenology of aboveground arthropods in conventional and transgenic maize crops in Central Spain	public	government	yes	Spain	Europe	field	study	yes	extracted from graph 3 times and took average to get value	yes	maize	maize	IMI	IMI	4.9	na	Dracma	no	na	na	commercial maize field	Madrid	1	2001	delaPoza2005Farinos2008-1-2001	Figure 1	maintained according to conventional local farming practices, but without spraying insecticide; postemergence herbicide sprayed after sowing	5500	block size was between 0.5 and 0.6 ha depending on year, but not specified; inferred plot size b/c 3 plots per block	yes	yes	randomized block	2001-04-19	2001-06-21	2001-09-27	98	duration is inferred from methods and Fig. 2	no	0	8	no insecticide	na
250	8	delaPoza2005Farinos2008	Farinos, G. P., M. de la Poza, P. Hernandez-Crespo, F. Ortega, and P. Castanera	2008	Biological Control	44: 362-371	Diversity and seasonal phenology of aboveground arthropods in conventional and transgenic maize crops in Central Spain	public	government	yes	Spain	Europe	field	study	yes	extracted from graph 3 times and took average to get value	yes	maize	maize	IMI	IMI	4.9	na	Dracma	no	na	na	commercial maize field	Madrid	1	2001	delaPoza2005Farinos2008-1-2001	Figure 1	maintained according to conventional local farming practices, but without spraying insecticide; postemergence herbicide sprayed after sowing	5500	block size was between 0.5 and 0.6 ha depending on year, but not specified; inferred plot size b/c 3 plots per block	yes	yes	randomized block	2001-04-19	2001-06-21	2001-09-27	98	duration is inferred from methods and Fig. 2	no	0	8	no insecticide	na
251	8	delaPoza2005Farinos2008	Farinos, G. P., M. de la Poza, P. Hernandez-Crespo, F. Ortega, and P. Castanera	2008	Biological Control	44: 362-371	Diversity and seasonal phenology of aboveground arthropods in conventional and transgenic maize crops in Central Spain	public	government	yes	Spain	Europe	field	study	yes	extracted from graph 3 times and took average to get value	yes	maize	maize	IMI	IMI	4.9	na	Dracma	no	na	na	commercial maize field	Madrid	1	2002	delaPoza2005Farinos2008-1-2002	Figure 1	maintained according to conventional local farming practices, but without spraying insecticide; postemergence herbicide sprayed after sowing	5500	block size was between 0.5 and 0.6 ha depending on year, but not specified; inferred plot size b/c 3 plots per block	yes	yes	randomized block	2002-04-09	2002-06-13	2002-09-19	98	duration is inferred from methods and Fig. 3	no	0	8	no insecticide	na
252	8	delaPoza2005Farinos2008	Farinos, G. P., M. de la Poza, P. Hernandez-Crespo, F. Ortega, and P. Castanera	2008	Biological Control	44: 362-371	Diversity and seasonal phenology of aboveground arthropods in conventional and transgenic maize crops in Central Spain	public	government	yes	Spain	Europe	field	study	yes	extracted from graph 3 times and took average to get value	yes	maize	maize	IMI	IMI	4.9	na	Dracma	no	na	na	commercial maize field	Madrid	1	2002	delaPoza2005Farinos2008-1-2002	Figure 1	maintained according to conventional local farming practices, but without spraying insecticide; postemergence herbicide sprayed after sowing	5500	block size was between 0.5 and 0.6 ha depending on year, but not specified; inferred plot size b/c 3 plots per block	yes	yes	randomized block	2002-04-09	2002-06-13	2002-09-19	98	duration is inferred from methods and Fig. 3	no	0	8	no insecticide	na
253	8	delaPoza2005Farinos2008	Farinos, G. P., M. de la Poza, P. Hernandez-Crespo, F. Ortega, and P. Castanera	2008	Biological Control	44: 362-371	Diversity and seasonal phenology of aboveground arthropods in conventional and transgenic maize crops in Central Spain	public	government	yes	Spain	Europe	field	study	yes	extracted from graph 3 times and took average to get value	yes	maize	maize	IMI	IMI	4.9	na	Dracma	no	na	na	commercial maize field	Madrid	1	2002	delaPoza2005Farinos2008-1-2002	Figure 1	maintained according to conventional local farming practices, but without spraying insecticide; postemergence herbicide sprayed after sowing	5500	block size was between 0.5 and 0.6 ha depending on year, but not specified; inferred plot size b/c 3 plots per block	yes	yes	randomized block	2002-04-09	2002-06-13	2002-09-19	98	duration is inferred from methods and Fig. 3	no	0	8	no insecticide	na
254	8	delaPoza2005Farinos2008	Farinos, G. P., M. de la Poza, P. Hernandez-Crespo, F. Ortega, and P. Castanera	2008	Biological Control	44: 362-371	Diversity and seasonal phenology of aboveground arthropods in conventional and transgenic maize crops in Central Spain	public	government	yes	Spain	Europe	field	study	yes	extracted from graph 3 times and took average to get value	yes	maize	maize	IMI	IMI	4.9	na	Dracma	no	na	na	commercial maize field	Madrid	1	2002	delaPoza2005Farinos2008-1-2002	Figure 1	maintained according to conventional local farming practices, but without spraying insecticide; postemergence herbicide sprayed after sowing	5500	block size was between 0.5 and 0.6 ha depending on year, but not specified; inferred plot size b/c 3 plots per block	yes	yes	randomized block	2002-04-09	2002-06-13	2002-09-19	98	duration is inferred from methods and Fig. 3	no	0	8	no insecticide	na
255	8	delaPoza2005Farinos2008	Farinos, G. P., M. de la Poza, P. Hernandez-Crespo, F. Ortega, and P. Castanera	2008	Biological Control	44: 362-371	Diversity and seasonal phenology of aboveground arthropods in conventional and transgenic maize crops in Central Spain	public	government	yes	Spain	Europe	field	study	yes	extracted from graph 3 times and took average to get value	yes	maize	maize	IMI	IMI	4.9	na	Dracma	no	na	na	commercial maize field	Madrid	1	2002	delaPoza2005Farinos2008-1-2002	Figure 1	maintained according to conventional local farming practices, but without spraying insecticide; postemergence herbicide sprayed after sowing	5500	block size was between 0.5 and 0.6 ha depending on year, but not specified; inferred plot size b/c 3 plots per block	yes	yes	randomized block	2002-04-09	2002-06-13	2002-09-19	98	duration is inferred from methods and Fig. 3	no	0	8	no insecticide	na
271	9	Echegaray2009	Echegaray, F. J.	2009	Masters Thesis, Royal Roads University	na	Environmental effects of insecticides on nontarget predator and parasitoid insects	public	not specified	no	Canada	North America	field	study	no	na	no	canola	other	IMI	IMI	5.68	na	unclear	not specified	na	na	rented land near Lethbridge	Alberta	1	2000	Echegaray2009-1-2000	Table 13	not specified	100	na	no	yes	randomized block	2000-06-20	2000-06-20	2000-08-25	66	duration from on info in methods and results; # of samples estimated from methods	yes	0.2	5	no insecticide	na
272	9	Echegaray2009	Echegaray, F. J.	2009	Masters Thesis, Royal Roads University	na	Environmental effects of insecticides on nontarget predator and parasitoid insects	public	not specified	no	Canada	North America	field	study	no	na	no	canola	other	IMI	IMI	5.68	na	unclear	not specified	na	na	rented land near Lethbridge	Alberta	1	2000	Echegaray2009-1-2000	Table 13	not specified	100	na	no	yes	randomized block	2000-06-20	2000-06-20	2000-08-25	66	duration from on info in methods and results; # of samples estimated from methods	yes	0.2	5	no insecticide	na
273	9	Echegaray2009	Echegaray, F. J.	2009	Masters Thesis, Royal Roads University	na	Environmental effects of insecticides on nontarget predator and parasitoid insects	public	not specified	no	Canada	North America	field	study	no	na	no	canola	other	IMI	IMI	5.68	na	unclear	not specified	na	na	rented land near Lethbridge	Alberta	1	2000	Echegaray2009-1-2000	Table 13	not specified	100	na	no	yes	randomized block	2000-06-20	2000-06-20	2000-08-25	66	duration from on info in methods and results; # of samples estimated from methods	yes	0.2	5	no insecticide	na
274	9	Echegaray2009	Echegaray, F. J.	2009	Masters Thesis, Royal Roads University	na	Environmental effects of insecticides on nontarget predator and parasitoid insects	public	not specified	no	Canada	North America	field	study	no	na	no	canola	other	IMI	IMI	5.68	na	unclear	not specified	na	na	rented land near Lethbridge	Alberta	1	2000	Echegaray2009-1-2000	Table 13	not specified	100	na	no	yes	randomized block	2000-06-20	2000-06-20	2000-08-25	66	duration from on info in methods and results; # of samples estimated from methods	yes	0.2	5	no insecticide	na
275	9	Echegaray2009	Echegaray, F. J.	2009	Masters Thesis, Royal Roads University	na	Environmental effects of insecticides on nontarget predator and parasitoid insects	public	not specified	no	Canada	North America	field	study	no	na	no	canola	other	IMI	IMI	5.68	na	unclear	not specified	na	na	rented land near Lethbridge	Alberta	1	2000	Echegaray2009-1-2000	Table 13	not specified	100	na	no	yes	randomized block	2000-06-20	2000-06-20	2000-08-25	66	duration from on info in methods and results; # of samples estimated from methods	yes	0.2	5	no insecticide	na
276	9	Echegaray2009	Echegaray, F. J.	2009	Masters Thesis, Royal Roads University	na	Environmental effects of insecticides on nontarget predator and parasitoid insects	public	not specified	no	Canada	North America	field	study	no	na	no	canola	other	IMI	IMI	5.68	na	unclear	not specified	na	na	rented land near Lethbridge	Alberta	1	2000	Echegaray2009-1-2000	Table 13	not specified	100	na	no	yes	randomized block	2000-06-20	2000-06-20	2000-08-25	66	duration from on info in methods and results; # of samples estimated from methods	yes	0.2	5	no insecticide	na
277	9	Echegaray2009	Echegaray, F. J.	2009	Masters Thesis, Royal Roads University	na	Environmental effects of insecticides on nontarget predator and parasitoid insects	public	not specified	no	Canada	North America	field	study	no	na	no	canola	other	IMI	IMI	5.68	na	unclear	not specified	na	na	rented land near Lethbridge	Alberta	1	2000	Echegaray2009-1-2000	Table 13	not specified	100	na	no	yes	randomized block	2000-06-20	2000-06-20	2000-08-25	66	duration from on info in methods and results; # of samples estimated from methods	yes	0.2	5	no insecticide	na
292	9	Echegaray2009	Echegaray, F. J.	2009	Masters Thesis, Royal Roads University	na	Environmental effects of insecticides on nontarget predator and parasitoid insects	public	not specified	no	Canada	North America	field	study	no	na	no	canola	other	IMI	IMI	5.68	na	unclear	not specified	na	na	rented land near Lethbridge	Alberta	1	2001	Echegaray2009-1-2001	Table 13	not specified	100	na	no	yes	randomized block	2001-06-15	2001-06-15	2001-09-06	83	duration from on info in methods and results; # of samples estimated from methods	yes	0.2	6	no insecticide	na
293	9	Echegaray2009	Echegaray, F. J.	2009	Masters Thesis, Royal Roads University	na	Environmental effects of insecticides on nontarget predator and parasitoid insects	public	not specified	no	Canada	North America	field	study	no	na	no	canola	other	IMI	IMI	5.68	na	unclear	not specified	na	na	rented land near Lethbridge	Alberta	1	2001	Echegaray2009-1-2001	Table 13	not specified	100	na	no	yes	randomized block	2001-06-15	2001-06-15	2001-09-06	83	duration from on info in methods and results; # of samples estimated from methods	yes	0.2	6	no insecticide	na
294	9	Echegaray2009	Echegaray, F. J.	2009	Masters Thesis, Royal Roads University	na	Environmental effects of insecticides on nontarget predator and parasitoid insects	public	not specified	no	Canada	North America	field	study	no	na	no	canola	other	IMI	IMI	5.68	na	unclear	not specified	na	na	rented land near Lethbridge	Alberta	1	2001	Echegaray2009-1-2001	Table 13	not specified	100	na	no	yes	randomized block	2001-06-15	2001-06-15	2001-09-06	83	duration from on info in methods and results; # of samples estimated from methods	yes	0.2	6	no insecticide	na
295	9	Echegaray2009	Echegaray, F. J.	2009	Masters Thesis, Royal Roads University	na	Environmental effects of insecticides on nontarget predator and parasitoid insects	public	not specified	no	Canada	North America	field	study	no	na	no	canola	other	IMI	IMI	5.68	na	unclear	not specified	na	na	rented land near Lethbridge	Alberta	1	2001	Echegaray2009-1-2001	Table 13	not specified	100	na	no	yes	randomized block	2001-06-15	2001-06-15	2001-09-06	83	duration from on info in methods and results; # of samples estimated from methods	yes	0.2	6	no insecticide	na
296	9	Echegaray2009	Echegaray, F. J.	2009	Masters Thesis, Royal Roads University	na	Environmental effects of insecticides on nontarget predator and parasitoid insects	public	not specified	no	Canada	North America	field	study	no	na	no	canola	other	IMI	IMI	5.68	na	unclear	not specified	na	na	rented land near Lethbridge	Alberta	1	2001	Echegaray2009-1-2001	Table 13	not specified	100	na	no	yes	randomized block	2001-06-15	2001-06-15	2001-09-06	83	duration from on info in methods and results; # of samples estimated from methods	yes	0.2	6	no insecticide	na
297	9	Echegaray2009	Echegaray, F. J.	2009	Masters Thesis, Royal Roads University	na	Environmental effects of insecticides on nontarget predator and parasitoid insects	public	not specified	no	Canada	North America	field	study	no	na	no	canola	other	IMI	IMI	5.68	na	unclear	not specified	na	na	rented land near Lethbridge	Alberta	1	2001	Echegaray2009-1-2001	Table 13	not specified	100	na	no	yes	randomized block	2001-06-15	2001-06-15	2001-09-06	83	duration from on info in methods and results; # of samples estimated from methods	yes	0.2	6	no insecticide	na
298	9	Echegaray2009	Echegaray, F. J.	2009	Masters Thesis, Royal Roads University	na	Environmental effects of insecticides on nontarget predator and parasitoid insects	public	not specified	no	Canada	North America	field	study	no	na	no	canola	other	IMI	IMI	5.68	na	unclear	not specified	na	na	rented land near Lethbridge	Alberta	1	2001	Echegaray2009-1-2001	Table 13	not specified	100	na	no	yes	randomized block	2001-06-15	2001-06-15	2001-09-06	83	duration from on info in methods and results; # of samples estimated from methods	yes	0.2	6	no insecticide	na
313	9	Echegaray2009	Echegaray, F. J.	2009	Masters Thesis, Royal Roads University	na	Environmental effects of insecticides on nontarget predator and parasitoid insects	public	not specified	no	Canada	North America	field	study	no	na	no	canola	other	IMI	IMI	5.68	na	unclear	not specified	na	na	field near the town of Vauxhall	Alberta	2	2002	Echegaray2009-2-2002	Table 13	not specified	752	weighted average; 2 reps were 22X24 and one was 50X24m	yes	yes	randomized block	2002-05-27	2002-05-27	2002-09-18	114	duration from on info in methods and results; # of samples estimated from methods	yes	0.2	8	no insecticide	na
314	9	Echegaray2009	Echegaray, F. J.	2009	Masters Thesis, Royal Roads University	na	Environmental effects of insecticides on nontarget predator and parasitoid insects	public	not specified	no	Canada	North America	field	study	no	na	no	canola	other	IMI	IMI	5.68	na	unclear	not specified	na	na	field near the town of Vauxhall	Alberta	2	2002	Echegaray2009-2-2002	Table 13	not specified	752	weighted average; 2 reps were 22X24 and one was 50X24m	yes	yes	randomized block	2002-05-27	2002-05-27	2002-09-18	114	duration from on info in methods and results; # of samples estimated from methods	yes	0.2	8	no insecticide	na
315	9	Echegaray2009	Echegaray, F. J.	2009	Masters Thesis, Royal Roads University	na	Environmental effects of insecticides on nontarget predator and parasitoid insects	public	not specified	no	Canada	North America	field	study	no	na	no	canola	other	IMI	IMI	5.68	na	unclear	not specified	na	na	field near the town of Vauxhall	Alberta	2	2002	Echegaray2009-2-2002	Table 13	not specified	752	weighted average; 2 reps were 22X24 and one was 50X24m	yes	yes	randomized block	2002-05-27	2002-05-27	2002-09-18	114	duration from on info in methods and results; # of samples estimated from methods	yes	0.2	8	no insecticide	na
316	9	Echegaray2009	Echegaray, F. J.	2009	Masters Thesis, Royal Roads University	na	Environmental effects of insecticides on nontarget predator and parasitoid insects	public	not specified	no	Canada	North America	field	study	no	na	no	canola	other	IMI	IMI	5.68	na	unclear	not specified	na	na	field near the town of Vauxhall	Alberta	2	2002	Echegaray2009-2-2002	Table 13	not specified	752	weighted average; 2 reps were 22X24 and one was 50X24m	yes	yes	randomized block	2002-05-27	2002-05-27	2002-09-18	114	duration from on info in methods and results; # of samples estimated from methods	yes	0.2	8	no insecticide	na
317	9	Echegaray2009	Echegaray, F. J.	2009	Masters Thesis, Royal Roads University	na	Environmental effects of insecticides on nontarget predator and parasitoid insects	public	not specified	no	Canada	North America	field	study	no	na	no	canola	other	IMI	IMI	5.68	na	unclear	not specified	na	na	field near the town of Vauxhall	Alberta	2	2002	Echegaray2009-2-2002	Table 13	not specified	752	weighted average; 2 reps were 22X24 and one was 50X24m	yes	yes	randomized block	2002-05-27	2002-05-27	2002-09-18	114	duration from on info in methods and results; # of samples estimated from methods	yes	0.2	8	no insecticide	na
318	9	Echegaray2009	Echegaray, F. J.	2009	Masters Thesis, Royal Roads University	na	Environmental effects of insecticides on nontarget predator and parasitoid insects	public	not specified	no	Canada	North America	field	study	no	na	no	canola	other	IMI	IMI	5.68	na	unclear	not specified	na	na	field near the town of Vauxhall	Alberta	2	2002	Echegaray2009-2-2002	Table 13	not specified	752	weighted average; 2 reps were 22X24 and one was 50X24m	yes	yes	randomized block	2002-05-27	2002-05-27	2002-09-18	114	duration from on info in methods and results; # of samples estimated from methods	yes	0.2	8	no insecticide	na
326	10	AlDeeb2003	Al-Deeb, M. A. and G. E. Wilde	2003	Environmental Entomology	32(5): 1164-1170	Effect of Bt corn expressing the Cry3Bb1 toxin for corn rootworm control on aboveground nontarget arthropods	public	not specified	yes	USA	North America	field	study	no	na	no	maize	maize	IMI	IMI	1.2	na	MON 863	yes	yes	na	Sublette	KS	1	2000	AlDeeb2003-1-2000	Table 1	76.2 cm row spacing	23	na	no	yes	randomized block	2000-05-25	na	na	24.5	duration estimated - "visual inspections were made over a 3-4 wk period Û starting at the beginning of the silking stage"	no	0	2	no insecticide	na
327	10	AlDeeb2003	Al-Deeb, M. A. and G. E. Wilde	2003	Environmental Entomology	32(5): 1164-1170	Effect of Bt corn expressing the Cry3Bb1 toxin for corn rootworm control on aboveground nontarget arthropods	public	not specified	yes	USA	North America	field	study	no	na	no	maize	maize	IMI	IMI	1.2	na	MON 863	yes	yes	na	Sublette	KS	1	2000	AlDeeb2003-1-2000	Table 1	76.2 cm row spacing	23	na	no	yes	randomized block	2000-05-25	na	na	24.5	duration estimated - "visual inspections were made over a 3-4 wk period Û starting at the beginning of the silking stage"	no	0	2	no insecticide	na
328	10	AlDeeb2003	Al-Deeb, M. A. and G. E. Wilde	2003	Environmental Entomology	32(5): 1164-1170	Effect of Bt corn expressing the Cry3Bb1 toxin for corn rootworm control on aboveground nontarget arthropods	public	not specified	yes	USA	North America	field	study	no	na	no	maize	maize	IMI	IMI	1.2	na	MON 863	yes	yes	na	Sublette	KS	1	2000	AlDeeb2003-1-2000	Table 3	76.2 cm row spacing	23	na	no	yes	randomized block	2000-05-25	na	na	16.5	duration estimated - there were 3 samples and they each lasted 4-7 days	no	0	3	no insecticide	na
329	10	AlDeeb2003	Al-Deeb, M. A. and G. E. Wilde	2003	Environmental Entomology	32(5): 1164-1170	Effect of Bt corn expressing the Cry3Bb1 toxin for corn rootworm control on aboveground nontarget arthropods	public	not specified	yes	USA	North America	field	study	no	na	no	maize	maize	IMI	IMI	1.2	na	MON 863	yes	yes	na	Sublette	KS	1	2000	AlDeeb2003-1-2000	Table 3	76.2 cm row spacing	23	na	no	yes	randomized block	2000-05-25	na	na	16.5	duration estimated - there were 3 samples and they each lasted 4-7 days	no	0	3	no insecticide	na
330	10	AlDeeb2003	Al-Deeb, M. A. and G. E. Wilde	2003	Environmental Entomology	32(5): 1164-1170	Effect of Bt corn expressing the Cry3Bb1 toxin for corn rootworm control on aboveground nontarget arthropods	public	not specified	yes	USA	North America	field	study	no	na	no	maize	maize	IMI	IMI	1.2	na	MON 863	yes	yes	na	Sublette	KS	1	2000	AlDeeb2003-1-2000	Table 3	76.2 cm row spacing	23	na	no	yes	randomized block	2000-05-25	na	na	16.5	duration estimated - there were 3 samples and they each lasted 4-7 days	no	0	3	no insecticide	na
331	10	AlDeeb2003	Al-Deeb, M. A. and G. E. Wilde	2003	Environmental Entomology	32(5): 1164-1170	Effect of Bt corn expressing the Cry3Bb1 toxin for corn rootworm control on aboveground nontarget arthropods	public	not specified	yes	USA	North America	field	study	no	na	no	maize	maize	IMI	IMI	1.2	na	MON 863	yes	yes	na	Sublette	KS	1	2000	AlDeeb2003-1-2000	Table 3	76.2 cm row spacing	23	na	no	yes	randomized block	2000-05-25	na	na	16.5	duration estimated - there were 3 samples and they each lasted 4-7 days	no	0	3	no insecticide	na
332	10	AlDeeb2003	Al-Deeb, M. A. and G. E. Wilde	2003	Environmental Entomology	32(5): 1164-1170	Effect of Bt corn expressing the Cry3Bb1 toxin for corn rootworm control on aboveground nontarget arthropods	public	not specified	yes	USA	North America	field	study	no	na	no	maize	maize	IMI	IMI	1.2	na	MON 863	yes	yes	na	Sublette	KS	1	2000	AlDeeb2003-1-2000	Table 3	76.2 cm row spacing	23	na	no	yes	randomized block	2000-05-25	na	na	16.5	duration estimated - there were 3 samples and they each lasted 4-7 days	no	0	3	no insecticide	na
351	10	AlDeeb2003	Al-Deeb, M. A. and G. E. Wilde	2003	Environmental Entomology	32(5): 1164-1170	Effect of Bt corn expressing the Cry3Bb1 toxin for corn rootworm control on aboveground nontarget arthropods	public	not specified	yes	USA	North America	field	study	no	na	no	maize	maize	IMI	IMI	na	1.34	Isoline to MON 863	no	na	na	Scandia	KS	2	2001	AlDeeb2003-2-2001	Table 4	76.2 cm row spacing	28	na	no	yes	randomized block	2001-05-12	na	na	27.5	duration estimated - there were 5 samples and they each lasted 4-7 days	no	0	5	no insecticide	na
352	10	AlDeeb2003	Al-Deeb, M. A. and G. E. Wilde	2003	Environmental Entomology	32(5): 1164-1170	Effect of Bt corn expressing the Cry3Bb1 toxin for corn rootworm control on aboveground nontarget arthropods	public	not specified	yes	USA	North America	field	study	no	na	no	maize	maize	IMI	IMI	na	1.34	Isoline to MON 863	no	na	na	Scandia	KS	2	2001	AlDeeb2003-2-2001	Table 4	76.2 cm row spacing	28	na	no	yes	randomized block	2001-05-12	na	na	27.5	duration estimated - there were 5 samples and they each lasted 4-7 days	no	0	5	no insecticide	na
353	10	AlDeeb2003	Al-Deeb, M. A. and G. E. Wilde	2003	Environmental Entomology	32(5): 1164-1170	Effect of Bt corn expressing the Cry3Bb1 toxin for corn rootworm control on aboveground nontarget arthropods	public	not specified	yes	USA	North America	field	study	no	na	no	maize	maize	IMI	IMI	na	1.34	Isoline to MON 863	no	na	na	Scandia	KS	2	2001	AlDeeb2003-2-2001	Table 4	76.2 cm row spacing	28	na	no	yes	randomized block	2001-05-12	na	na	27.5	duration estimated - there were 5 samples and they each lasted 4-7 days	no	0	5	no insecticide	na
354	10	AlDeeb2003	Al-Deeb, M. A. and G. E. Wilde	2003	Environmental Entomology	32(5): 1164-1170	Effect of Bt corn expressing the Cry3Bb1 toxin for corn rootworm control on aboveground nontarget arthropods	public	not specified	yes	USA	North America	field	study	no	na	no	maize	maize	IMI	IMI	na	1.34	Isoline to MON 863	no	na	na	Scandia	KS	2	2001	AlDeeb2003-2-2001	Table 4	76.2 cm row spacing	28	na	no	yes	randomized block	2001-05-12	na	na	27.5	duration estimated - there were 5 samples and they each lasted 4-7 days	no	0	5	no insecticide	na
359	11	AlDeeb2003	Al-Deeb, M. A., G. E. Wilde, J. M. Blair, and T. C. Todd	2003	Environmental Entomology	32(4): 859-865	Effect of Bt corn for corn rootworm control on nontarget soil microarthropods and nematodes	public	not specified	yes	USA	North America	field	study	no	na	no	maize	maize	IMI	IMI	1.2	na	MON 863	yes	yes	na	Sublette	KS	1	2000	AlDeeb2003-1-2000	Table 1	76.2 cm row spacing	23	na	no	yes	randomized block	2000-05-25	na	na	na	sampling occurred at early, mid, and late growth stages but hard to estimate quantitative duration	yes	0.33	3	no insecticide	na
360	11	AlDeeb2003	Al-Deeb, M. A., G. E. Wilde, J. M. Blair, and T. C. Todd	2003	Environmental Entomology	32(4): 859-865	Effect of Bt corn for corn rootworm control on nontarget soil microarthropods and nematodes	public	not specified	yes	USA	North America	field	study	no	na	no	maize	maize	IMI	IMI	1.2	na	MON 863	yes	yes	na	Sublette	KS	1	2000	AlDeeb2003-1-2000	Table 1	76.2 cm row spacing	23	na	no	yes	randomized block	2000-05-25	na	na	na	sampling occurred at early, mid, and late growth stages but hard to estimate quantitative duration	yes	0.33	3	no insecticide	na
361	11	AlDeeb2003	Al-Deeb, M. A., G. E. Wilde, J. M. Blair, and T. C. Todd	2003	Environmental Entomology	32(4): 859-865	Effect of Bt corn for corn rootworm control on nontarget soil microarthropods and nematodes	public	not specified	yes	USA	North America	field	study	no	na	no	maize	maize	IMI	IMI	1.2	na	MON 863	yes	yes	na	Sublette	KS	1	2000	AlDeeb2003-1-2000	Table 1	76.2 cm row spacing	23	na	no	yes	randomized block	2000-05-25	na	na	na	sampling occurred at early, mid, and late growth stages but hard to estimate quantitative duration	yes	0.33	3	no insecticide	na
362	11	AlDeeb2003	Al-Deeb, M. A., G. E. Wilde, J. M. Blair, and T. C. Todd	2003	Environmental Entomology	32(4): 859-865	Effect of Bt corn for corn rootworm control on nontarget soil microarthropods and nematodes	public	not specified	yes	USA	North America	field	study	no	na	no	maize	maize	IMI	IMI	1.2	na	MON 863	yes	yes	na	Sublette	KS	1	2000	AlDeeb2003-1-2000	Table 1	76.2 cm row spacing	23	na	no	yes	randomized block	2000-05-25	na	na	na	sampling occurred at early, mid, and late growth stages but hard to estimate quantitative duration	yes	0.33	3	no insecticide	na
371	12	delaPoza2005Farinos2008	de la Poza, M., X. Pons, G. P. Farinos, C. Lopez, F. Ortego, M. Eizaguirre, P. Castanera, and R. Albajes	2005	Crop Protection	24: 677-684	Impact of farm-scale Bt maize on abundance of predatory arthropods in Spain	public	government	yes	Spain	Europe	field	study	yes	extracted from graph 3 times and took average to get value	yes	maize	maize	IMI	IMI	4.9	na	Dracma	no	na	na	near Lleida	North-east Spain	2	2000	delaPoza2005Farinos2008-2-2000	Figure 1	"standard cultural practices in each area were used"; details on rotation and herbicides in paper; plots not treated w/ soil insecticides for at least 3 years	5500	plots ranged between 0.4 and 0.7 ha but were consistent each year and location	yes	yes	randomized block	2000-05-01	na	na	na	duration is somewhat unclear from the methods; inspections over 5 sample dates; planting date is estimate ("early May")	yes	0.2	5	no insecticide	na
372	12	delaPoza2005Farinos2008	de la Poza, M., X. Pons, G. P. Farinos, C. Lopez, F. Ortego, M. Eizaguirre, P. Castanera, and R. Albajes	2005	Crop Protection	24: 677-684	Impact of farm-scale Bt maize on abundance of predatory arthropods in Spain	public	government	yes	Spain	Europe	field	study	yes	extracted from graph 3 times and took average to get value	yes	maize	maize	IMI	IMI	4.9	na	Dracma	no	na	na	near Lleida	North-east Spain	2	2000	delaPoza2005Farinos2008-2-2000	Figure 1	"standard cultural practices in each area were used"; details on rotation and herbicides in paper; plots not treated w/ soil insecticides for at least 3 years	5500	plots ranged between 0.4 and 0.7 ha but were consistent each year and location	yes	yes	randomized block	2000-05-01	na	na	na	duration is somewhat unclear from the methods; inspections over 5 sample dates; planting date is estimate ("early May")	yes	0.2	5	no insecticide	na
373	12	delaPoza2005Farinos2008	de la Poza, M., X. Pons, G. P. Farinos, C. Lopez, F. Ortego, M. Eizaguirre, P. Castanera, and R. Albajes	2005	Crop Protection	24: 677-684	Impact of farm-scale Bt maize on abundance of predatory arthropods in Spain	public	government	yes	Spain	Europe	field	study	yes	extracted from graph 3 times and took average to get value	yes	maize	maize	IMI	IMI	4.9	na	Dracma	no	na	na	near Lleida	North-east Spain	2	2000	delaPoza2005Farinos2008-2-2000	Figure 1	"standard cultural practices in each area were used"; details on rotation and herbicides in paper; plots not treated w/ soil insecticides for at least 3 years	5500	plots ranged between 0.4 and 0.7 ha but were consistent each year and location	yes	yes	randomized block	2000-05-01	na	na	na	duration is somewhat unclear from the methods; inspections over 5 sample dates; planting date is estimate ("early May")	yes	0.2	5	no insecticide	na
374	12	delaPoza2005Farinos2008	de la Poza, M., X. Pons, G. P. Farinos, C. Lopez, F. Ortego, M. Eizaguirre, P. Castanera, and R. Albajes	2005	Crop Protection	24: 677-684	Impact of farm-scale Bt maize on abundance of predatory arthropods in Spain	public	government	yes	Spain	Europe	field	study	yes	extracted from graph 3 times and took average to get value	yes	maize	maize	IMI	IMI	4.9	na	Dracma	no	na	na	near Lleida	North-east Spain	2	2000	delaPoza2005Farinos2008-2-2000	Figure 1	"standard cultural practices in each area were used"; details on rotation and herbicides in paper; plots not treated w/ soil insecticides for at least 3 years	5500	plots ranged between 0.4 and 0.7 ha but were consistent each year and location	yes	yes	randomized block	2000-05-01	na	na	na	duration is somewhat unclear from the methods; inspections over 5 sample dates; planting date is estimate ("early May")	yes	0.2	5	no insecticide	na
375	12	delaPoza2005Farinos2008	de la Poza, M., X. Pons, G. P. Farinos, C. Lopez, F. Ortego, M. Eizaguirre, P. Castanera, and R. Albajes	2005	Crop Protection	24: 677-684	Impact of farm-scale Bt maize on abundance of predatory arthropods in Spain	public	government	yes	Spain	Europe	field	study	yes	extracted from graph 3 times and took average to get value	yes	maize	maize	IMI	IMI	4.9	na	Dracma	no	na	na	near Lleida	North-east Spain	2	2000	delaPoza2005Farinos2008-2-2000	Figure 1	"standard cultural practices in each area were used"; details on rotation and herbicides in paper; plots not treated w/ soil insecticides for at least 3 years	5500	plots ranged between 0.4 and 0.7 ha but were consistent each year and location	yes	yes	randomized block	2000-05-01	na	na	na	duration is somewhat unclear from the methods; inspections over 5 sample dates; planting date is estimate ("early May")	yes	0.2	5	no insecticide	na
376	12	delaPoza2005Farinos2008	de la Poza, M., X. Pons, G. P. Farinos, C. Lopez, F. Ortego, M. Eizaguirre, P. Castanera, and R. Albajes	2005	Crop Protection	24: 677-684	Impact of farm-scale Bt maize on abundance of predatory arthropods in Spain	public	government	yes	Spain	Europe	field	study	yes	extracted from graph 3 times and took average to get value	yes	maize	maize	IMI	IMI	4.9	na	Dracma	no	na	na	near Lleida	North-east Spain	2	2000	delaPoza2005Farinos2008-2-2000	Figure 1	"standard cultural practices in each area were used"; details on rotation and herbicides in paper; plots not treated w/ soil insecticides for at least 3 years	5500	plots ranged between 0.4 and 0.7 ha but were consistent each year and location	yes	yes	randomized block	2000-05-01	na	na	na	duration is somewhat unclear from the methods; inspections over 5 sample dates; planting date is estimate ("early May")	no	0	8	no insecticide	na
383	12	delaPoza2005Farinos2008	de la Poza, M., X. Pons, G. P. Farinos, C. Lopez, F. Ortego, M. Eizaguirre, P. Castanera, and R. Albajes	2005	Crop Protection	24: 677-684	Impact of farm-scale Bt maize on abundance of predatory arthropods in Spain	public	government	yes	Spain	Europe	field	study	yes	extracted from graph 3 times and took average to get value	yes	maize	maize	IMI	IMI	4.9	na	Dracma	no	na	na	near Lleida	North-east Spain	2	2001	delaPoza2005Farinos2008-2-2001	Figure 1	"standard cultural practices in each area were used"; details on rotation and herbicides in paper; plots not treated w/ soil insecticides for at least 3 years	5500	plots ranged between 0.4 and 0.7 ha but were consistent each year and location	yes	yes	randomized block	2001-05-01	na	na	na	duration is somewhat unclear from the methods; inspections over 5 sample dates; planting date is estimate ("early May")	yes	0.2	5	no insecticide	na
384	12	delaPoza2005Farinos2008	de la Poza, M., X. Pons, G. P. Farinos, C. Lopez, F. Ortego, M. Eizaguirre, P. Castanera, and R. Albajes	2005	Crop Protection	24: 677-684	Impact of farm-scale Bt maize on abundance of predatory arthropods in Spain	public	government	yes	Spain	Europe	field	study	yes	extracted from graph 3 times and took average to get value	yes	maize	maize	IMI	IMI	4.9	na	Dracma	no	na	na	near Lleida	North-east Spain	2	2001	delaPoza2005Farinos2008-2-2001	Figure 1	"standard cultural practices in each area were used"; details on rotation and herbicides in paper; plots not treated w/ soil insecticides for at least 3 years	5500	plots ranged between 0.4 and 0.7 ha but were consistent each year and location	yes	yes	randomized block	2001-05-01	na	na	na	duration is somewhat unclear from the methods; inspections over 5 sample dates; planting date is estimate ("early May")	yes	0.2	5	no insecticide	na
385	12	delaPoza2005Farinos2008	de la Poza, M., X. Pons, G. P. Farinos, C. Lopez, F. Ortego, M. Eizaguirre, P. Castanera, and R. Albajes	2005	Crop Protection	24: 677-684	Impact of farm-scale Bt maize on abundance of predatory arthropods in Spain	public	government	yes	Spain	Europe	field	study	yes	extracted from graph 3 times and took average to get value	yes	maize	maize	IMI	IMI	4.9	na	Dracma	no	na	na	near Lleida	North-east Spain	2	2001	delaPoza2005Farinos2008-2-2001	Figure 1	"standard cultural practices in each area were used"; details on rotation and herbicides in paper; plots not treated w/ soil insecticides for at least 3 years	5500	plots ranged between 0.4 and 0.7 ha but were consistent each year and location	yes	yes	randomized block	2001-05-01	na	na	na	duration is somewhat unclear from the methods; inspections over 5 sample dates; planting date is estimate ("early May")	yes	0.2	5	no insecticide	na
386	12	delaPoza2005Farinos2008	de la Poza, M., X. Pons, G. P. Farinos, C. Lopez, F. Ortego, M. Eizaguirre, P. Castanera, and R. Albajes	2005	Crop Protection	24: 677-684	Impact of farm-scale Bt maize on abundance of predatory arthropods in Spain	public	government	yes	Spain	Europe	field	study	yes	extracted from graph 3 times and took average to get value	yes	maize	maize	IMI	IMI	4.9	na	Dracma	no	na	na	near Lleida	North-east Spain	2	2001	delaPoza2005Farinos2008-2-2001	Figure 1	"standard cultural practices in each area were used"; details on rotation and herbicides in paper; plots not treated w/ soil insecticides for at least 3 years	5500	plots ranged between 0.4 and 0.7 ha but were consistent each year and location	yes	yes	randomized block	2001-05-01	na	na	na	duration is somewhat unclear from the methods; inspections over 5 sample dates; planting date is estimate ("early May")	yes	0.2	5	no insecticide	na
387	12	delaPoza2005Farinos2008	de la Poza, M., X. Pons, G. P. Farinos, C. Lopez, F. Ortego, M. Eizaguirre, P. Castanera, and R. Albajes	2005	Crop Protection	24: 677-684	Impact of farm-scale Bt maize on abundance of predatory arthropods in Spain	public	government	yes	Spain	Europe	field	study	yes	extracted from graph 3 times and took average to get value	yes	maize	maize	IMI	IMI	4.9	na	Dracma	no	na	na	near Lleida	North-east Spain	2	2001	delaPoza2005Farinos2008-2-2001	Figure 1	"standard cultural practices in each area were used"; details on rotation and herbicides in paper; plots not treated w/ soil insecticides for at least 3 years	5500	plots ranged between 0.4 and 0.7 ha but were consistent each year and location	yes	yes	randomized block	2001-05-01	na	na	na	duration is somewhat unclear from the methods; inspections over 5 sample dates; planting date is estimate ("early May")	yes	0.2	5	no insecticide	na
388	12	delaPoza2005Farinos2008	de la Poza, M., X. Pons, G. P. Farinos, C. Lopez, F. Ortego, M. Eizaguirre, P. Castanera, and R. Albajes	2005	Crop Protection	24: 677-684	Impact of farm-scale Bt maize on abundance of predatory arthropods in Spain	public	government	yes	Spain	Europe	field	study	yes	extracted from graph 3 times and took average to get value	yes	maize	maize	IMI	IMI	4.9	na	Dracma	no	na	na	near Lleida	North-east Spain	2	2001	delaPoza2005Farinos2008-2-2001	Figure 1	"standard cultural practices in each area were used"; details on rotation and herbicides in paper; plots not treated w/ soil insecticides for at least 3 years	5500	plots ranged between 0.4 and 0.7 ha but were consistent each year and location	yes	yes	randomized block	2001-05-01	na	na	na	duration is somewhat unclear from the methods; inspections over 5 sample dates; planting date is estimate ("early May")	no	0	8	no insecticide	na
395	12	delaPoza2005Farinos2008	de la Poza, M., X. Pons, G. P. Farinos, C. Lopez, F. Ortego, M. Eizaguirre, P. Castanera, and R. Albajes	2005	Crop Protection	24: 677-684	Impact of farm-scale Bt maize on abundance of predatory arthropods in Spain	public	government	yes	Spain	Europe	field	study	yes	extracted from graph 3 times and took average to get value	yes	maize	maize	IMI	IMI	4.9	na	Dracma	no	na	na	near Madrid	Madrid	1	2000	delaPoza2005Farinos2008-1-2000	Figure 1	"standard cultural practices in each area were used"; details on rotation and herbicides in paper; plots not treated w/ soil insecticides for at least 3 years	5500	plots ranged between 0.4 and 0.7 ha but were consistent each year and location	yes	yes	randomized block	2000-04-30	na	na	na	duration is somewhat unclear from the methods; inspections over 8 sample dates; planting date is estimate ("late April")	no	0	8	no insecticide	na
396	12	delaPoza2005Farinos2008	de la Poza, M., X. Pons, G. P. Farinos, C. Lopez, F. Ortego, M. Eizaguirre, P. Castanera, and R. Albajes	2005	Crop Protection	24: 677-684	Impact of farm-scale Bt maize on abundance of predatory arthropods in Spain	public	government	yes	Spain	Europe	field	study	yes	extracted from graph 3 times and took average to get value	yes	maize	maize	IMI	IMI	4.9	na	Dracma	no	na	na	near Madrid	Madrid	1	2000	delaPoza2005Farinos2008-1-2000	Figure 1	"standard cultural practices in each area were used"; details on rotation and herbicides in paper; plots not treated w/ soil insecticides for at least 3 years	5500	plots ranged between 0.4 and 0.7 ha but were consistent each year and location	yes	yes	randomized block	2000-04-30	na	na	na	duration is somewhat unclear from the methods; inspections over 8 sample dates; planting date is estimate ("late April")	no	0	8	no insecticide	na
397	12	delaPoza2005Farinos2008	de la Poza, M., X. Pons, G. P. Farinos, C. Lopez, F. Ortego, M. Eizaguirre, P. Castanera, and R. Albajes	2005	Crop Protection	24: 677-684	Impact of farm-scale Bt maize on abundance of predatory arthropods in Spain	public	government	yes	Spain	Europe	field	study	yes	extracted from graph 3 times and took average to get value	yes	maize	maize	IMI	IMI	4.9	na	Dracma	no	na	na	near Madrid	Madrid	1	2000	delaPoza2005Farinos2008-1-2000	Figure 1	"standard cultural practices in each area were used"; details on rotation and herbicides in paper; plots not treated w/ soil insecticides for at least 3 years	5500	plots ranged between 0.4 and 0.7 ha but were consistent each year and location	yes	yes	randomized block	2000-04-30	na	na	na	duration is somewhat unclear from the methods; inspections over 8 sample dates; planting date is estimate ("late April")	no	0	8	no insecticide	na
398	12	delaPoza2005Farinos2008	de la Poza, M., X. Pons, G. P. Farinos, C. Lopez, F. Ortego, M. Eizaguirre, P. Castanera, and R. Albajes	2005	Crop Protection	24: 677-684	Impact of farm-scale Bt maize on abundance of predatory arthropods in Spain	public	government	yes	Spain	Europe	field	study	yes	extracted from graph 3 times and took average to get value	yes	maize	maize	IMI	IMI	4.9	na	Dracma	no	na	na	near Madrid	Madrid	1	2000	delaPoza2005Farinos2008-1-2000	Figure 1	"standard cultural practices in each area were used"; details on rotation and herbicides in paper; plots not treated w/ soil insecticides for at least 3 years	5500	plots ranged between 0.4 and 0.7 ha but were consistent each year and location	yes	yes	randomized block	2000-04-30	na	na	na	duration is somewhat unclear from the methods; inspections over 8 sample dates; planting date is estimate ("late April")	no	0	8	no insecticide	na
399	12	delaPoza2005Farinos2008	de la Poza, M., X. Pons, G. P. Farinos, C. Lopez, F. Ortego, M. Eizaguirre, P. Castanera, and R. Albajes	2005	Crop Protection	24: 677-684	Impact of farm-scale Bt maize on abundance of predatory arthropods in Spain	public	government	yes	Spain	Europe	field	study	yes	extracted from graph 3 times and took average to get value	yes	maize	maize	IMI	IMI	4.9	na	Dracma	no	na	na	near Madrid	Madrid	1	2000	delaPoza2005Farinos2008-1-2000	Figure 1	"standard cultural practices in each area were used"; details on rotation and herbicides in paper; plots not treated w/ soil insecticides for at least 3 years	5500	plots ranged between 0.4 and 0.7 ha but were consistent each year and location	yes	yes	randomized block	2000-04-30	na	na	na	duration is somewhat unclear from the methods; inspections over 8 sample dates; planting date is estimate ("late April")	no	0	8	no insecticide	na
400	12	delaPoza2005Farinos2008	de la Poza, M., X. Pons, G. P. Farinos, C. Lopez, F. Ortego, M. Eizaguirre, P. Castanera, and R. Albajes	2005	Crop Protection	24: 677-684	Impact of farm-scale Bt maize on abundance of predatory arthropods in Spain	public	government	yes	Spain	Europe	field	study	yes	extracted from graph 3 times and took average to get value	yes	maize	maize	IMI	IMI	4.9	na	Dracma	no	na	na	near Madrid	Madrid	1	2000	delaPoza2005Farinos2008-1-2000	Figure 1	"standard cultural practices in each area were used"; details on rotation and herbicides in paper; plots not treated w/ soil insecticides for at least 3 years	5500	plots ranged between 0.4 and 0.7 ha but were consistent each year and location	yes	yes	randomized block	2000-04-30	na	na	na	duration is somewhat unclear from the methods; inspections over 8 sample dates; planting date is estimate ("late April")	no	0	8	no insecticide	na
407	12	delaPoza2005Farinos2008	de la Poza, M., X. Pons, G. P. Farinos, C. Lopez, F. Ortego, M. Eizaguirre, P. Castanera, and R. Albajes	2005	Crop Protection	24: 677-684	Impact of farm-scale Bt maize on abundance of predatory arthropods in Spain	public	government	yes	Spain	Europe	field	study	yes	extracted from graph 3 times and took average to get value	yes	maize	maize	IMI	IMI	4.9	na	Dracma	no	na	na	near Madrid	Madrid	1	2001	delaPoza2005Farinos2008-1-2001	Figure 1	"standard cultural practices in each area were used"; details on rotation and herbicides in paper; plots not treated w/ soil insecticides for at least 3 years	5500	plots ranged between 0.4 and 0.7 ha but were consistent each year and location	yes	yes	randomized block	2001-04-30	na	na	na	duration is somewhat unclear from the methods; inspections over 8 sample dates; planting date is estimate ("late April")	no	0	8	no insecticide	na
408	12	delaPoza2005Farinos2008	de la Poza, M., X. Pons, G. P. Farinos, C. Lopez, F. Ortego, M. Eizaguirre, P. Castanera, and R. Albajes	2005	Crop Protection	24: 677-684	Impact of farm-scale Bt maize on abundance of predatory arthropods in Spain	public	government	yes	Spain	Europe	field	study	yes	extracted from graph 3 times and took average to get value	yes	maize	maize	IMI	IMI	4.9	na	Dracma	no	na	na	near Madrid	Madrid	1	2001	delaPoza2005Farinos2008-1-2001	Figure 1	"standard cultural practices in each area were used"; details on rotation and herbicides in paper; plots not treated w/ soil insecticides for at least 3 years	5500	plots ranged between 0.4 and 0.7 ha but were consistent each year and location	yes	yes	randomized block	2001-04-30	na	na	na	duration is somewhat unclear from the methods; inspections over 8 sample dates; planting date is estimate ("late April")	no	0	8	no insecticide	na
409	12	delaPoza2005Farinos2008	de la Poza, M., X. Pons, G. P. Farinos, C. Lopez, F. Ortego, M. Eizaguirre, P. Castanera, and R. Albajes	2005	Crop Protection	24: 677-684	Impact of farm-scale Bt maize on abundance of predatory arthropods in Spain	public	government	yes	Spain	Europe	field	study	yes	extracted from graph 3 times and took average to get value	yes	maize	maize	IMI	IMI	4.9	na	Dracma	no	na	na	near Madrid	Madrid	1	2001	delaPoza2005Farinos2008-1-2001	Figure 1	"standard cultural practices in each area were used"; details on rotation and herbicides in paper; plots not treated w/ soil insecticides for at least 3 years	5500	plots ranged between 0.4 and 0.7 ha but were consistent each year and location	yes	yes	randomized block	2001-04-30	na	na	na	duration is somewhat unclear from the methods; inspections over 8 sample dates; planting date is estimate ("late April")	no	0	8	no insecticide	na
410	12	delaPoza2005Farinos2008	de la Poza, M., X. Pons, G. P. Farinos, C. Lopez, F. Ortego, M. Eizaguirre, P. Castanera, and R. Albajes	2005	Crop Protection	24: 677-684	Impact of farm-scale Bt maize on abundance of predatory arthropods in Spain	public	government	yes	Spain	Europe	field	study	yes	extracted from graph 3 times and took average to get value	yes	maize	maize	IMI	IMI	4.9	na	Dracma	no	na	na	near Madrid	Madrid	1	2001	delaPoza2005Farinos2008-1-2001	Figure 1	"standard cultural practices in each area were used"; details on rotation and herbicides in paper; plots not treated w/ soil insecticides for at least 3 years	5500	plots ranged between 0.4 and 0.7 ha but were consistent each year and location	yes	yes	randomized block	2001-04-30	na	na	na	duration is somewhat unclear from the methods; inspections over 8 sample dates; planting date is estimate ("late April")	no	0	8	no insecticide	na
411	12	delaPoza2005Farinos2008	de la Poza, M., X. Pons, G. P. Farinos, C. Lopez, F. Ortego, M. Eizaguirre, P. Castanera, and R. Albajes	2005	Crop Protection	24: 677-684	Impact of farm-scale Bt maize on abundance of predatory arthropods in Spain	public	government	yes	Spain	Europe	field	study	yes	extracted from graph 3 times and took average to get value	yes	maize	maize	IMI	IMI	4.9	na	Dracma	no	na	na	near Madrid	Madrid	1	2001	delaPoza2005Farinos2008-1-2001	Figure 1	"standard cultural practices in each area were used"; details on rotation and herbicides in paper; plots not treated w/ soil insecticides for at least 3 years	5500	plots ranged between 0.4 and 0.7 ha but were consistent each year and location	yes	yes	randomized block	2001-04-30	na	na	na	duration is somewhat unclear from the methods; inspections over 8 sample dates; planting date is estimate ("late April")	no	0	8	no insecticide	na
412	12	delaPoza2005Farinos2008	de la Poza, M., X. Pons, G. P. Farinos, C. Lopez, F. Ortego, M. Eizaguirre, P. Castanera, and R. Albajes	2005	Crop Protection	24: 677-684	Impact of farm-scale Bt maize on abundance of predatory arthropods in Spain	public	government	yes	Spain	Europe	field	study	yes	extracted from graph 3 times and took average to get value	yes	maize	maize	IMI	IMI	4.9	na	Dracma	no	na	na	near Madrid	Madrid	1	2001	delaPoza2005Farinos2008-1-2001	Figure 1	"standard cultural practices in each area were used"; details on rotation and herbicides in paper; plots not treated w/ soil insecticides for at least 3 years	5500	plots ranged between 0.4 and 0.7 ha but were consistent each year and location	yes	yes	randomized block	2001-04-30	na	na	na	duration is somewhat unclear from the methods; inspections over 8 sample dates; planting date is estimate ("late April")	no	0	8	no insecticide	na
419	12	delaPoza2005Farinos2008	de la Poza, M., X. Pons, G. P. Farinos, C. Lopez, F. Ortego, M. Eizaguirre, P. Castanera, and R. Albajes	2005	Crop Protection	24: 677-684	Impact of farm-scale Bt maize on abundance of predatory arthropods in Spain	public	government	yes	Spain	Europe	field	study	yes	extracted from graph 3 times and took average to get value	yes	maize	maize	IMI	IMI	4.9	na	Dracma	no	na	na	near Madrid	Madrid	1	2002	delaPoza2005Farinos2008-1-2002	Figure 1	"standard cultural practices in each area were used"; details on rotation and herbicides in paper; plots not treated w/ soil insecticides for at least 3 years	5500	plots ranged between 0.4 and 0.7 ha but were consistent each year and location	yes	yes	randomized block	2002-04-30	na	na	na	duration is somewhat unclear from the methods; inspections over 8 sample dates; planting date is estimate ("late April")	no	0	8	no insecticide	na
420	12	delaPoza2005Farinos2008	de la Poza, M., X. Pons, G. P. Farinos, C. Lopez, F. Ortego, M. Eizaguirre, P. Castanera, and R. Albajes	2005	Crop Protection	24: 677-684	Impact of farm-scale Bt maize on abundance of predatory arthropods in Spain	public	government	yes	Spain	Europe	field	study	yes	extracted from graph 3 times and took average to get value	yes	maize	maize	IMI	IMI	4.9	na	Dracma	no	na	na	near Madrid	Madrid	1	2002	delaPoza2005Farinos2008-1-2002	Figure 1	"standard cultural practices in each area were used"; details on rotation and herbicides in paper; plots not treated w/ soil insecticides for at least 3 years	5500	plots ranged between 0.4 and 0.7 ha but were consistent each year and location	yes	yes	randomized block	2002-04-30	na	na	na	duration is somewhat unclear from the methods; inspections over 8 sample dates; planting date is estimate ("late April")	no	0	8	no insecticide	na
421	12	delaPoza2005Farinos2008	de la Poza, M., X. Pons, G. P. Farinos, C. Lopez, F. Ortego, M. Eizaguirre, P. Castanera, and R. Albajes	2005	Crop Protection	24: 677-684	Impact of farm-scale Bt maize on abundance of predatory arthropods in Spain	public	government	yes	Spain	Europe	field	study	yes	extracted from graph 3 times and took average to get value	yes	maize	maize	IMI	IMI	4.9	na	Dracma	no	na	na	near Madrid	Madrid	1	2002	delaPoza2005Farinos2008-1-2002	Figure 1	"standard cultural practices in each area were used"; details on rotation and herbicides in paper; plots not treated w/ soil insecticides for at least 3 years	5500	plots ranged between 0.4 and 0.7 ha but were consistent each year and location	yes	yes	randomized block	2002-04-30	na	na	na	duration is somewhat unclear from the methods; inspections over 8 sample dates; planting date is estimate ("late April")	no	0	8	no insecticide	na
422	12	delaPoza2005Farinos2008	de la Poza, M., X. Pons, G. P. Farinos, C. Lopez, F. Ortego, M. Eizaguirre, P. Castanera, and R. Albajes	2005	Crop Protection	24: 677-684	Impact of farm-scale Bt maize on abundance of predatory arthropods in Spain	public	government	yes	Spain	Europe	field	study	yes	extracted from graph 3 times and took average to get value	yes	maize	maize	IMI	IMI	4.9	na	Dracma	no	na	na	near Madrid	Madrid	1	2002	delaPoza2005Farinos2008-1-2002	Figure 1	"standard cultural practices in each area were used"; details on rotation and herbicides in paper; plots not treated w/ soil insecticides for at least 3 years	5500	plots ranged between 0.4 and 0.7 ha but were consistent each year and location	yes	yes	randomized block	2002-04-30	na	na	na	duration is somewhat unclear from the methods; inspections over 8 sample dates; planting date is estimate ("late April")	no	0	8	no insecticide	na
423	12	delaPoza2005Farinos2008	de la Poza, M., X. Pons, G. P. Farinos, C. Lopez, F. Ortego, M. Eizaguirre, P. Castanera, and R. Albajes	2005	Crop Protection	24: 677-684	Impact of farm-scale Bt maize on abundance of predatory arthropods in Spain	public	government	yes	Spain	Europe	field	study	yes	extracted from graph 3 times and took average to get value	yes	maize	maize	IMI	IMI	4.9	na	Dracma	no	na	na	near Madrid	Madrid	1	2002	delaPoza2005Farinos2008-1-2002	Figure 1	"standard cultural practices in each area were used"; details on rotation and herbicides in paper; plots not treated w/ soil insecticides for at least 3 years	5500	plots ranged between 0.4 and 0.7 ha but were consistent each year and location	yes	yes	randomized block	2002-04-30	na	na	na	duration is somewhat unclear from the methods; inspections over 8 sample dates; planting date is estimate ("late April")	no	0	8	no insecticide	na
424	12	delaPoza2005Farinos2008	de la Poza, M., X. Pons, G. P. Farinos, C. Lopez, F. Ortego, M. Eizaguirre, P. Castanera, and R. Albajes	2005	Crop Protection	24: 677-684	Impact of farm-scale Bt maize on abundance of predatory arthropods in Spain	public	government	yes	Spain	Europe	field	study	yes	extracted from graph 3 times and took average to get value	yes	maize	maize	IMI	IMI	4.9	na	Dracma	no	na	na	near Madrid	Madrid	1	2002	delaPoza2005Farinos2008-1-2002	Figure 1	"standard cultural practices in each area were used"; details on rotation and herbicides in paper; plots not treated w/ soil insecticides for at least 3 years	5500	plots ranged between 0.4 and 0.7 ha but were consistent each year and location	yes	yes	randomized block	2002-04-30	na	na	na	duration is somewhat unclear from the methods; inspections over 8 sample dates; planting date is estimate ("late April")	no	0	8	no insecticide	na
431	13	Charlet2007	Charlet, L. D., R. M. Aiken, R. F. Meyer, and A. Gebre-Amlak	2007	Journal of Economic Entomology	100(4): 1248-1257	Impact of combining planting date and chemical control to reduce larval densities of stem-infesting pests of sunflower in the Central Plains	public	government/crop industry	yes	USA	North America	field	study	no	na	no	sunflower	other	THX	THX/CLO	na	0.2	Triumph oilseed hybrid 652	not specified	na	na	Central Great Plains Research Station, Akron	CO	1	2002	Charlet2007-1-2002	Table 4	~54000 plants/ha	24	na	no	yes	split plot	2002-05-21	na	na		stems were collected and weevil larvae removed once after plant senescence; reflect full season infestation	no	0	1	no insecticide	na
434	13	Charlet2007	Charlet, L. D., R. M. Aiken, R. F. Meyer, and A. Gebre-Amlak	2007	Journal of Economic Entomology	100(4): 1248-1257	Impact of combining planting date and chemical control to reduce larval densities of stem-infesting pests of sunflower in the Central Plains	public	government/crop industry	yes	USA	North America	field	study	no	na	no	sunflower	other	THX	THX/CLO	na	0.2	Triumph oilseed hybrid 652	not specified	na	na	Central Great Plains Research Station, Akron	CO	1	2002	Charlet2007-1-2002	Table 4	~54000 plants/ha	24	na	no	yes	split plot	2002-06-06	na	na		stems were collected and weevil larvae removed once after plant senescence; reflect full season infestation	no	0	1	no insecticide	na
437	13	Charlet2007	Charlet, L. D., R. M. Aiken, R. F. Meyer, and A. Gebre-Amlak	2007	Journal of Economic Entomology	100(4): 1248-1257	Impact of combining planting date and chemical control to reduce larval densities of stem-infesting pests of sunflower in the Central Plains	public	government/crop industry	yes	USA	North America	field	study	no	na	no	sunflower	other	THX	THX/CLO	na	0.2	Triumph oilseed hybrid 652	not specified	na	na	Central Great Plains Research Station, Akron	CO	1	2002	Charlet2007-1-2002	Table 4	~54000 plants/ha	24	na	no	yes	split plot	2002-06-18	na	na		stems were collected and weevil larvae removed once after plant senescence; reflect full season infestation	no	0	1	no insecticide	na
440	13	Charlet2007	Charlet, L. D., R. M. Aiken, R. F. Meyer, and A. Gebre-Amlak	2007	Journal of Economic Entomology	100(4): 1248-1257	Impact of combining planting date and chemical control to reduce larval densities of stem-infesting pests of sunflower in the Central Plains	public	government/crop industry	yes	USA	North America	field	study	no	na	no	sunflower	other	THX	THX/CLO	na	1	Triumph oilseed hybrid 652	not specified	na	na	Central Great Plains Research Station, Akron	CO	1	2003	Charlet2007-1-2003	Table 4	~54000 plants/ha	24	na	no	yes	split plot	2003-05-21	na	na		stems were collected and weevil larvae removed once after plant senescence; reflect full season infestation	no	0	1	no insecticide	na
443	13	Charlet2007	Charlet, L. D., R. M. Aiken, R. F. Meyer, and A. Gebre-Amlak	2007	Journal of Economic Entomology	100(4): 1248-1257	Impact of combining planting date and chemical control to reduce larval densities of stem-infesting pests of sunflower in the Central Plains	public	government/crop industry	yes	USA	North America	field	study	no	na	no	sunflower	other	THX	THX/CLO	na	1	Triumph oilseed hybrid 652	not specified	na	na	Central Great Plains Research Station, Akron	CO	1	2003	Charlet2007-1-2003	Table 4	~54000 plants/ha	24	na	no	yes	split plot	2003-06-06	na	na		stems were collected and weevil larvae removed once after plant senescence; reflect full season infestation	no	0	1	no insecticide	na
446	13	Charlet2007	Charlet, L. D., R. M. Aiken, R. F. Meyer, and A. Gebre-Amlak	2007	Journal of Economic Entomology	100(4): 1248-1257	Impact of combining planting date and chemical control to reduce larval densities of stem-infesting pests of sunflower in the Central Plains	public	government/crop industry	yes	USA	North America	field	study	no	na	no	sunflower	other	THX	THX/CLO	na	1	Triumph oilseed hybrid 652	not specified	na	na	Central Great Plains Research Station, Akron	CO	1	2003	Charlet2007-1-2003	Table 4	~54000 plants/ha	24	na	no	yes	split plot	2003-06-20	na	na		stems were collected and weevil larvae removed once after plant senescence; reflect full season infestation	no	0	1	no insecticide	na
449	13	Charlet2007	Charlet, L. D., R. M. Aiken, R. F. Meyer, and A. Gebre-Amlak	2007	Journal of Economic Entomology	100(4): 1248-1257	Impact of combining planting date and chemical control to reduce larval densities of stem-infesting pests of sunflower in the Central Plains	public	government/crop industry	yes	USA	North America	field	study	no	na	no	sunflower	other	THX	THX/CLO	na	0.2	Triumph oilseed hybrid 652	not specified	na	na	near Goodland	KS	2	2002	Charlet2007-2-2002	Table 4	~54000 plants/ha	24	na	no	yes	split plot	2002-05-22	na	na		stems were collected and weevil larvae removed once after plant senescence; reflect full season infestation	no	0	1	no insecticide	na
452	13	Charlet2007	Charlet, L. D., R. M. Aiken, R. F. Meyer, and A. Gebre-Amlak	2007	Journal of Economic Entomology	100(4): 1248-1257	Impact of combining planting date and chemical control to reduce larval densities of stem-infesting pests of sunflower in the Central Plains	public	government/crop industry	yes	USA	North America	field	study	no	na	no	sunflower	other	THX	THX/CLO	na	0.2	Triumph oilseed hybrid 652	not specified	na	na	near Goodland	KS	2	2002	Charlet2007-2-2002	Table 4	~54000 plants/ha	24	na	no	yes	split plot	2002-05-31	na	na		stems were collected and weevil larvae removed once after plant senescence; reflect full season infestation	no	0	1	no insecticide	na
455	13	Charlet2007	Charlet, L. D., R. M. Aiken, R. F. Meyer, and A. Gebre-Amlak	2007	Journal of Economic Entomology	100(4): 1248-1257	Impact of combining planting date and chemical control to reduce larval densities of stem-infesting pests of sunflower in the Central Plains	public	government/crop industry	yes	USA	North America	field	study	no	na	no	sunflower	other	THX	THX/CLO	na	0.2	Triumph oilseed hybrid 652	not specified	na	na	near Goodland	KS	2	2002	Charlet2007-2-2002	Table 4	~54000 plants/ha	24	na	no	yes	split plot	2002-06-10	na	na		stems were collected and weevil larvae removed once after plant senescence; reflect full season infestation	no	0	1	no insecticide	na
458	13	Charlet2007	Charlet, L. D., R. M. Aiken, R. F. Meyer, and A. Gebre-Amlak	2007	Journal of Economic Entomology	100(4): 1248-1257	Impact of combining planting date and chemical control to reduce larval densities of stem-infesting pests of sunflower in the Central Plains	public	government/crop industry	yes	USA	North America	field	study	no	na	no	sunflower	other	THX	THX/CLO	na	1	Triumph oilseed hybrid 652	not specified	na	na	near Goodland	KS	2	2003	Charlet2007-2-2003	Table 4	~54000 plants/ha	24	na	no	yes	split plot	2003-05-19	na	na		stems were collected and weevil larvae removed once after plant senescence; reflect full season infestation	no	0	1	no insecticide	na
461	13	Charlet2007	Charlet, L. D., R. M. Aiken, R. F. Meyer, and A. Gebre-Amlak	2007	Journal of Economic Entomology	100(4): 1248-1257	Impact of combining planting date and chemical control to reduce larval densities of stem-infesting pests of sunflower in the Central Plains	public	government/crop industry	yes	USA	North America	field	study	no	na	no	sunflower	other	THX	THX/CLO	na	1	Triumph oilseed hybrid 652	not specified	na	na	near Goodland	KS	2	2003	Charlet2007-2-2003	Table 4	~54000 plants/ha	24	na	no	yes	split plot	2003-05-29	na	na		stems were collected and weevil larvae removed once after plant senescence; reflect full season infestation	no	0	1	no insecticide	na
464	13	Charlet2007	Charlet, L. D., R. M. Aiken, R. F. Meyer, and A. Gebre-Amlak	2007	Journal of Economic Entomology	100(4): 1248-1257	Impact of combining planting date and chemical control to reduce larval densities of stem-infesting pests of sunflower in the Central Plains	public	government/crop industry	yes	USA	North America	field	study	no	na	no	sunflower	other	THX	THX/CLO	na	1	Triumph oilseed hybrid 652	not specified	na	na	near Goodland	KS	2	2003	Charlet2007-2-2003	Table 4	~54000 plants/ha	24	na	no	yes	split plot	2003-06-09	na	na		stems were collected and weevil larvae removed once after plant senescence; reflect full season infestation	no	0	1	no insecticide	na
467	13	Charlet2007	Charlet, L. D., R. M. Aiken, R. F. Meyer, and A. Gebre-Amlak	2007	Journal of Economic Entomology	100(4): 1248-1257	Impact of combining planting date and chemical control to reduce larval densities of stem-infesting pests of sunflower in the Central Plains	public	government/crop industry	yes	USA	North America	field	study	no	na	no	sunflower	other	THX	THX/CLO	na	0.2	Triumph oilseed hybrid 652	not specified	na	na	NW Research and Extension Center, Colby	KS	3	2002	Charlet2007-3-2002	Table 4	~54000 plants/ha	24	na	no	yes	split plot	2002-05-10	na	na		stems were collected and weevil larvae removed once after plant senescence; reflect full season infestation	no	0	1	no insecticide	na
469	13	Charlet2007	Charlet, L. D., R. M. Aiken, R. F. Meyer, and A. Gebre-Amlak	2007	Journal of Economic Entomology	100(4): 1248-1257	Impact of combining planting date and chemical control to reduce larval densities of stem-infesting pests of sunflower in the Central Plains	public	government/crop industry	yes	USA	North America	field	study	no	na	no	sunflower	other	THX	THX/CLO	na	0.2	Triumph oilseed hybrid 652	not specified	na	na	NW Research and Extension Center, Colby	KS	3	2002	Charlet2007-3-2002	Table 4	~54000 plants/ha	24	na	no	yes	split plot	2002-05-28	na	na		stems were collected and weevil larvae removed once after plant senescence; reflect full season infestation	no	0	1	no insecticide	na
471	13	Charlet2007	Charlet, L. D., R. M. Aiken, R. F. Meyer, and A. Gebre-Amlak	2007	Journal of Economic Entomology	100(4): 1248-1257	Impact of combining planting date and chemical control to reduce larval densities of stem-infesting pests of sunflower in the Central Plains	public	government/crop industry	yes	USA	North America	field	study	no	na	no	sunflower	other	THX	THX/CLO	na	0.2	Triumph oilseed hybrid 652	not specified	na	na	NW Research and Extension Center, Colby	KS	3	2002	Charlet2007-3-2002	Table 4	~54000 plants/ha	24	na	no	yes	split plot	2002-06-06	na	na		stems were collected and weevil larvae removed once after plant senescence; reflect full season infestation	no	0	1	no insecticide	na
473	13	Charlet2007	Charlet, L. D., R. M. Aiken, R. F. Meyer, and A. Gebre-Amlak	2007	Journal of Economic Entomology	100(4): 1248-1257	Impact of combining planting date and chemical control to reduce larval densities of stem-infesting pests of sunflower in the Central Plains	public	government/crop industry	yes	USA	North America	field	study	no	na	no	sunflower	other	THX	THX/CLO	na	1	Triumph oilseed hybrid 652	not specified	na	na	NW Research and Extension Center, Colby	KS	3	2003	Charlet2007-3-2003	Table 4	~54000 plants/ha	24	na	no	yes	split plot	2003-05-13	na	na		stems were collected and weevil larvae removed once after plant senescence; reflect full season infestation	no	0	1	no insecticide	na
475	13	Charlet2007	Charlet, L. D., R. M. Aiken, R. F. Meyer, and A. Gebre-Amlak	2007	Journal of Economic Entomology	100(4): 1248-1257	Impact of combining planting date and chemical control to reduce larval densities of stem-infesting pests of sunflower in the Central Plains	public	government/crop industry	yes	USA	North America	field	study	no	na	no	sunflower	other	THX	THX/CLO	na	1	Triumph oilseed hybrid 652	not specified	na	na	NW Research and Extension Center, Colby	KS	3	2003	Charlet2007-3-2003	Table 4	~54000 plants/ha	24	na	no	yes	split plot	2003-06-02	na	na		stems were collected and weevil larvae removed once after plant senescence; reflect full season infestation	no	0	1	no insecticide	na
477	13	Charlet2007	Charlet, L. D., R. M. Aiken, R. F. Meyer, and A. Gebre-Amlak	2007	Journal of Economic Entomology	100(4): 1248-1257	Impact of combining planting date and chemical control to reduce larval densities of stem-infesting pests of sunflower in the Central Plains	public	government/crop industry	yes	USA	North America	field	study	no	na	no	sunflower	other	THX	THX/CLO	na	1	Triumph oilseed hybrid 652	not specified	na	na	NW Research and Extension Center, Colby	KS	3	2003	Charlet2007-3-2003	Table 4	~54000 plants/ha	24	na	no	yes	split plot	2003-06-24	na	na		stems were collected and weevil larvae removed once after plant senescence; reflect full season infestation	no	0	1	no insecticide	na
480	14	Bhatti2005	Bhatti, M. A., J. Duan, G. P. Head, C. Jiang, M. J. McKee, T. E. Nickson, C. L. Pilcher, and C. D. Pilcher	2005	Environmental Entomology	34(5): 1325-1335	Field evaluation of the impact of corn rootworm (Coleoptera: Chrysomelidae)-protected Bt corn on ground-dwelling invertebrates	private	seed-chemical industry	yes	USA	North America	field	study	no	na	no	maize	maize	IMI	IMI	0.6	na	MON 863	yes	yes	na	Monsanto research farm in Monmouth	IL	1	2000	Bhatti2005-1-2000	Table 2	"agronomic practices were typical of common agricultural practices in the corn growing region"	335	na	no	yes	split plot	na				V6 to R1	yes	0.33	3	no insecticide	na
483	14	Bhatti2005	Bhatti, M. A., J. Duan, G. P. Head, C. Jiang, M. J. McKee, T. E. Nickson, C. L. Pilcher, and C. D. Pilcher	2005	Environmental Entomology	34(5): 1325-1335	Field evaluation of the impact of corn rootworm (Coleoptera: Chrysomelidae)-protected Bt corn on ground-dwelling invertebrates	private	seed-chemical industry	yes	USA	North America	field	study	no	na	no	maize	maize	IMI	IMI	0.6	na	RX670	no	na	na	Monsanto research farm in Monmouth	IL	1	2000	Bhatti2005-1-2000	Table 2	"agronomic practices were typical of common agricultural practices in the corn growing region"	335	na	no	yes	split plot	na				V6 to R1	yes	0.33	3	no insecticide	na
486	14	Bhatti2005	Bhatti, M. A., J. Duan, G. P. Head, C. Jiang, M. J. McKee, T. E. Nickson, C. L. Pilcher, and C. D. Pilcher	2005	Environmental Entomology	34(5): 1325-1335	Field evaluation of the impact of corn rootworm (Coleoptera: Chrysomelidae)-protected Bt corn on ground-dwelling invertebrates	private	seed-chemical industry	yes	USA	North America	field	study	no	na	no	maize	maize	IMI	IMI	0.6	na	MON 863	yes	yes	na	Monsanto research farm in Monmouth	IL	1	2001	Bhatti2005-1-2001	Table 2	"agronomic practices were typical of common agricultural practices in the corn growing region"	335	na	no	yes	split plot	na				V6 to R1	yes	0.33	3	no insecticide	na
489	14	Bhatti2005	Bhatti, M. A., J. Duan, G. P. Head, C. Jiang, M. J. McKee, T. E. Nickson, C. L. Pilcher, and C. D. Pilcher	2005	Environmental Entomology	34(5): 1325-1335	Field evaluation of the impact of corn rootworm (Coleoptera: Chrysomelidae)-protected Bt corn on ground-dwelling invertebrates	private	seed-chemical industry	yes	USA	North America	field	study	no	na	no	maize	maize	IMI	IMI	0.6	na	RX670	no	na	na	Monsanto research farm in Monmouth	IL	1	2001	Bhatti2005-1-2001	Table 2	"agronomic practices were typical of common agricultural practices in the corn growing region"	335	na	no	yes	split plot	na				V6 to R1	yes	0.33	3	no insecticide	na
492	14	Bhatti2005	Bhatti, M. A., J. Duan, G. P. Head, C. Jiang, M. J. McKee, T. E. Nickson, C. L. Pilcher, and C. D. Pilcher	2005	Environmental Entomology	34(5): 1325-1335	Field evaluation of the impact of corn rootworm (Coleoptera: Chrysomelidae)-protected Bt corn on ground-dwelling invertebrates	private	seed-chemical industry	yes	USA	North America	field	study	no	na	no	maize	maize	IMI	IMI	0.6	na	MON 863	yes	yes	na	Monsanto research farm in Monmouth	IL	1	2002	Bhatti2005-1-2002	Table 2	"agronomic practices were typical of common agricultural practices in the corn growing region"	335	na	no	yes	split plot	na				V6 to R1	yes	0.33	3	no insecticide	na
495	14	Bhatti2005	Bhatti, M. A., J. Duan, G. P. Head, C. Jiang, M. J. McKee, T. E. Nickson, C. L. Pilcher, and C. D. Pilcher	2005	Environmental Entomology	34(5): 1325-1335	Field evaluation of the impact of corn rootworm (Coleoptera: Chrysomelidae)-protected Bt corn on ground-dwelling invertebrates	private	seed-chemical industry	yes	USA	North America	field	study	no	na	no	maize	maize	IMI	IMI	0.6	na	RX670	no	na	na	Monsanto research farm in Monmouth	IL	1	2002	Bhatti2005-1-2002	Table 2	"agronomic practices were typical of common agricultural practices in the corn growing region"	335	na	no	yes	split plot	na				V6 to R1	yes	0.33	3	no insecticide	na
498	14	Bhatti2005	Bhatti, M. A., J. Duan, G. P. Head, C. Jiang, M. J. McKee, T. E. Nickson, C. L. Pilcher, and C. D. Pilcher	2005	Environmental Entomology	34(5): 1325-1335	Field evaluation of the impact of corn rootworm (Coleoptera: Chrysomelidae)-protected Bt corn on ground-dwelling invertebrates	private	seed-chemical industry	yes	USA	North America	field	study	no	na	no	maize	maize	IMI	IMI	0.6	na	MON 863	yes	yes	na	Monsanto research farm in Monmouth	IL	1	2000	Bhatti2005-1-2000	Table 2	"agronomic practices were typical of common agricultural practices in the corn growing region"	335	na	no	yes	split plot	na				V6 to R1	yes	0.33	3	no insecticide	na
501	14	Bhatti2005	Bhatti, M. A., J. Duan, G. P. Head, C. Jiang, M. J. McKee, T. E. Nickson, C. L. Pilcher, and C. D. Pilcher	2005	Environmental Entomology	34(5): 1325-1335	Field evaluation of the impact of corn rootworm (Coleoptera: Chrysomelidae)-protected Bt corn on ground-dwelling invertebrates	private	seed-chemical industry	yes	USA	North America	field	study	no	na	no	maize	maize	IMI	IMI	0.6	na	RX670	no	na	na	Monsanto research farm in Monmouth	IL	1	2000	Bhatti2005-1-2000	Table 2	"agronomic practices were typical of common agricultural practices in the corn growing region"	335	na	no	yes	split plot	na				V6 to R1	yes	0.33	3	no insecticide	na
504	14	Bhatti2005	Bhatti, M. A., J. Duan, G. P. Head, C. Jiang, M. J. McKee, T. E. Nickson, C. L. Pilcher, and C. D. Pilcher	2005	Environmental Entomology	34(5): 1325-1335	Field evaluation of the impact of corn rootworm (Coleoptera: Chrysomelidae)-protected Bt corn on ground-dwelling invertebrates	private	seed-chemical industry	yes	USA	North America	field	study	no	na	no	maize	maize	IMI	IMI	0.6	na	MON 863	yes	yes	na	Monsanto research farm in Monmouth	IL	1	2001	Bhatti2005-1-2001	Table 2	"agronomic practices were typical of common agricultural practices in the corn growing region"	335	na	no	yes	split plot	na				V6 to R1	yes	0.33	3	no insecticide	na
507	14	Bhatti2005	Bhatti, M. A., J. Duan, G. P. Head, C. Jiang, M. J. McKee, T. E. Nickson, C. L. Pilcher, and C. D. Pilcher	2005	Environmental Entomology	34(5): 1325-1335	Field evaluation of the impact of corn rootworm (Coleoptera: Chrysomelidae)-protected Bt corn on ground-dwelling invertebrates	private	seed-chemical industry	yes	USA	North America	field	study	no	na	no	maize	maize	IMI	IMI	0.6	na	RX670	no	na	na	Monsanto research farm in Monmouth	IL	1	2001	Bhatti2005-1-2001	Table 2	"agronomic practices were typical of common agricultural practices in the corn growing region"	335	na	no	yes	split plot	na				V6 to R1	yes	0.33	3	no insecticide	na
510	14	Bhatti2005	Bhatti, M. A., J. Duan, G. P. Head, C. Jiang, M. J. McKee, T. E. Nickson, C. L. Pilcher, and C. D. Pilcher	2005	Environmental Entomology	34(5): 1325-1335	Field evaluation of the impact of corn rootworm (Coleoptera: Chrysomelidae)-protected Bt corn on ground-dwelling invertebrates	private	seed-chemical industry	yes	USA	North America	field	study	no	na	no	maize	maize	IMI	IMI	0.6	na	MON 863	yes	yes	na	Monsanto research farm in Monmouth	IL	1	2002	Bhatti2005-1-2002	Table 2	"agronomic practices were typical of common agricultural practices in the corn growing region"	335	na	no	yes	split plot	na				V6 to R1	yes	0.33	3	no insecticide	na
513	14	Bhatti2005	Bhatti, M. A., J. Duan, G. P. Head, C. Jiang, M. J. McKee, T. E. Nickson, C. L. Pilcher, and C. D. Pilcher	2005	Environmental Entomology	34(5): 1325-1335	Field evaluation of the impact of corn rootworm (Coleoptera: Chrysomelidae)-protected Bt corn on ground-dwelling invertebrates	private	seed-chemical industry	yes	USA	North America	field	study	no	na	no	maize	maize	IMI	IMI	0.6	na	RX670	no	na	na	Monsanto research farm in Monmouth	IL	1	2002	Bhatti2005-1-2002	Table 2	"agronomic practices were typical of common agricultural practices in the corn growing region"	335	na	no	yes	split plot	na				V6 to R1	yes	0.33	3	no insecticide	na
516	14	Bhatti2005	Bhatti, M. A., J. Duan, G. P. Head, C. Jiang, M. J. McKee, T. E. Nickson, C. L. Pilcher, and C. D. Pilcher	2005	Environmental Entomology	34(5): 1325-1335	Field evaluation of the impact of corn rootworm (Coleoptera: Chrysomelidae)-protected Bt corn on ground-dwelling invertebrates	private	seed-chemical industry	yes	USA	North America	field	study	no	na	no	maize	maize	IMI	IMI	0.6	na	MON 863	yes	yes	na	Monsanto research farm in Monmouth	IL	1	2000	Bhatti2005-1-2000	Table 2	"agronomic practices were typical of common agricultural practices in the corn growing region"	335	na	no	yes	split plot	na				V6 to R1	yes	0.33	3	no insecticide	na
519	14	Bhatti2005	Bhatti, M. A., J. Duan, G. P. Head, C. Jiang, M. J. McKee, T. E. Nickson, C. L. Pilcher, and C. D. Pilcher	2005	Environmental Entomology	34(5): 1325-1335	Field evaluation of the impact of corn rootworm (Coleoptera: Chrysomelidae)-protected Bt corn on ground-dwelling invertebrates	private	seed-chemical industry	yes	USA	North America	field	study	no	na	no	maize	maize	IMI	IMI	0.6	na	RX670	no	na	na	Monsanto research farm in Monmouth	IL	1	2000	Bhatti2005-1-2000	Table 2	"agronomic practices were typical of common agricultural practices in the corn growing region"	335	na	no	yes	split plot	na				V6 to R1	yes	0.33	3	no insecticide	na
522	14	Bhatti2005	Bhatti, M. A., J. Duan, G. P. Head, C. Jiang, M. J. McKee, T. E. Nickson, C. L. Pilcher, and C. D. Pilcher	2005	Environmental Entomology	34(5): 1325-1335	Field evaluation of the impact of corn rootworm (Coleoptera: Chrysomelidae)-protected Bt corn on ground-dwelling invertebrates	private	seed-chemical industry	yes	USA	North America	field	study	no	na	no	maize	maize	IMI	IMI	0.6	na	MON 863	yes	yes	na	Monsanto research farm in Monmouth	IL	1	2001	Bhatti2005-1-2001	Table 2	"agronomic practices were typical of common agricultural practices in the corn growing region"	335	na	no	yes	split plot	na				V6 to R1	yes	0.33	3	no insecticide	na
525	14	Bhatti2005	Bhatti, M. A., J. Duan, G. P. Head, C. Jiang, M. J. McKee, T. E. Nickson, C. L. Pilcher, and C. D. Pilcher	2005	Environmental Entomology	34(5): 1325-1335	Field evaluation of the impact of corn rootworm (Coleoptera: Chrysomelidae)-protected Bt corn on ground-dwelling invertebrates	private	seed-chemical industry	yes	USA	North America	field	study	no	na	no	maize	maize	IMI	IMI	0.6	na	RX670	no	na	na	Monsanto research farm in Monmouth	IL	1	2001	Bhatti2005-1-2001	Table 2	"agronomic practices were typical of common agricultural practices in the corn growing region"	335	na	no	yes	split plot	na				V6 to R1	yes	0.33	3	no insecticide	na
528	14	Bhatti2005	Bhatti, M. A., J. Duan, G. P. Head, C. Jiang, M. J. McKee, T. E. Nickson, C. L. Pilcher, and C. D. Pilcher	2005	Environmental Entomology	34(5): 1325-1335	Field evaluation of the impact of corn rootworm (Coleoptera: Chrysomelidae)-protected Bt corn on ground-dwelling invertebrates	private	seed-chemical industry	yes	USA	North America	field	study	no	na	no	maize	maize	IMI	IMI	0.6	na	MON 863	yes	yes	na	Monsanto research farm in Monmouth	IL	1	2002	Bhatti2005-1-2002	Table 2	"agronomic practices were typical of common agricultural practices in the corn growing region"	335	na	no	yes	split plot	na				V6 to R1	yes	0.33	3	no insecticide	na
531	14	Bhatti2005	Bhatti, M. A., J. Duan, G. P. Head, C. Jiang, M. J. McKee, T. E. Nickson, C. L. Pilcher, and C. D. Pilcher	2005	Environmental Entomology	34(5): 1325-1335	Field evaluation of the impact of corn rootworm (Coleoptera: Chrysomelidae)-protected Bt corn on ground-dwelling invertebrates	private	seed-chemical industry	yes	USA	North America	field	study	no	na	no	maize	maize	IMI	IMI	0.6	na	RX670	no	na	na	Monsanto research farm in Monmouth	IL	1	2002	Bhatti2005-1-2002	Table 2	"agronomic practices were typical of common agricultural practices in the corn growing region"	335	na	no	yes	split plot	na				V6 to R1	yes	0.33	3	no insecticide	na
534	14	Bhatti2005	Bhatti, M. A., J. Duan, G. P. Head, C. Jiang, M. J. McKee, T. E. Nickson, C. L. Pilcher, and C. D. Pilcher	2005	Environmental Entomology	34(5): 1325-1335	Field evaluation of the impact of corn rootworm (Coleoptera: Chrysomelidae)-protected Bt corn on ground-dwelling invertebrates	private	seed-chemical industry	yes	USA	North America	field	study	no	na	no	maize	maize	IMI	IMI	0.6	na	MON 863	yes	yes	na	Monsanto research farm in Monmouth	IL	1	2000	Bhatti2005-1-2000	Table 2	"agronomic practices were typical of common agricultural practices in the corn growing region"	335	na	no	yes	split plot	na				V6 to R1	yes	0.33	3	no insecticide	na
537	14	Bhatti2005	Bhatti, M. A., J. Duan, G. P. Head, C. Jiang, M. J. McKee, T. E. Nickson, C. L. Pilcher, and C. D. Pilcher	2005	Environmental Entomology	34(5): 1325-1335	Field evaluation of the impact of corn rootworm (Coleoptera: Chrysomelidae)-protected Bt corn on ground-dwelling invertebrates	private	seed-chemical industry	yes	USA	North America	field	study	no	na	no	maize	maize	IMI	IMI	0.6	na	RX670	no	na	na	Monsanto research farm in Monmouth	IL	1	2000	Bhatti2005-1-2000	Table 2	"agronomic practices were typical of common agricultural practices in the corn growing region"	335	na	no	yes	split plot	na				V6 to R1	yes	0.33	3	no insecticide	na
540	14	Bhatti2005	Bhatti, M. A., J. Duan, G. P. Head, C. Jiang, M. J. McKee, T. E. Nickson, C. L. Pilcher, and C. D. Pilcher	2005	Environmental Entomology	34(5): 1325-1335	Field evaluation of the impact of corn rootworm (Coleoptera: Chrysomelidae)-protected Bt corn on ground-dwelling invertebrates	private	seed-chemical industry	yes	USA	North America	field	study	no	na	no	maize	maize	IMI	IMI	0.6	na	MON 863	yes	yes	na	Monsanto research farm in Monmouth	IL	1	2001	Bhatti2005-1-2001	Table 2	"agronomic practices were typical of common agricultural practices in the corn growing region"	335	na	no	yes	split plot	na				V6 to R1	yes	0.33	3	no insecticide	na
543	14	Bhatti2005	Bhatti, M. A., J. Duan, G. P. Head, C. Jiang, M. J. McKee, T. E. Nickson, C. L. Pilcher, and C. D. Pilcher	2005	Environmental Entomology	34(5): 1325-1335	Field evaluation of the impact of corn rootworm (Coleoptera: Chrysomelidae)-protected Bt corn on ground-dwelling invertebrates	private	seed-chemical industry	yes	USA	North America	field	study	no	na	no	maize	maize	IMI	IMI	0.6	na	RX670	no	na	na	Monsanto research farm in Monmouth	IL	1	2001	Bhatti2005-1-2001	Table 2	"agronomic practices were typical of common agricultural practices in the corn growing region"	335	na	no	yes	split plot	na				V6 to R1	yes	0.33	3	no insecticide	na
546	14	Bhatti2005	Bhatti, M. A., J. Duan, G. P. Head, C. Jiang, M. J. McKee, T. E. Nickson, C. L. Pilcher, and C. D. Pilcher	2005	Environmental Entomology	34(5): 1325-1335	Field evaluation of the impact of corn rootworm (Coleoptera: Chrysomelidae)-protected Bt corn on ground-dwelling invertebrates	private	seed-chemical industry	yes	USA	North America	field	study	no	na	no	maize	maize	IMI	IMI	0.6	na	MON 863	yes	yes	na	Monsanto research farm in Monmouth	IL	1	2002	Bhatti2005-1-2002	Table 2	"agronomic practices were typical of common agricultural practices in the corn growing region"	335	na	no	yes	split plot	na				V6 to R1	yes	0.33	3	no insecticide	na
549	14	Bhatti2005	Bhatti, M. A., J. Duan, G. P. Head, C. Jiang, M. J. McKee, T. E. Nickson, C. L. Pilcher, and C. D. Pilcher	2005	Environmental Entomology	34(5): 1325-1335	Field evaluation of the impact of corn rootworm (Coleoptera: Chrysomelidae)-protected Bt corn on ground-dwelling invertebrates	private	seed-chemical industry	yes	USA	North America	field	study	no	na	no	maize	maize	IMI	IMI	0.6	na	RX670	no	na	na	Monsanto research farm in Monmouth	IL	1	2002	Bhatti2005-1-2002	Table 2	"agronomic practices were typical of common agricultural practices in the corn growing region"	335	na	no	yes	split plot	na				V6 to R1	yes	0.33	3	no insecticide	na
552	14	Bhatti2005	Bhatti, M. A., J. Duan, G. P. Head, C. Jiang, M. J. McKee, T. E. Nickson, C. L. Pilcher, and C. D. Pilcher	2005	Environmental Entomology	34(5): 1325-1335	Field evaluation of the impact of corn rootworm (Coleoptera: Chrysomelidae)-protected Bt corn on ground-dwelling invertebrates	private	seed-chemical industry	yes	USA	North America	field	study	no	na	no	maize	maize	IMI	IMI	0.6	na	MON 863	yes	yes	na	Monsanto research farm in Monmouth	IL	1	2000	Bhatti2005-1-2000	Table 2	"agronomic practices were typical of common agricultural practices in the corn growing region"	335	na	no	yes	split plot	na				V6 to R1	yes	0.33	3	no insecticide	na
555	14	Bhatti2005	Bhatti, M. A., J. Duan, G. P. Head, C. Jiang, M. J. McKee, T. E. Nickson, C. L. Pilcher, and C. D. Pilcher	2005	Environmental Entomology	34(5): 1325-1335	Field evaluation of the impact of corn rootworm (Coleoptera: Chrysomelidae)-protected Bt corn on ground-dwelling invertebrates	private	seed-chemical industry	yes	USA	North America	field	study	no	na	no	maize	maize	IMI	IMI	0.6	na	RX670	no	na	na	Monsanto research farm in Monmouth	IL	1	2000	Bhatti2005-1-2000	Table 2	"agronomic practices were typical of common agricultural practices in the corn growing region"	335	na	no	yes	split plot	na				V6 to R1	yes	0.33	3	no insecticide	na
558	14	Bhatti2005	Bhatti, M. A., J. Duan, G. P. Head, C. Jiang, M. J. McKee, T. E. Nickson, C. L. Pilcher, and C. D. Pilcher	2005	Environmental Entomology	34(5): 1325-1335	Field evaluation of the impact of corn rootworm (Coleoptera: Chrysomelidae)-protected Bt corn on ground-dwelling invertebrates	private	seed-chemical industry	yes	USA	North America	field	study	no	na	no	maize	maize	IMI	IMI	0.6	na	MON 863	yes	yes	na	Monsanto research farm in Monmouth	IL	1	2001	Bhatti2005-1-2001	Table 2	"agronomic practices were typical of common agricultural practices in the corn growing region"	335	na	no	yes	split plot	na				V6 to R1	yes	0.33	3	no insecticide	na
561	14	Bhatti2005	Bhatti, M. A., J. Duan, G. P. Head, C. Jiang, M. J. McKee, T. E. Nickson, C. L. Pilcher, and C. D. Pilcher	2005	Environmental Entomology	34(5): 1325-1335	Field evaluation of the impact of corn rootworm (Coleoptera: Chrysomelidae)-protected Bt corn on ground-dwelling invertebrates	private	seed-chemical industry	yes	USA	North America	field	study	no	na	no	maize	maize	IMI	IMI	0.6	na	RX670	no	na	na	Monsanto research farm in Monmouth	IL	1	2001	Bhatti2005-1-2001	Table 2	"agronomic practices were typical of common agricultural practices in the corn growing region"	335	na	no	yes	split plot	na				V6 to R1	yes	0.33	3	no insecticide	na
564	14	Bhatti2005	Bhatti, M. A., J. Duan, G. P. Head, C. Jiang, M. J. McKee, T. E. Nickson, C. L. Pilcher, and C. D. Pilcher	2005	Environmental Entomology	34(5): 1325-1335	Field evaluation of the impact of corn rootworm (Coleoptera: Chrysomelidae)-protected Bt corn on ground-dwelling invertebrates	private	seed-chemical industry	yes	USA	North America	field	study	no	na	no	maize	maize	IMI	IMI	0.6	na	MON 863	yes	yes	na	Monsanto research farm in Monmouth	IL	1	2002	Bhatti2005-1-2002	Table 2	"agronomic practices were typical of common agricultural practices in the corn growing region"	335	na	no	yes	split plot	na				V6 to R1	yes	0.33	3	no insecticide	na
567	14	Bhatti2005	Bhatti, M. A., J. Duan, G. P. Head, C. Jiang, M. J. McKee, T. E. Nickson, C. L. Pilcher, and C. D. Pilcher	2005	Environmental Entomology	34(5): 1325-1335	Field evaluation of the impact of corn rootworm (Coleoptera: Chrysomelidae)-protected Bt corn on ground-dwelling invertebrates	private	seed-chemical industry	yes	USA	North America	field	study	no	na	no	maize	maize	IMI	IMI	0.6	na	RX670	no	na	na	Monsanto research farm in Monmouth	IL	1	2002	Bhatti2005-1-2002	Table 2	"agronomic practices were typical of common agricultural practices in the corn growing region"	335	na	no	yes	split plot	na				V6 to R1	yes	0.33	3	no insecticide	na
570	14	Bhatti2005	Bhatti, M. A., J. Duan, G. P. Head, C. Jiang, M. J. McKee, T. E. Nickson, C. L. Pilcher, and C. D. Pilcher	2005	Environmental Entomology	34(5): 1325-1335	Field evaluation of the impact of corn rootworm (Coleoptera: Chrysomelidae)-protected Bt corn on ground-dwelling invertebrates	private	seed-chemical industry	yes	USA	North America	field	study	no	na	no	maize	maize	IMI	IMI	0.6	na	MON 863	yes	yes	na	Monsanto research farm in Monmouth	IL	1	2000	Bhatti2005-1-2000	Table 2	"agronomic practices were typical of common agricultural practices in the corn growing region"	335	na	no	yes	split plot	na				V6 to R1	yes	0.33	3	no insecticide	na
573	14	Bhatti2005	Bhatti, M. A., J. Duan, G. P. Head, C. Jiang, M. J. McKee, T. E. Nickson, C. L. Pilcher, and C. D. Pilcher	2005	Environmental Entomology	34(5): 1325-1335	Field evaluation of the impact of corn rootworm (Coleoptera: Chrysomelidae)-protected Bt corn on ground-dwelling invertebrates	private	seed-chemical industry	yes	USA	North America	field	study	no	na	no	maize	maize	IMI	IMI	0.6	na	RX670	no	na	na	Monsanto research farm in Monmouth	IL	1	2000	Bhatti2005-1-2000	Table 2	"agronomic practices were typical of common agricultural practices in the corn growing region"	335	na	no	yes	split plot	na				V6 to R1	yes	0.33	3	no insecticide	na
576	14	Bhatti2005	Bhatti, M. A., J. Duan, G. P. Head, C. Jiang, M. J. McKee, T. E. Nickson, C. L. Pilcher, and C. D. Pilcher	2005	Environmental Entomology	34(5): 1325-1335	Field evaluation of the impact of corn rootworm (Coleoptera: Chrysomelidae)-protected Bt corn on ground-dwelling invertebrates	private	seed-chemical industry	yes	USA	North America	field	study	no	na	no	maize	maize	IMI	IMI	0.6	na	MON 863	yes	yes	na	Monsanto research farm in Monmouth	IL	1	2001	Bhatti2005-1-2001	Table 2	"agronomic practices were typical of common agricultural practices in the corn growing region"	335	na	no	yes	split plot	na				V6 to R1	yes	0.33	3	no insecticide	na
579	14	Bhatti2005	Bhatti, M. A., J. Duan, G. P. Head, C. Jiang, M. J. McKee, T. E. Nickson, C. L. Pilcher, and C. D. Pilcher	2005	Environmental Entomology	34(5): 1325-1335	Field evaluation of the impact of corn rootworm (Coleoptera: Chrysomelidae)-protected Bt corn on ground-dwelling invertebrates	private	seed-chemical industry	yes	USA	North America	field	study	no	na	no	maize	maize	IMI	IMI	0.6	na	RX670	no	na	na	Monsanto research farm in Monmouth	IL	1	2001	Bhatti2005-1-2001	Table 2	"agronomic practices were typical of common agricultural practices in the corn growing region"	335	na	no	yes	split plot	na				V6 to R1	yes	0.33	3	no insecticide	na
582	14	Bhatti2005	Bhatti, M. A., J. Duan, G. P. Head, C. Jiang, M. J. McKee, T. E. Nickson, C. L. Pilcher, and C. D. Pilcher	2005	Environmental Entomology	34(5): 1325-1335	Field evaluation of the impact of corn rootworm (Coleoptera: Chrysomelidae)-protected Bt corn on ground-dwelling invertebrates	private	seed-chemical industry	yes	USA	North America	field	study	no	na	no	maize	maize	IMI	IMI	0.6	na	MON 863	yes	yes	na	Monsanto research farm in Monmouth	IL	1	2002	Bhatti2005-1-2002	Table 2	"agronomic practices were typical of common agricultural practices in the corn growing region"	335	na	no	yes	split plot	na				V6 to R1	yes	0.33	3	no insecticide	na
585	14	Bhatti2005	Bhatti, M. A., J. Duan, G. P. Head, C. Jiang, M. J. McKee, T. E. Nickson, C. L. Pilcher, and C. D. Pilcher	2005	Environmental Entomology	34(5): 1325-1335	Field evaluation of the impact of corn rootworm (Coleoptera: Chrysomelidae)-protected Bt corn on ground-dwelling invertebrates	private	seed-chemical industry	yes	USA	North America	field	study	no	na	no	maize	maize	IMI	IMI	0.6	na	RX670	no	na	na	Monsanto research farm in Monmouth	IL	1	2002	Bhatti2005-1-2002	Table 2	"agronomic practices were typical of common agricultural practices in the corn growing region"	335	na	no	yes	split plot	na				V6 to R1	yes	0.33	3	no insecticide	na
588	14	Bhatti2005	Bhatti, M. A., J. Duan, G. P. Head, C. Jiang, M. J. McKee, T. E. Nickson, C. L. Pilcher, and C. D. Pilcher	2005	Environmental Entomology	34(5): 1325-1335	Field evaluation of the impact of corn rootworm (Coleoptera: Chrysomelidae)-protected Bt corn on ground-dwelling invertebrates	private	seed-chemical industry	yes	USA	North America	field	study	no	na	no	maize	maize	IMI	IMI	0.6	na	MON 863	yes	yes	na	Monsanto research farm in Monmouth	IL	1	2000	Bhatti2005-1-2000	Table 2	"agronomic practices were typical of common agricultural practices in the corn growing region"	335	na	no	yes	split plot	na				V6 to R1	yes	0.33	3	no insecticide	na
591	14	Bhatti2005	Bhatti, M. A., J. Duan, G. P. Head, C. Jiang, M. J. McKee, T. E. Nickson, C. L. Pilcher, and C. D. Pilcher	2005	Environmental Entomology	34(5): 1325-1335	Field evaluation of the impact of corn rootworm (Coleoptera: Chrysomelidae)-protected Bt corn on ground-dwelling invertebrates	private	seed-chemical industry	yes	USA	North America	field	study	no	na	no	maize	maize	IMI	IMI	0.6	na	RX670	no	na	na	Monsanto research farm in Monmouth	IL	1	2000	Bhatti2005-1-2000	Table 2	"agronomic practices were typical of common agricultural practices in the corn growing region"	335	na	no	yes	split plot	na				V6 to R1	yes	0.33	3	no insecticide	na
594	14	Bhatti2005	Bhatti, M. A., J. Duan, G. P. Head, C. Jiang, M. J. McKee, T. E. Nickson, C. L. Pilcher, and C. D. Pilcher	2005	Environmental Entomology	34(5): 1325-1335	Field evaluation of the impact of corn rootworm (Coleoptera: Chrysomelidae)-protected Bt corn on ground-dwelling invertebrates	private	seed-chemical industry	yes	USA	North America	field	study	no	na	no	maize	maize	IMI	IMI	0.6	na	MON 863	yes	yes	na	Monsanto research farm in Monmouth	IL	1	2001	Bhatti2005-1-2001	Table 2	"agronomic practices were typical of common agricultural practices in the corn growing region"	335	na	no	yes	split plot	na				V6 to R1	yes	0.33	3	no insecticide	na
597	14	Bhatti2005	Bhatti, M. A., J. Duan, G. P. Head, C. Jiang, M. J. McKee, T. E. Nickson, C. L. Pilcher, and C. D. Pilcher	2005	Environmental Entomology	34(5): 1325-1335	Field evaluation of the impact of corn rootworm (Coleoptera: Chrysomelidae)-protected Bt corn on ground-dwelling invertebrates	private	seed-chemical industry	yes	USA	North America	field	study	no	na	no	maize	maize	IMI	IMI	0.6	na	RX670	no	na	na	Monsanto research farm in Monmouth	IL	1	2001	Bhatti2005-1-2001	Table 2	"agronomic practices were typical of common agricultural practices in the corn growing region"	335	na	no	yes	split plot	na				V6 to R1	yes	0.33	3	no insecticide	na
600	14	Bhatti2005	Bhatti, M. A., J. Duan, G. P. Head, C. Jiang, M. J. McKee, T. E. Nickson, C. L. Pilcher, and C. D. Pilcher	2005	Environmental Entomology	34(5): 1325-1335	Field evaluation of the impact of corn rootworm (Coleoptera: Chrysomelidae)-protected Bt corn on ground-dwelling invertebrates	private	seed-chemical industry	yes	USA	North America	field	study	no	na	no	maize	maize	IMI	IMI	0.6	na	MON 863	yes	yes	na	Monsanto research farm in Monmouth	IL	1	2002	Bhatti2005-1-2002	Table 2	"agronomic practices were typical of common agricultural practices in the corn growing region"	335	na	no	yes	split plot	na				V6 to R1	yes	0.33	3	no insecticide	na
603	14	Bhatti2005	Bhatti, M. A., J. Duan, G. P. Head, C. Jiang, M. J. McKee, T. E. Nickson, C. L. Pilcher, and C. D. Pilcher	2005	Environmental Entomology	34(5): 1325-1335	Field evaluation of the impact of corn rootworm (Coleoptera: Chrysomelidae)-protected Bt corn on ground-dwelling invertebrates	private	seed-chemical industry	yes	USA	North America	field	study	no	na	no	maize	maize	IMI	IMI	0.6	na	RX670	no	na	na	Monsanto research farm in Monmouth	IL	1	2002	Bhatti2005-1-2002	Table 2	"agronomic practices were typical of common agricultural practices in the corn growing region"	335	na	no	yes	split plot	na				V6 to R1	yes	0.33	3	no insecticide	na
606	14	Bhatti2005	Bhatti, M. A., J. Duan, G. P. Head, C. Jiang, M. J. McKee, T. E. Nickson, C. L. Pilcher, and C. D. Pilcher	2005	Environmental Entomology	34(5): 1325-1335	Field evaluation of the impact of corn rootworm (Coleoptera: Chrysomelidae)-protected Bt corn on ground-dwelling invertebrates	private	seed-chemical industry	yes	USA	North America	field	study	no	na	no	maize	maize	IMI	IMI	0.6	na	MON 863	yes	yes	na	Monsanto research farm in Monmouth	IL	1	2000	Bhatti2005-1-2000	Table 5	"agronomic practices were typical of common agricultural practices in the corn growing region"	335	na	no	yes	split plot	na				V6 to R4	yes	0.25	4	no insecticide	na
609	14	Bhatti2005	Bhatti, M. A., J. Duan, G. P. Head, C. Jiang, M. J. McKee, T. E. Nickson, C. L. Pilcher, and C. D. Pilcher	2005	Environmental Entomology	34(5): 1325-1335	Field evaluation of the impact of corn rootworm (Coleoptera: Chrysomelidae)-protected Bt corn on ground-dwelling invertebrates	private	seed-chemical industry	yes	USA	North America	field	study	no	na	no	maize	maize	IMI	IMI	0.6	na	RX670	no	na	na	Monsanto research farm in Monmouth	IL	1	2000	Bhatti2005-1-2000	Table 5	"agronomic practices were typical of common agricultural practices in the corn growing region"	335	na	no	yes	split plot	na				V6 to R4	yes	0.25	4	no insecticide	na
612	14	Bhatti2005	Bhatti, M. A., J. Duan, G. P. Head, C. Jiang, M. J. McKee, T. E. Nickson, C. L. Pilcher, and C. D. Pilcher	2005	Environmental Entomology	34(5): 1325-1335	Field evaluation of the impact of corn rootworm (Coleoptera: Chrysomelidae)-protected Bt corn on ground-dwelling invertebrates	private	seed-chemical industry	yes	USA	North America	field	study	no	na	no	maize	maize	IMI	IMI	0.6	na	MON 863	yes	yes	na	Monsanto research farm in Monmouth	IL	1	2001	Bhatti2005-1-2001	Table 5	"agronomic practices were typical of common agricultural practices in the corn growing region"	335	na	no	yes	split plot	na				V6 to R4	yes	0.25	4	no insecticide	na
615	14	Bhatti2005	Bhatti, M. A., J. Duan, G. P. Head, C. Jiang, M. J. McKee, T. E. Nickson, C. L. Pilcher, and C. D. Pilcher	2005	Environmental Entomology	34(5): 1325-1335	Field evaluation of the impact of corn rootworm (Coleoptera: Chrysomelidae)-protected Bt corn on ground-dwelling invertebrates	private	seed-chemical industry	yes	USA	North America	field	study	no	na	no	maize	maize	IMI	IMI	0.6	na	RX670	no	na	na	Monsanto research farm in Monmouth	IL	1	2001	Bhatti2005-1-2001	Table 5	"agronomic practices were typical of common agricultural practices in the corn growing region"	335	na	no	yes	split plot	na				V6 to R4	yes	0.25	4	no insecticide	na
618	14	Bhatti2005	Bhatti, M. A., J. Duan, G. P. Head, C. Jiang, M. J. McKee, T. E. Nickson, C. L. Pilcher, and C. D. Pilcher	2005	Environmental Entomology	34(5): 1325-1335	Field evaluation of the impact of corn rootworm (Coleoptera: Chrysomelidae)-protected Bt corn on ground-dwelling invertebrates	private	seed-chemical industry	yes	USA	North America	field	study	no	na	no	maize	maize	IMI	IMI	0.6	na	MON 863	yes	yes	na	Monsanto research farm in Monmouth	IL	1	2002	Bhatti2005-1-2002	Table 5	"agronomic practices were typical of common agricultural practices in the corn growing region"	335	na	no	yes	split plot	na				V6 to R4	yes	0.25	4	no insecticide	na
621	14	Bhatti2005	Bhatti, M. A., J. Duan, G. P. Head, C. Jiang, M. J. McKee, T. E. Nickson, C. L. Pilcher, and C. D. Pilcher	2005	Environmental Entomology	34(5): 1325-1335	Field evaluation of the impact of corn rootworm (Coleoptera: Chrysomelidae)-protected Bt corn on ground-dwelling invertebrates	private	seed-chemical industry	yes	USA	North America	field	study	no	na	no	maize	maize	IMI	IMI	0.6	na	RX670	no	na	na	Monsanto research farm in Monmouth	IL	1	2002	Bhatti2005-1-2002	Table 5	"agronomic practices were typical of common agricultural practices in the corn growing region"	335	na	no	yes	split plot	na				V6 to R4	yes	0.25	4	no insecticide	na
624	14	Bhatti2005	Bhatti, M. A., J. Duan, G. P. Head, C. Jiang, M. J. McKee, T. E. Nickson, C. L. Pilcher, and C. D. Pilcher	2005	Environmental Entomology	34(5): 1325-1335	Field evaluation of the impact of corn rootworm (Coleoptera: Chrysomelidae)-protected Bt corn on ground-dwelling invertebrates	private	seed-chemical industry	yes	USA	North America	field	study	no	na	no	maize	maize	IMI	IMI	0.6	na	MON 863	yes	yes	na	Monsanto research farm in Monmouth	IL	1	2000	Bhatti2005-1-2000	Table 5	"agronomic practices were typical of common agricultural practices in the corn growing region"	335	na	no	yes	split plot	na				V6 to R4	yes	0.25	4	no insecticide	na
627	14	Bhatti2005	Bhatti, M. A., J. Duan, G. P. Head, C. Jiang, M. J. McKee, T. E. Nickson, C. L. Pilcher, and C. D. Pilcher	2005	Environmental Entomology	34(5): 1325-1335	Field evaluation of the impact of corn rootworm (Coleoptera: Chrysomelidae)-protected Bt corn on ground-dwelling invertebrates	private	seed-chemical industry	yes	USA	North America	field	study	no	na	no	maize	maize	IMI	IMI	0.6	na	RX670	no	na	na	Monsanto research farm in Monmouth	IL	1	2000	Bhatti2005-1-2000	Table 5	"agronomic practices were typical of common agricultural practices in the corn growing region"	335	na	no	yes	split plot	na				V6 to R4	yes	0.25	4	no insecticide	na
630	14	Bhatti2005	Bhatti, M. A., J. Duan, G. P. Head, C. Jiang, M. J. McKee, T. E. Nickson, C. L. Pilcher, and C. D. Pilcher	2005	Environmental Entomology	34(5): 1325-1335	Field evaluation of the impact of corn rootworm (Coleoptera: Chrysomelidae)-protected Bt corn on ground-dwelling invertebrates	private	seed-chemical industry	yes	USA	North America	field	study	no	na	no	maize	maize	IMI	IMI	0.6	na	MON 863	yes	yes	na	Monsanto research farm in Monmouth	IL	1	2001	Bhatti2005-1-2001	Table 5	"agronomic practices were typical of common agricultural practices in the corn growing region"	335	na	no	yes	split plot	na				V6 to R4	yes	0.25	4	no insecticide	na
633	14	Bhatti2005	Bhatti, M. A., J. Duan, G. P. Head, C. Jiang, M. J. McKee, T. E. Nickson, C. L. Pilcher, and C. D. Pilcher	2005	Environmental Entomology	34(5): 1325-1335	Field evaluation of the impact of corn rootworm (Coleoptera: Chrysomelidae)-protected Bt corn on ground-dwelling invertebrates	private	seed-chemical industry	yes	USA	North America	field	study	no	na	no	maize	maize	IMI	IMI	0.6	na	RX670	no	na	na	Monsanto research farm in Monmouth	IL	1	2001	Bhatti2005-1-2001	Table 5	"agronomic practices were typical of common agricultural practices in the corn growing region"	335	na	no	yes	split plot	na				V6 to R4	yes	0.25	4	no insecticide	na
636	14	Bhatti2005	Bhatti, M. A., J. Duan, G. P. Head, C. Jiang, M. J. McKee, T. E. Nickson, C. L. Pilcher, and C. D. Pilcher	2005	Environmental Entomology	34(5): 1325-1335	Field evaluation of the impact of corn rootworm (Coleoptera: Chrysomelidae)-protected Bt corn on ground-dwelling invertebrates	private	seed-chemical industry	yes	USA	North America	field	study	no	na	no	maize	maize	IMI	IMI	0.6	na	MON 863	yes	yes	na	Monsanto research farm in Monmouth	IL	1	2002	Bhatti2005-1-2002	Table 5	"agronomic practices were typical of common agricultural practices in the corn growing region"	335	na	no	yes	split plot	na				V6 to R4	yes	0.25	4	no insecticide	na
639	14	Bhatti2005	Bhatti, M. A., J. Duan, G. P. Head, C. Jiang, M. J. McKee, T. E. Nickson, C. L. Pilcher, and C. D. Pilcher	2005	Environmental Entomology	34(5): 1325-1335	Field evaluation of the impact of corn rootworm (Coleoptera: Chrysomelidae)-protected Bt corn on ground-dwelling invertebrates	private	seed-chemical industry	yes	USA	North America	field	study	no	na	no	maize	maize	IMI	IMI	0.6	na	RX670	no	na	na	Monsanto research farm in Monmouth	IL	1	2002	Bhatti2005-1-2002	Table 5	"agronomic practices were typical of common agricultural practices in the corn growing region"	335	na	no	yes	split plot	na				V6 to R4	yes	0.25	4	no insecticide	na
642	14	Bhatti2005	Bhatti, M. A., J. Duan, G. P. Head, C. Jiang, M. J. McKee, T. E. Nickson, C. L. Pilcher, and C. D. Pilcher	2005	Environmental Entomology	34(5): 1325-1335	Field evaluation of the impact of corn rootworm (Coleoptera: Chrysomelidae)-protected Bt corn on ground-dwelling invertebrates	private	seed-chemical industry	yes	USA	North America	field	study	no	na	no	maize	maize	IMI	IMI	0.6	na	MON 863	yes	yes	na	Monsanto research farm in Monmouth	IL	1	2000	Bhatti2005-1-2000	Table 5	"agronomic practices were typical of common agricultural practices in the corn growing region"	335	na	no	yes	split plot	na				V6 to R4	yes	0.25	4	no insecticide	na
645	14	Bhatti2005	Bhatti, M. A., J. Duan, G. P. Head, C. Jiang, M. J. McKee, T. E. Nickson, C. L. Pilcher, and C. D. Pilcher	2005	Environmental Entomology	34(5): 1325-1335	Field evaluation of the impact of corn rootworm (Coleoptera: Chrysomelidae)-protected Bt corn on ground-dwelling invertebrates	private	seed-chemical industry	yes	USA	North America	field	study	no	na	no	maize	maize	IMI	IMI	0.6	na	RX670	no	na	na	Monsanto research farm in Monmouth	IL	1	2000	Bhatti2005-1-2000	Table 5	"agronomic practices were typical of common agricultural practices in the corn growing region"	335	na	no	yes	split plot	na				V6 to R4	yes	0.25	4	no insecticide	na
648	14	Bhatti2005	Bhatti, M. A., J. Duan, G. P. Head, C. Jiang, M. J. McKee, T. E. Nickson, C. L. Pilcher, and C. D. Pilcher	2005	Environmental Entomology	34(5): 1325-1335	Field evaluation of the impact of corn rootworm (Coleoptera: Chrysomelidae)-protected Bt corn on ground-dwelling invertebrates	private	seed-chemical industry	yes	USA	North America	field	study	no	na	no	maize	maize	IMI	IMI	0.6	na	MON 863	yes	yes	na	Monsanto research farm in Monmouth	IL	1	2001	Bhatti2005-1-2001	Table 5	"agronomic practices were typical of common agricultural practices in the corn growing region"	335	na	no	yes	split plot	na				V6 to R4	yes	0.25	4	no insecticide	na
651	14	Bhatti2005	Bhatti, M. A., J. Duan, G. P. Head, C. Jiang, M. J. McKee, T. E. Nickson, C. L. Pilcher, and C. D. Pilcher	2005	Environmental Entomology	34(5): 1325-1335	Field evaluation of the impact of corn rootworm (Coleoptera: Chrysomelidae)-protected Bt corn on ground-dwelling invertebrates	private	seed-chemical industry	yes	USA	North America	field	study	no	na	no	maize	maize	IMI	IMI	0.6	na	RX670	no	na	na	Monsanto research farm in Monmouth	IL	1	2001	Bhatti2005-1-2001	Table 5	"agronomic practices were typical of common agricultural practices in the corn growing region"	335	na	no	yes	split plot	na				V6 to R4	yes	0.25	4	no insecticide	na
654	14	Bhatti2005	Bhatti, M. A., J. Duan, G. P. Head, C. Jiang, M. J. McKee, T. E. Nickson, C. L. Pilcher, and C. D. Pilcher	2005	Environmental Entomology	34(5): 1325-1335	Field evaluation of the impact of corn rootworm (Coleoptera: Chrysomelidae)-protected Bt corn on ground-dwelling invertebrates	private	seed-chemical industry	yes	USA	North America	field	study	no	na	no	maize	maize	IMI	IMI	0.6	na	MON 863	yes	yes	na	Monsanto research farm in Monmouth	IL	1	2002	Bhatti2005-1-2002	Table 5	"agronomic practices were typical of common agricultural practices in the corn growing region"	335	na	no	yes	split plot	na				V6 to R4	yes	0.25	4	no insecticide	na
657	14	Bhatti2005	Bhatti, M. A., J. Duan, G. P. Head, C. Jiang, M. J. McKee, T. E. Nickson, C. L. Pilcher, and C. D. Pilcher	2005	Environmental Entomology	34(5): 1325-1335	Field evaluation of the impact of corn rootworm (Coleoptera: Chrysomelidae)-protected Bt corn on ground-dwelling invertebrates	private	seed-chemical industry	yes	USA	North America	field	study	no	na	no	maize	maize	IMI	IMI	0.6	na	RX670	no	na	na	Monsanto research farm in Monmouth	IL	1	2002	Bhatti2005-1-2002	Table 5	"agronomic practices were typical of common agricultural practices in the corn growing region"	335	na	no	yes	split plot	na				V6 to R4	yes	0.25	4	no insecticide	na
660	14	Bhatti2005	Bhatti, M. A., J. Duan, G. P. Head, C. Jiang, M. J. McKee, T. E. Nickson, C. L. Pilcher, and C. D. Pilcher	2005	Environmental Entomology	34(5): 1325-1335	Field evaluation of the impact of corn rootworm (Coleoptera: Chrysomelidae)-protected Bt corn on ground-dwelling invertebrates	private	seed-chemical industry	yes	USA	North America	field	study	no	na	no	maize	maize	IMI	IMI	0.6	na	MON 863	yes	yes	na	Monsanto research farm in Monmouth	IL	1	2000	Bhatti2005-1-2000	Table 5	"agronomic practices were typical of common agricultural practices in the corn growing region"	335	na	no	yes	split plot	na				V6 to R4	yes	0.25	4	no insecticide	na
663	14	Bhatti2005	Bhatti, M. A., J. Duan, G. P. Head, C. Jiang, M. J. McKee, T. E. Nickson, C. L. Pilcher, and C. D. Pilcher	2005	Environmental Entomology	34(5): 1325-1335	Field evaluation of the impact of corn rootworm (Coleoptera: Chrysomelidae)-protected Bt corn on ground-dwelling invertebrates	private	seed-chemical industry	yes	USA	North America	field	study	no	na	no	maize	maize	IMI	IMI	0.6	na	RX670	no	na	na	Monsanto research farm in Monmouth	IL	1	2000	Bhatti2005-1-2000	Table 5	"agronomic practices were typical of common agricultural practices in the corn growing region"	335	na	no	yes	split plot	na				V6 to R4	yes	0.25	4	no insecticide	na
666	14	Bhatti2005	Bhatti, M. A., J. Duan, G. P. Head, C. Jiang, M. J. McKee, T. E. Nickson, C. L. Pilcher, and C. D. Pilcher	2005	Environmental Entomology	34(5): 1325-1335	Field evaluation of the impact of corn rootworm (Coleoptera: Chrysomelidae)-protected Bt corn on ground-dwelling invertebrates	private	seed-chemical industry	yes	USA	North America	field	study	no	na	no	maize	maize	IMI	IMI	0.6	na	MON 863	yes	yes	na	Monsanto research farm in Monmouth	IL	1	2001	Bhatti2005-1-2001	Table 5	"agronomic practices were typical of common agricultural practices in the corn growing region"	335	na	no	yes	split plot	na				V6 to R4	yes	0.25	4	no insecticide	na
669	14	Bhatti2005	Bhatti, M. A., J. Duan, G. P. Head, C. Jiang, M. J. McKee, T. E. Nickson, C. L. Pilcher, and C. D. Pilcher	2005	Environmental Entomology	34(5): 1325-1335	Field evaluation of the impact of corn rootworm (Coleoptera: Chrysomelidae)-protected Bt corn on ground-dwelling invertebrates	private	seed-chemical industry	yes	USA	North America	field	study	no	na	no	maize	maize	IMI	IMI	0.6	na	RX670	no	na	na	Monsanto research farm in Monmouth	IL	1	2001	Bhatti2005-1-2001	Table 5	"agronomic practices were typical of common agricultural practices in the corn growing region"	335	na	no	yes	split plot	na				V6 to R4	yes	0.25	4	no insecticide	na
672	14	Bhatti2005	Bhatti, M. A., J. Duan, G. P. Head, C. Jiang, M. J. McKee, T. E. Nickson, C. L. Pilcher, and C. D. Pilcher	2005	Environmental Entomology	34(5): 1325-1335	Field evaluation of the impact of corn rootworm (Coleoptera: Chrysomelidae)-protected Bt corn on ground-dwelling invertebrates	private	seed-chemical industry	yes	USA	North America	field	study	no	na	no	maize	maize	IMI	IMI	0.6	na	MON 863	yes	yes	na	Monsanto research farm in Monmouth	IL	1	2002	Bhatti2005-1-2002	Table 5	"agronomic practices were typical of common agricultural practices in the corn growing region"	335	na	no	yes	split plot	na				V6 to R4	yes	0.25	4	no insecticide	na
675	14	Bhatti2005	Bhatti, M. A., J. Duan, G. P. Head, C. Jiang, M. J. McKee, T. E. Nickson, C. L. Pilcher, and C. D. Pilcher	2005	Environmental Entomology	34(5): 1325-1335	Field evaluation of the impact of corn rootworm (Coleoptera: Chrysomelidae)-protected Bt corn on ground-dwelling invertebrates	private	seed-chemical industry	yes	USA	North America	field	study	no	na	no	maize	maize	IMI	IMI	0.6	na	RX670	no	na	na	Monsanto research farm in Monmouth	IL	1	2002	Bhatti2005-1-2002	Table 5	"agronomic practices were typical of common agricultural practices in the corn growing region"	335	na	no	yes	split plot	na				V6 to R4	yes	0.25	4	no insecticide	na
678	14	Bhatti2005	Bhatti, M. A., J. Duan, G. P. Head, C. Jiang, M. J. McKee, T. E. Nickson, C. L. Pilcher, and C. D. Pilcher	2005	Environmental Entomology	34(5): 1325-1335	Field evaluation of the impact of corn rootworm (Coleoptera: Chrysomelidae)-protected Bt corn on ground-dwelling invertebrates	private	seed-chemical industry	yes	USA	North America	field	study	no	na	no	maize	maize	IMI	IMI	0.6	na	MON 863	yes	yes	na	Monsanto research farm in Monmouth	IL	1	2000	Bhatti2005-1-2000	Table 5	"agronomic practices were typical of common agricultural practices in the corn growing region"	335	na	no	yes	split plot	na				V6 to R4	yes	0.25	4	no insecticide	na
681	14	Bhatti2005	Bhatti, M. A., J. Duan, G. P. Head, C. Jiang, M. J. McKee, T. E. Nickson, C. L. Pilcher, and C. D. Pilcher	2005	Environmental Entomology	34(5): 1325-1335	Field evaluation of the impact of corn rootworm (Coleoptera: Chrysomelidae)-protected Bt corn on ground-dwelling invertebrates	private	seed-chemical industry	yes	USA	North America	field	study	no	na	no	maize	maize	IMI	IMI	0.6	na	RX670	no	na	na	Monsanto research farm in Monmouth	IL	1	2000	Bhatti2005-1-2000	Table 5	"agronomic practices were typical of common agricultural practices in the corn growing region"	335	na	no	yes	split plot	na				V6 to R4	yes	0.25	4	no insecticide	na
684	14	Bhatti2005	Bhatti, M. A., J. Duan, G. P. Head, C. Jiang, M. J. McKee, T. E. Nickson, C. L. Pilcher, and C. D. Pilcher	2005	Environmental Entomology	34(5): 1325-1335	Field evaluation of the impact of corn rootworm (Coleoptera: Chrysomelidae)-protected Bt corn on ground-dwelling invertebrates	private	seed-chemical industry	yes	USA	North America	field	study	no	na	no	maize	maize	IMI	IMI	0.6	na	MON 863	yes	yes	na	Monsanto research farm in Monmouth	IL	1	2001	Bhatti2005-1-2001	Table 5	"agronomic practices were typical of common agricultural practices in the corn growing region"	335	na	no	yes	split plot	na				V6 to R4	yes	0.25	4	no insecticide	na
687	14	Bhatti2005	Bhatti, M. A., J. Duan, G. P. Head, C. Jiang, M. J. McKee, T. E. Nickson, C. L. Pilcher, and C. D. Pilcher	2005	Environmental Entomology	34(5): 1325-1335	Field evaluation of the impact of corn rootworm (Coleoptera: Chrysomelidae)-protected Bt corn on ground-dwelling invertebrates	private	seed-chemical industry	yes	USA	North America	field	study	no	na	no	maize	maize	IMI	IMI	0.6	na	RX670	no	na	na	Monsanto research farm in Monmouth	IL	1	2001	Bhatti2005-1-2001	Table 5	"agronomic practices were typical of common agricultural practices in the corn growing region"	335	na	no	yes	split plot	na				V6 to R4	yes	0.25	4	no insecticide	na
690	14	Bhatti2005	Bhatti, M. A., J. Duan, G. P. Head, C. Jiang, M. J. McKee, T. E. Nickson, C. L. Pilcher, and C. D. Pilcher	2005	Environmental Entomology	34(5): 1325-1335	Field evaluation of the impact of corn rootworm (Coleoptera: Chrysomelidae)-protected Bt corn on ground-dwelling invertebrates	private	seed-chemical industry	yes	USA	North America	field	study	no	na	no	maize	maize	IMI	IMI	0.6	na	MON 863	yes	yes	na	Monsanto research farm in Monmouth	IL	1	2002	Bhatti2005-1-2002	Table 5	"agronomic practices were typical of common agricultural practices in the corn growing region"	335	na	no	yes	split plot	na				V6 to R4	yes	0.25	4	no insecticide	na
693	14	Bhatti2005	Bhatti, M. A., J. Duan, G. P. Head, C. Jiang, M. J. McKee, T. E. Nickson, C. L. Pilcher, and C. D. Pilcher	2005	Environmental Entomology	34(5): 1325-1335	Field evaluation of the impact of corn rootworm (Coleoptera: Chrysomelidae)-protected Bt corn on ground-dwelling invertebrates	private	seed-chemical industry	yes	USA	North America	field	study	no	na	no	maize	maize	IMI	IMI	0.6	na	RX670	no	na	na	Monsanto research farm in Monmouth	IL	1	2002	Bhatti2005-1-2002	Table 5	"agronomic practices were typical of common agricultural practices in the corn growing region"	335	na	no	yes	split plot	na				V6 to R4	yes	0.25	4	no insecticide	na
696	14	Bhatti2005	Bhatti, M. A., J. Duan, G. P. Head, C. Jiang, M. J. McKee, T. E. Nickson, C. L. Pilcher, and C. D. Pilcher	2005	Environmental Entomology	34(5): 1325-1335	Field evaluation of the impact of corn rootworm (Coleoptera: Chrysomelidae)-protected Bt corn on ground-dwelling invertebrates	private	seed-chemical industry	yes	USA	North America	field	study	no	na	no	maize	maize	IMI	IMI	0.6	na	MON 863	yes	yes	na	Monsanto research farm in Monmouth	IL	1	2000	Bhatti2005-1-2000	Table 5	"agronomic practices were typical of common agricultural practices in the corn growing region"	335	na	no	yes	split plot	na				V6 to R4	yes	0.25	4	no insecticide	na
699	14	Bhatti2005	Bhatti, M. A., J. Duan, G. P. Head, C. Jiang, M. J. McKee, T. E. Nickson, C. L. Pilcher, and C. D. Pilcher	2005	Environmental Entomology	34(5): 1325-1335	Field evaluation of the impact of corn rootworm (Coleoptera: Chrysomelidae)-protected Bt corn on ground-dwelling invertebrates	private	seed-chemical industry	yes	USA	North America	field	study	no	na	no	maize	maize	IMI	IMI	0.6	na	RX670	no	na	na	Monsanto research farm in Monmouth	IL	1	2000	Bhatti2005-1-2000	Table 5	"agronomic practices were typical of common agricultural practices in the corn growing region"	335	na	no	yes	split plot	na				V6 to R4	yes	0.25	4	no insecticide	na
702	14	Bhatti2005	Bhatti, M. A., J. Duan, G. P. Head, C. Jiang, M. J. McKee, T. E. Nickson, C. L. Pilcher, and C. D. Pilcher	2005	Environmental Entomology	34(5): 1325-1335	Field evaluation of the impact of corn rootworm (Coleoptera: Chrysomelidae)-protected Bt corn on ground-dwelling invertebrates	private	seed-chemical industry	yes	USA	North America	field	study	no	na	no	maize	maize	IMI	IMI	0.6	na	MON 863	yes	yes	na	Monsanto research farm in Monmouth	IL	1	2001	Bhatti2005-1-2001	Table 5	"agronomic practices were typical of common agricultural practices in the corn growing region"	335	na	no	yes	split plot	na				V6 to R4	yes	0.25	4	no insecticide	na
705	14	Bhatti2005	Bhatti, M. A., J. Duan, G. P. Head, C. Jiang, M. J. McKee, T. E. Nickson, C. L. Pilcher, and C. D. Pilcher	2005	Environmental Entomology	34(5): 1325-1335	Field evaluation of the impact of corn rootworm (Coleoptera: Chrysomelidae)-protected Bt corn on ground-dwelling invertebrates	private	seed-chemical industry	yes	USA	North America	field	study	no	na	no	maize	maize	IMI	IMI	0.6	na	RX670	no	na	na	Monsanto research farm in Monmouth	IL	1	2001	Bhatti2005-1-2001	Table 5	"agronomic practices were typical of common agricultural practices in the corn growing region"	335	na	no	yes	split plot	na				V6 to R4	yes	0.25	4	no insecticide	na
708	14	Bhatti2005	Bhatti, M. A., J. Duan, G. P. Head, C. Jiang, M. J. McKee, T. E. Nickson, C. L. Pilcher, and C. D. Pilcher	2005	Environmental Entomology	34(5): 1325-1335	Field evaluation of the impact of corn rootworm (Coleoptera: Chrysomelidae)-protected Bt corn on ground-dwelling invertebrates	private	seed-chemical industry	yes	USA	North America	field	study	no	na	no	maize	maize	IMI	IMI	0.6	na	MON 863	yes	yes	na	Monsanto research farm in Monmouth	IL	1	2002	Bhatti2005-1-2002	Table 5	"agronomic practices were typical of common agricultural practices in the corn growing region"	335	na	no	yes	split plot	na				V6 to R4	yes	0.25	4	no insecticide	na
711	14	Bhatti2005	Bhatti, M. A., J. Duan, G. P. Head, C. Jiang, M. J. McKee, T. E. Nickson, C. L. Pilcher, and C. D. Pilcher	2005	Environmental Entomology	34(5): 1325-1335	Field evaluation of the impact of corn rootworm (Coleoptera: Chrysomelidae)-protected Bt corn on ground-dwelling invertebrates	private	seed-chemical industry	yes	USA	North America	field	study	no	na	no	maize	maize	IMI	IMI	0.6	na	RX670	no	na	na	Monsanto research farm in Monmouth	IL	1	2002	Bhatti2005-1-2002	Table 5	"agronomic practices were typical of common agricultural practices in the corn growing region"	335	na	no	yes	split plot	na				V6 to R4	yes	0.25	4	no insecticide	na
714	14	Bhatti2005	Bhatti, M. A., J. Duan, G. P. Head, C. Jiang, M. J. McKee, T. E. Nickson, C. L. Pilcher, and C. D. Pilcher	2005	Environmental Entomology	34(5): 1325-1335	Field evaluation of the impact of corn rootworm (Coleoptera: Chrysomelidae)-protected Bt corn on ground-dwelling invertebrates	private	seed-chemical industry	yes	USA	North America	field	study	no	na	no	maize	maize	IMI	IMI	0.6	na	MON 863	yes	yes	na	Monsanto research farm in Monmouth	IL	1	2000	Bhatti2005-1-2000	Table 5	"agronomic practices were typical of common agricultural practices in the corn growing region"	335	na	no	yes	split plot	na				V6 to R4	yes	0.25	4	no insecticide	na
717	14	Bhatti2005	Bhatti, M. A., J. Duan, G. P. Head, C. Jiang, M. J. McKee, T. E. Nickson, C. L. Pilcher, and C. D. Pilcher	2005	Environmental Entomology	34(5): 1325-1335	Field evaluation of the impact of corn rootworm (Coleoptera: Chrysomelidae)-protected Bt corn on ground-dwelling invertebrates	private	seed-chemical industry	yes	USA	North America	field	study	no	na	no	maize	maize	IMI	IMI	0.6	na	RX670	no	na	na	Monsanto research farm in Monmouth	IL	1	2000	Bhatti2005-1-2000	Table 5	"agronomic practices were typical of common agricultural practices in the corn growing region"	335	na	no	yes	split plot	na				V6 to R4	yes	0.25	4	no insecticide	na
720	14	Bhatti2005	Bhatti, M. A., J. Duan, G. P. Head, C. Jiang, M. J. McKee, T. E. Nickson, C. L. Pilcher, and C. D. Pilcher	2005	Environmental Entomology	34(5): 1325-1335	Field evaluation of the impact of corn rootworm (Coleoptera: Chrysomelidae)-protected Bt corn on ground-dwelling invertebrates	private	seed-chemical industry	yes	USA	North America	field	study	no	na	no	maize	maize	IMI	IMI	0.6	na	MON 863	yes	yes	na	Monsanto research farm in Monmouth	IL	1	2001	Bhatti2005-1-2001	Table 5	"agronomic practices were typical of common agricultural practices in the corn growing region"	335	na	no	yes	split plot	na				V6 to R4	yes	0.25	4	no insecticide	na
723	14	Bhatti2005	Bhatti, M. A., J. Duan, G. P. Head, C. Jiang, M. J. McKee, T. E. Nickson, C. L. Pilcher, and C. D. Pilcher	2005	Environmental Entomology	34(5): 1325-1335	Field evaluation of the impact of corn rootworm (Coleoptera: Chrysomelidae)-protected Bt corn on ground-dwelling invertebrates	private	seed-chemical industry	yes	USA	North America	field	study	no	na	no	maize	maize	IMI	IMI	0.6	na	RX670	no	na	na	Monsanto research farm in Monmouth	IL	1	2001	Bhatti2005-1-2001	Table 5	"agronomic practices were typical of common agricultural practices in the corn growing region"	335	na	no	yes	split plot	na				V6 to R4	yes	0.25	4	no insecticide	na
726	14	Bhatti2005	Bhatti, M. A., J. Duan, G. P. Head, C. Jiang, M. J. McKee, T. E. Nickson, C. L. Pilcher, and C. D. Pilcher	2005	Environmental Entomology	34(5): 1325-1335	Field evaluation of the impact of corn rootworm (Coleoptera: Chrysomelidae)-protected Bt corn on ground-dwelling invertebrates	private	seed-chemical industry	yes	USA	North America	field	study	no	na	no	maize	maize	IMI	IMI	0.6	na	MON 863	yes	yes	na	Monsanto research farm in Monmouth	IL	1	2002	Bhatti2005-1-2002	Table 5	"agronomic practices were typical of common agricultural practices in the corn growing region"	335	na	no	yes	split plot	na				V6 to R4	yes	0.25	4	no insecticide	na
729	14	Bhatti2005	Bhatti, M. A., J. Duan, G. P. Head, C. Jiang, M. J. McKee, T. E. Nickson, C. L. Pilcher, and C. D. Pilcher	2005	Environmental Entomology	34(5): 1325-1335	Field evaluation of the impact of corn rootworm (Coleoptera: Chrysomelidae)-protected Bt corn on ground-dwelling invertebrates	private	seed-chemical industry	yes	USA	North America	field	study	no	na	no	maize	maize	IMI	IMI	0.6	na	RX670	no	na	na	Monsanto research farm in Monmouth	IL	1	2002	Bhatti2005-1-2002	Table 5	"agronomic practices were typical of common agricultural practices in the corn growing region"	335	na	no	yes	split plot	na				V6 to R4	yes	0.25	4	no insecticide	na
732	15	Bhatti2005	Bhatti, M. A., J. Duan, G. P. Head, C. Jiang, M. J. McKee, T. E. Nickson, C. L. Pilcher, and C. D. Pilcher	2005	Environmental Entomology	34(5): 1336-1345	Field evaluation of the impact of corn rootworm (Coleoptera: Chrysomelidae)-protected Bt corn on foliage-dwelling arthropods	private	seed-chemical industry	yes	USA	North America	field	study	no	na	no	maize	maize	IMI	IMI	0.6	na	MON 863	yes	yes	na	Monsanto research farm in Monmouth	IL	1	2000	Bhatti2005-1-2000	Table 2	"agronomic practices were typical of common agricultural practices in the corn growing region"	335	na	no	yes	split plot	na				V6 to R4	yes	0.2	4	no insecticide	na
735	15	Bhatti2005	Bhatti, M. A., J. Duan, G. P. Head, C. Jiang, M. J. McKee, T. E. Nickson, C. L. Pilcher, and C. D. Pilcher	2005	Environmental Entomology	34(5): 1336-1345	Field evaluation of the impact of corn rootworm (Coleoptera: Chrysomelidae)-protected Bt corn on foliage-dwelling arthropods	private	seed-chemical industry	yes	USA	North America	field	study	no	na	no	maize	maize	IMI	IMI	0.6	na	RX670	no	na	na	Monsanto research farm in Monmouth	IL	1	2000	Bhatti2005-1-2000	Table 2	"agronomic practices were typical of common agricultural practices in the corn growing region"	335	na	no	yes	split plot	na				V6 to R4	yes	0.2	4	no insecticide	na
738	15	Bhatti2005	Bhatti, M. A., J. Duan, G. P. Head, C. Jiang, M. J. McKee, T. E. Nickson, C. L. Pilcher, and C. D. Pilcher	2005	Environmental Entomology	34(5): 1336-1345	Field evaluation of the impact of corn rootworm (Coleoptera: Chrysomelidae)-protected Bt corn on foliage-dwelling arthropods	private	seed-chemical industry	yes	USA	North America	field	study	no	na	no	maize	maize	IMI	IMI	0.6	na	MON 863	yes	yes	na	Monsanto research farm in Monmouth	IL	1	2001	Bhatti2005-1-2001	Table 2	"agronomic practices were typical of common agricultural practices in the corn growing region"	335	na	no	yes	split plot	na				V6 to R4	yes	0.2	4	no insecticide	na
741	15	Bhatti2005	Bhatti, M. A., J. Duan, G. P. Head, C. Jiang, M. J. McKee, T. E. Nickson, C. L. Pilcher, and C. D. Pilcher	2005	Environmental Entomology	34(5): 1336-1345	Field evaluation of the impact of corn rootworm (Coleoptera: Chrysomelidae)-protected Bt corn on foliage-dwelling arthropods	private	seed-chemical industry	yes	USA	North America	field	study	no	na	no	maize	maize	IMI	IMI	0.6	na	RX670	no	na	na	Monsanto research farm in Monmouth	IL	1	2001	Bhatti2005-1-2001	Table 2	"agronomic practices were typical of common agricultural practices in the corn growing region"	335	na	no	yes	split plot	na				V6 to R4	yes	0.2	4	no insecticide	na
744	15	Bhatti2005	Bhatti, M. A., J. Duan, G. P. Head, C. Jiang, M. J. McKee, T. E. Nickson, C. L. Pilcher, and C. D. Pilcher	2005	Environmental Entomology	34(5): 1336-1345	Field evaluation of the impact of corn rootworm (Coleoptera: Chrysomelidae)-protected Bt corn on foliage-dwelling arthropods	private	seed-chemical industry	yes	USA	North America	field	study	no	na	no	maize	maize	IMI	IMI	0.6	na	MON 863	yes	yes	na	Monsanto research farm in Monmouth	IL	1	2002	Bhatti2005-1-2002	Table 2	"agronomic practices were typical of common agricultural practices in the corn growing region"	335	na	no	yes	split plot	na				V6 to R4	yes	0.2	4	no insecticide	na
747	15	Bhatti2005	Bhatti, M. A., J. Duan, G. P. Head, C. Jiang, M. J. McKee, T. E. Nickson, C. L. Pilcher, and C. D. Pilcher	2005	Environmental Entomology	34(5): 1336-1345	Field evaluation of the impact of corn rootworm (Coleoptera: Chrysomelidae)-protected Bt corn on foliage-dwelling arthropods	private	seed-chemical industry	yes	USA	North America	field	study	no	na	no	maize	maize	IMI	IMI	0.6	na	RX670	no	na	na	Monsanto research farm in Monmouth	IL	1	2002	Bhatti2005-1-2002	Table 2	"agronomic practices were typical of common agricultural practices in the corn growing region"	335	na	no	yes	split plot	na				V6 to R4	yes	0.2	4	no insecticide	na
750	15	Bhatti2005	Bhatti, M. A., J. Duan, G. P. Head, C. Jiang, M. J. McKee, T. E. Nickson, C. L. Pilcher, and C. D. Pilcher	2005	Environmental Entomology	34(5): 1336-1345	Field evaluation of the impact of corn rootworm (Coleoptera: Chrysomelidae)-protected Bt corn on foliage-dwelling arthropods	private	seed-chemical industry	yes	USA	North America	field	study	no	na	no	maize	maize	IMI	IMI	0.6	na	MON 863	yes	yes	na	Monsanto research farm in Monmouth	IL	1	2000	Bhatti2005-1-2000	Table 2	"agronomic practices were typical of common agricultural practices in the corn growing region"	335	na	no	yes	split plot	na				V6 to R4	yes	0.2	4	no insecticide	na
753	15	Bhatti2005	Bhatti, M. A., J. Duan, G. P. Head, C. Jiang, M. J. McKee, T. E. Nickson, C. L. Pilcher, and C. D. Pilcher	2005	Environmental Entomology	34(5): 1336-1345	Field evaluation of the impact of corn rootworm (Coleoptera: Chrysomelidae)-protected Bt corn on foliage-dwelling arthropods	private	seed-chemical industry	yes	USA	North America	field	study	no	na	no	maize	maize	IMI	IMI	0.6	na	RX670	no	na	na	Monsanto research farm in Monmouth	IL	1	2000	Bhatti2005-1-2000	Table 2	"agronomic practices were typical of common agricultural practices in the corn growing region"	335	na	no	yes	split plot	na				V6 to R4	yes	0.2	4	no insecticide	na
756	15	Bhatti2005	Bhatti, M. A., J. Duan, G. P. Head, C. Jiang, M. J. McKee, T. E. Nickson, C. L. Pilcher, and C. D. Pilcher	2005	Environmental Entomology	34(5): 1336-1345	Field evaluation of the impact of corn rootworm (Coleoptera: Chrysomelidae)-protected Bt corn on foliage-dwelling arthropods	private	seed-chemical industry	yes	USA	North America	field	study	no	na	no	maize	maize	IMI	IMI	0.6	na	MON 863	yes	yes	na	Monsanto research farm in Monmouth	IL	1	2001	Bhatti2005-1-2001	Table 2	"agronomic practices were typical of common agricultural practices in the corn growing region"	335	na	no	yes	split plot	na				V6 to R4	yes	0.2	4	no insecticide	na
759	15	Bhatti2005	Bhatti, M. A., J. Duan, G. P. Head, C. Jiang, M. J. McKee, T. E. Nickson, C. L. Pilcher, and C. D. Pilcher	2005	Environmental Entomology	34(5): 1336-1345	Field evaluation of the impact of corn rootworm (Coleoptera: Chrysomelidae)-protected Bt corn on foliage-dwelling arthropods	private	seed-chemical industry	yes	USA	North America	field	study	no	na	no	maize	maize	IMI	IMI	0.6	na	RX670	no	na	na	Monsanto research farm in Monmouth	IL	1	2001	Bhatti2005-1-2001	Table 2	"agronomic practices were typical of common agricultural practices in the corn growing region"	335	na	no	yes	split plot	na				V6 to R4	yes	0.2	4	no insecticide	na
762	15	Bhatti2005	Bhatti, M. A., J. Duan, G. P. Head, C. Jiang, M. J. McKee, T. E. Nickson, C. L. Pilcher, and C. D. Pilcher	2005	Environmental Entomology	34(5): 1336-1345	Field evaluation of the impact of corn rootworm (Coleoptera: Chrysomelidae)-protected Bt corn on foliage-dwelling arthropods	private	seed-chemical industry	yes	USA	North America	field	study	no	na	no	maize	maize	IMI	IMI	0.6	na	MON 863	yes	yes	na	Monsanto research farm in Monmouth	IL	1	2002	Bhatti2005-1-2002	Table 2	"agronomic practices were typical of common agricultural practices in the corn growing region"	335	na	no	yes	split plot	na				V6 to R4	yes	0.2	4	no insecticide	na
765	15	Bhatti2005	Bhatti, M. A., J. Duan, G. P. Head, C. Jiang, M. J. McKee, T. E. Nickson, C. L. Pilcher, and C. D. Pilcher	2005	Environmental Entomology	34(5): 1336-1345	Field evaluation of the impact of corn rootworm (Coleoptera: Chrysomelidae)-protected Bt corn on foliage-dwelling arthropods	private	seed-chemical industry	yes	USA	North America	field	study	no	na	no	maize	maize	IMI	IMI	0.6	na	RX670	no	na	na	Monsanto research farm in Monmouth	IL	1	2002	Bhatti2005-1-2002	Table 2	"agronomic practices were typical of common agricultural practices in the corn growing region"	335	na	no	yes	split plot	na				V6 to R4	yes	0.2	4	no insecticide	na
768	15	Bhatti2005	Bhatti, M. A., J. Duan, G. P. Head, C. Jiang, M. J. McKee, T. E. Nickson, C. L. Pilcher, and C. D. Pilcher	2005	Environmental Entomology	34(5): 1336-1345	Field evaluation of the impact of corn rootworm (Coleoptera: Chrysomelidae)-protected Bt corn on foliage-dwelling arthropods	private	seed-chemical industry	yes	USA	North America	field	study	no	na	no	maize	maize	IMI	IMI	0.6	na	MON 863	yes	yes	na	Monsanto research farm in Monmouth	IL	1	2000	Bhatti2005-1-2000	Table 2	"agronomic practices were typical of common agricultural practices in the corn growing region"	335	na	no	yes	split plot	na				V6 to R4	yes	0.2	4	no insecticide	na
771	15	Bhatti2005	Bhatti, M. A., J. Duan, G. P. Head, C. Jiang, M. J. McKee, T. E. Nickson, C. L. Pilcher, and C. D. Pilcher	2005	Environmental Entomology	34(5): 1336-1345	Field evaluation of the impact of corn rootworm (Coleoptera: Chrysomelidae)-protected Bt corn on foliage-dwelling arthropods	private	seed-chemical industry	yes	USA	North America	field	study	no	na	no	maize	maize	IMI	IMI	0.6	na	RX670	no	na	na	Monsanto research farm in Monmouth	IL	1	2000	Bhatti2005-1-2000	Table 2	"agronomic practices were typical of common agricultural practices in the corn growing region"	335	na	no	yes	split plot	na				V6 to R4	yes	0.2	4	no insecticide	na
774	15	Bhatti2005	Bhatti, M. A., J. Duan, G. P. Head, C. Jiang, M. J. McKee, T. E. Nickson, C. L. Pilcher, and C. D. Pilcher	2005	Environmental Entomology	34(5): 1336-1345	Field evaluation of the impact of corn rootworm (Coleoptera: Chrysomelidae)-protected Bt corn on foliage-dwelling arthropods	private	seed-chemical industry	yes	USA	North America	field	study	no	na	no	maize	maize	IMI	IMI	0.6	na	MON 863	yes	yes	na	Monsanto research farm in Monmouth	IL	1	2001	Bhatti2005-1-2001	Table 2	"agronomic practices were typical of common agricultural practices in the corn growing region"	335	na	no	yes	split plot	na				V6 to R4	yes	0.2	4	no insecticide	na
777	15	Bhatti2005	Bhatti, M. A., J. Duan, G. P. Head, C. Jiang, M. J. McKee, T. E. Nickson, C. L. Pilcher, and C. D. Pilcher	2005	Environmental Entomology	34(5): 1336-1345	Field evaluation of the impact of corn rootworm (Coleoptera: Chrysomelidae)-protected Bt corn on foliage-dwelling arthropods	private	seed-chemical industry	yes	USA	North America	field	study	no	na	no	maize	maize	IMI	IMI	0.6	na	RX670	no	na	na	Monsanto research farm in Monmouth	IL	1	2001	Bhatti2005-1-2001	Table 2	"agronomic practices were typical of common agricultural practices in the corn growing region"	335	na	no	yes	split plot	na				V6 to R4	yes	0.2	4	no insecticide	na
780	15	Bhatti2005	Bhatti, M. A., J. Duan, G. P. Head, C. Jiang, M. J. McKee, T. E. Nickson, C. L. Pilcher, and C. D. Pilcher	2005	Environmental Entomology	34(5): 1336-1345	Field evaluation of the impact of corn rootworm (Coleoptera: Chrysomelidae)-protected Bt corn on foliage-dwelling arthropods	private	seed-chemical industry	yes	USA	North America	field	study	no	na	no	maize	maize	IMI	IMI	0.6	na	MON 863	yes	yes	na	Monsanto research farm in Monmouth	IL	1	2002	Bhatti2005-1-2002	Table 2	"agronomic practices were typical of common agricultural practices in the corn growing region"	335	na	no	yes	split plot	na				V6 to R4	yes	0.2	4	no insecticide	na
783	15	Bhatti2005	Bhatti, M. A., J. Duan, G. P. Head, C. Jiang, M. J. McKee, T. E. Nickson, C. L. Pilcher, and C. D. Pilcher	2005	Environmental Entomology	34(5): 1336-1345	Field evaluation of the impact of corn rootworm (Coleoptera: Chrysomelidae)-protected Bt corn on foliage-dwelling arthropods	private	seed-chemical industry	yes	USA	North America	field	study	no	na	no	maize	maize	IMI	IMI	0.6	na	RX670	no	na	na	Monsanto research farm in Monmouth	IL	1	2002	Bhatti2005-1-2002	Table 2	"agronomic practices were typical of common agricultural practices in the corn growing region"	335	na	no	yes	split plot	na				V6 to R4	yes	0.2	4	no insecticide	na
786	15	Bhatti2005	Bhatti, M. A., J. Duan, G. P. Head, C. Jiang, M. J. McKee, T. E. Nickson, C. L. Pilcher, and C. D. Pilcher	2005	Environmental Entomology	34(5): 1336-1345	Field evaluation of the impact of corn rootworm (Coleoptera: Chrysomelidae)-protected Bt corn on foliage-dwelling arthropods	private	seed-chemical industry	yes	USA	North America	field	study	no	na	no	maize	maize	IMI	IMI	0.6	na	MON 863	yes	yes	na	Monsanto research farm in Monmouth	IL	1	2000	Bhatti2005-1-2000	Table 2	"agronomic practices were typical of common agricultural practices in the corn growing region"	335	na	no	yes	split plot	na				V6 to R4	yes	0.2	4	no insecticide	na
789	15	Bhatti2005	Bhatti, M. A., J. Duan, G. P. Head, C. Jiang, M. J. McKee, T. E. Nickson, C. L. Pilcher, and C. D. Pilcher	2005	Environmental Entomology	34(5): 1336-1345	Field evaluation of the impact of corn rootworm (Coleoptera: Chrysomelidae)-protected Bt corn on foliage-dwelling arthropods	private	seed-chemical industry	yes	USA	North America	field	study	no	na	no	maize	maize	IMI	IMI	0.6	na	RX670	no	na	na	Monsanto research farm in Monmouth	IL	1	2000	Bhatti2005-1-2000	Table 2	"agronomic practices were typical of common agricultural practices in the corn growing region"	335	na	no	yes	split plot	na				V6 to R4	yes	0.2	4	no insecticide	na
792	15	Bhatti2005	Bhatti, M. A., J. Duan, G. P. Head, C. Jiang, M. J. McKee, T. E. Nickson, C. L. Pilcher, and C. D. Pilcher	2005	Environmental Entomology	34(5): 1336-1345	Field evaluation of the impact of corn rootworm (Coleoptera: Chrysomelidae)-protected Bt corn on foliage-dwelling arthropods	private	seed-chemical industry	yes	USA	North America	field	study	no	na	no	maize	maize	IMI	IMI	0.6	na	MON 863	yes	yes	na	Monsanto research farm in Monmouth	IL	1	2001	Bhatti2005-1-2001	Table 2	"agronomic practices were typical of common agricultural practices in the corn growing region"	335	na	no	yes	split plot	na				V6 to R4	yes	0.2	4	no insecticide	na
795	15	Bhatti2005	Bhatti, M. A., J. Duan, G. P. Head, C. Jiang, M. J. McKee, T. E. Nickson, C. L. Pilcher, and C. D. Pilcher	2005	Environmental Entomology	34(5): 1336-1345	Field evaluation of the impact of corn rootworm (Coleoptera: Chrysomelidae)-protected Bt corn on foliage-dwelling arthropods	private	seed-chemical industry	yes	USA	North America	field	study	no	na	no	maize	maize	IMI	IMI	0.6	na	RX670	no	na	na	Monsanto research farm in Monmouth	IL	1	2001	Bhatti2005-1-2001	Table 2	"agronomic practices were typical of common agricultural practices in the corn growing region"	335	na	no	yes	split plot	na				V6 to R4	yes	0.2	4	no insecticide	na
798	15	Bhatti2005	Bhatti, M. A., J. Duan, G. P. Head, C. Jiang, M. J. McKee, T. E. Nickson, C. L. Pilcher, and C. D. Pilcher	2005	Environmental Entomology	34(5): 1336-1345	Field evaluation of the impact of corn rootworm (Coleoptera: Chrysomelidae)-protected Bt corn on foliage-dwelling arthropods	private	seed-chemical industry	yes	USA	North America	field	study	no	na	no	maize	maize	IMI	IMI	0.6	na	MON 863	yes	yes	na	Monsanto research farm in Monmouth	IL	1	2002	Bhatti2005-1-2002	Table 2	"agronomic practices were typical of common agricultural practices in the corn growing region"	335	na	no	yes	split plot	na				V6 to R4	yes	0.2	4	no insecticide	na
801	15	Bhatti2005	Bhatti, M. A., J. Duan, G. P. Head, C. Jiang, M. J. McKee, T. E. Nickson, C. L. Pilcher, and C. D. Pilcher	2005	Environmental Entomology	34(5): 1336-1345	Field evaluation of the impact of corn rootworm (Coleoptera: Chrysomelidae)-protected Bt corn on foliage-dwelling arthropods	private	seed-chemical industry	yes	USA	North America	field	study	no	na	no	maize	maize	IMI	IMI	0.6	na	RX670	no	na	na	Monsanto research farm in Monmouth	IL	1	2002	Bhatti2005-1-2002	Table 2	"agronomic practices were typical of common agricultural practices in the corn growing region"	335	na	no	yes	split plot	na				V6 to R4	yes	0.2	4	no insecticide	na
804	15	Bhatti2005	Bhatti, M. A., J. Duan, G. P. Head, C. Jiang, M. J. McKee, T. E. Nickson, C. L. Pilcher, and C. D. Pilcher	2005	Environmental Entomology	34(5): 1336-1345	Field evaluation of the impact of corn rootworm (Coleoptera: Chrysomelidae)-protected Bt corn on foliage-dwelling arthropods	private	seed-chemical industry	yes	USA	North America	field	study	no	na	no	maize	maize	IMI	IMI	0.6	na	MON 863	yes	yes	na	Monsanto research farm in Monmouth	IL	1	2000	Bhatti2005-1-2000	Table 2	"agronomic practices were typical of common agricultural practices in the corn growing region"	335	na	no	yes	split plot	na				V6 to R4	yes	0.2	4	no insecticide	na
807	15	Bhatti2005	Bhatti, M. A., J. Duan, G. P. Head, C. Jiang, M. J. McKee, T. E. Nickson, C. L. Pilcher, and C. D. Pilcher	2005	Environmental Entomology	34(5): 1336-1345	Field evaluation of the impact of corn rootworm (Coleoptera: Chrysomelidae)-protected Bt corn on foliage-dwelling arthropods	private	seed-chemical industry	yes	USA	North America	field	study	no	na	no	maize	maize	IMI	IMI	0.6	na	RX670	no	na	na	Monsanto research farm in Monmouth	IL	1	2000	Bhatti2005-1-2000	Table 2	"agronomic practices were typical of common agricultural practices in the corn growing region"	335	na	no	yes	split plot	na				V6 to R4	yes	0.2	4	no insecticide	na
810	15	Bhatti2005	Bhatti, M. A., J. Duan, G. P. Head, C. Jiang, M. J. McKee, T. E. Nickson, C. L. Pilcher, and C. D. Pilcher	2005	Environmental Entomology	34(5): 1336-1345	Field evaluation of the impact of corn rootworm (Coleoptera: Chrysomelidae)-protected Bt corn on foliage-dwelling arthropods	private	seed-chemical industry	yes	USA	North America	field	study	no	na	no	maize	maize	IMI	IMI	0.6	na	MON 863	yes	yes	na	Monsanto research farm in Monmouth	IL	1	2001	Bhatti2005-1-2001	Table 2	"agronomic practices were typical of common agricultural practices in the corn growing region"	335	na	no	yes	split plot	na				V6 to R4	yes	0.2	4	no insecticide	na
813	15	Bhatti2005	Bhatti, M. A., J. Duan, G. P. Head, C. Jiang, M. J. McKee, T. E. Nickson, C. L. Pilcher, and C. D. Pilcher	2005	Environmental Entomology	34(5): 1336-1345	Field evaluation of the impact of corn rootworm (Coleoptera: Chrysomelidae)-protected Bt corn on foliage-dwelling arthropods	private	seed-chemical industry	yes	USA	North America	field	study	no	na	no	maize	maize	IMI	IMI	0.6	na	RX670	no	na	na	Monsanto research farm in Monmouth	IL	1	2001	Bhatti2005-1-2001	Table 2	"agronomic practices were typical of common agricultural practices in the corn growing region"	335	na	no	yes	split plot	na				V6 to R4	yes	0.2	4	no insecticide	na
816	15	Bhatti2005	Bhatti, M. A., J. Duan, G. P. Head, C. Jiang, M. J. McKee, T. E. Nickson, C. L. Pilcher, and C. D. Pilcher	2005	Environmental Entomology	34(5): 1336-1345	Field evaluation of the impact of corn rootworm (Coleoptera: Chrysomelidae)-protected Bt corn on foliage-dwelling arthropods	private	seed-chemical industry	yes	USA	North America	field	study	no	na	no	maize	maize	IMI	IMI	0.6	na	MON 863	yes	yes	na	Monsanto research farm in Monmouth	IL	1	2002	Bhatti2005-1-2002	Table 2	"agronomic practices were typical of common agricultural practices in the corn growing region"	335	na	no	yes	split plot	na				V6 to R4	yes	0.2	4	no insecticide	na
819	15	Bhatti2005	Bhatti, M. A., J. Duan, G. P. Head, C. Jiang, M. J. McKee, T. E. Nickson, C. L. Pilcher, and C. D. Pilcher	2005	Environmental Entomology	34(5): 1336-1345	Field evaluation of the impact of corn rootworm (Coleoptera: Chrysomelidae)-protected Bt corn on foliage-dwelling arthropods	private	seed-chemical industry	yes	USA	North America	field	study	no	na	no	maize	maize	IMI	IMI	0.6	na	RX670	no	na	na	Monsanto research farm in Monmouth	IL	1	2002	Bhatti2005-1-2002	Table 2	"agronomic practices were typical of common agricultural practices in the corn growing region"	335	na	no	yes	split plot	na				V6 to R4	yes	0.2	4	no insecticide	na
822	15	Bhatti2005	Bhatti, M. A., J. Duan, G. P. Head, C. Jiang, M. J. McKee, T. E. Nickson, C. L. Pilcher, and C. D. Pilcher	2005	Environmental Entomology	34(5): 1336-1345	Field evaluation of the impact of corn rootworm (Coleoptera: Chrysomelidae)-protected Bt corn on foliage-dwelling arthropods	private	seed-chemical industry	yes	USA	North America	field	study	no	na	no	maize	maize	IMI	IMI	0.6	na	MON 863	yes	yes	na	Monsanto research farm in Monmouth	IL	1	2000	Bhatti2005-1-2000	Table 2	"agronomic practices were typical of common agricultural practices in the corn growing region"	335	na	no	yes	split plot	na				V6 to R4	yes	0.2	4	no insecticide	na
825	15	Bhatti2005	Bhatti, M. A., J. Duan, G. P. Head, C. Jiang, M. J. McKee, T. E. Nickson, C. L. Pilcher, and C. D. Pilcher	2005	Environmental Entomology	34(5): 1336-1345	Field evaluation of the impact of corn rootworm (Coleoptera: Chrysomelidae)-protected Bt corn on foliage-dwelling arthropods	private	seed-chemical industry	yes	USA	North America	field	study	no	na	no	maize	maize	IMI	IMI	0.6	na	RX670	no	na	na	Monsanto research farm in Monmouth	IL	1	2000	Bhatti2005-1-2000	Table 2	"agronomic practices were typical of common agricultural practices in the corn growing region"	335	na	no	yes	split plot	na				V6 to R4	yes	0.2	4	no insecticide	na
828	15	Bhatti2005	Bhatti, M. A., J. Duan, G. P. Head, C. Jiang, M. J. McKee, T. E. Nickson, C. L. Pilcher, and C. D. Pilcher	2005	Environmental Entomology	34(5): 1336-1345	Field evaluation of the impact of corn rootworm (Coleoptera: Chrysomelidae)-protected Bt corn on foliage-dwelling arthropods	private	seed-chemical industry	yes	USA	North America	field	study	no	na	no	maize	maize	IMI	IMI	0.6	na	MON 863	yes	yes	na	Monsanto research farm in Monmouth	IL	1	2001	Bhatti2005-1-2001	Table 2	"agronomic practices were typical of common agricultural practices in the corn growing region"	335	na	no	yes	split plot	na				V6 to R4	yes	0.2	4	no insecticide	na
831	15	Bhatti2005	Bhatti, M. A., J. Duan, G. P. Head, C. Jiang, M. J. McKee, T. E. Nickson, C. L. Pilcher, and C. D. Pilcher	2005	Environmental Entomology	34(5): 1336-1345	Field evaluation of the impact of corn rootworm (Coleoptera: Chrysomelidae)-protected Bt corn on foliage-dwelling arthropods	private	seed-chemical industry	yes	USA	North America	field	study	no	na	no	maize	maize	IMI	IMI	0.6	na	RX670	no	na	na	Monsanto research farm in Monmouth	IL	1	2001	Bhatti2005-1-2001	Table 2	"agronomic practices were typical of common agricultural practices in the corn growing region"	335	na	no	yes	split plot	na				V6 to R4	yes	0.2	4	no insecticide	na
834	15	Bhatti2005	Bhatti, M. A., J. Duan, G. P. Head, C. Jiang, M. J. McKee, T. E. Nickson, C. L. Pilcher, and C. D. Pilcher	2005	Environmental Entomology	34(5): 1336-1345	Field evaluation of the impact of corn rootworm (Coleoptera: Chrysomelidae)-protected Bt corn on foliage-dwelling arthropods	private	seed-chemical industry	yes	USA	North America	field	study	no	na	no	maize	maize	IMI	IMI	0.6	na	MON 863	yes	yes	na	Monsanto research farm in Monmouth	IL	1	2002	Bhatti2005-1-2002	Table 2	"agronomic practices were typical of common agricultural practices in the corn growing region"	335	na	no	yes	split plot	na				V6 to R4	yes	0.2	4	no insecticide	na
837	15	Bhatti2005	Bhatti, M. A., J. Duan, G. P. Head, C. Jiang, M. J. McKee, T. E. Nickson, C. L. Pilcher, and C. D. Pilcher	2005	Environmental Entomology	34(5): 1336-1345	Field evaluation of the impact of corn rootworm (Coleoptera: Chrysomelidae)-protected Bt corn on foliage-dwelling arthropods	private	seed-chemical industry	yes	USA	North America	field	study	no	na	no	maize	maize	IMI	IMI	0.6	na	RX670	no	na	na	Monsanto research farm in Monmouth	IL	1	2002	Bhatti2005-1-2002	Table 2	"agronomic practices were typical of common agricultural practices in the corn growing region"	335	na	no	yes	split plot	na				V6 to R4	yes	0.2	4	no insecticide	na
840	15	Bhatti2005	Bhatti, M. A., J. Duan, G. P. Head, C. Jiang, M. J. McKee, T. E. Nickson, C. L. Pilcher, and C. D. Pilcher	2005	Environmental Entomology	34(5): 1336-1345	Field evaluation of the impact of corn rootworm (Coleoptera: Chrysomelidae)-protected Bt corn on foliage-dwelling arthropods	private	seed-chemical industry	yes	USA	North America	field	study	no	na	no	maize	maize	IMI	IMI	0.6	na	MON 863	yes	yes	na	Monsanto research farm in Monmouth	IL	1	2000	Bhatti2005-1-2000	Table 2	"agronomic practices were typical of common agricultural practices in the corn growing region"	335	na	no	yes	split plot	na				V6 to R4	yes	0.2	4	no insecticide	na
843	15	Bhatti2005	Bhatti, M. A., J. Duan, G. P. Head, C. Jiang, M. J. McKee, T. E. Nickson, C. L. Pilcher, and C. D. Pilcher	2005	Environmental Entomology	34(5): 1336-1345	Field evaluation of the impact of corn rootworm (Coleoptera: Chrysomelidae)-protected Bt corn on foliage-dwelling arthropods	private	seed-chemical industry	yes	USA	North America	field	study	no	na	no	maize	maize	IMI	IMI	0.6	na	RX670	no	na	na	Monsanto research farm in Monmouth	IL	1	2000	Bhatti2005-1-2000	Table 2	"agronomic practices were typical of common agricultural practices in the corn growing region"	335	na	no	yes	split plot	na				V6 to R4	yes	0.2	4	no insecticide	na
846	15	Bhatti2005	Bhatti, M. A., J. Duan, G. P. Head, C. Jiang, M. J. McKee, T. E. Nickson, C. L. Pilcher, and C. D. Pilcher	2005	Environmental Entomology	34(5): 1336-1345	Field evaluation of the impact of corn rootworm (Coleoptera: Chrysomelidae)-protected Bt corn on foliage-dwelling arthropods	private	seed-chemical industry	yes	USA	North America	field	study	no	na	no	maize	maize	IMI	IMI	0.6	na	MON 863	yes	yes	na	Monsanto research farm in Monmouth	IL	1	2001	Bhatti2005-1-2001	Table 2	"agronomic practices were typical of common agricultural practices in the corn growing region"	335	na	no	yes	split plot	na				V6 to R4	yes	0.2	4	no insecticide	na
849	15	Bhatti2005	Bhatti, M. A., J. Duan, G. P. Head, C. Jiang, M. J. McKee, T. E. Nickson, C. L. Pilcher, and C. D. Pilcher	2005	Environmental Entomology	34(5): 1336-1345	Field evaluation of the impact of corn rootworm (Coleoptera: Chrysomelidae)-protected Bt corn on foliage-dwelling arthropods	private	seed-chemical industry	yes	USA	North America	field	study	no	na	no	maize	maize	IMI	IMI	0.6	na	RX670	no	na	na	Monsanto research farm in Monmouth	IL	1	2001	Bhatti2005-1-2001	Table 2	"agronomic practices were typical of common agricultural practices in the corn growing region"	335	na	no	yes	split plot	na				V6 to R4	yes	0.2	4	no insecticide	na
852	15	Bhatti2005	Bhatti, M. A., J. Duan, G. P. Head, C. Jiang, M. J. McKee, T. E. Nickson, C. L. Pilcher, and C. D. Pilcher	2005	Environmental Entomology	34(5): 1336-1345	Field evaluation of the impact of corn rootworm (Coleoptera: Chrysomelidae)-protected Bt corn on foliage-dwelling arthropods	private	seed-chemical industry	yes	USA	North America	field	study	no	na	no	maize	maize	IMI	IMI	0.6	na	MON 863	yes	yes	na	Monsanto research farm in Monmouth	IL	1	2002	Bhatti2005-1-2002	Table 2	"agronomic practices were typical of common agricultural practices in the corn growing region"	335	na	no	yes	split plot	na				V6 to R4	yes	0.2	4	no insecticide	na
855	15	Bhatti2005	Bhatti, M. A., J. Duan, G. P. Head, C. Jiang, M. J. McKee, T. E. Nickson, C. L. Pilcher, and C. D. Pilcher	2005	Environmental Entomology	34(5): 1336-1345	Field evaluation of the impact of corn rootworm (Coleoptera: Chrysomelidae)-protected Bt corn on foliage-dwelling arthropods	private	seed-chemical industry	yes	USA	North America	field	study	no	na	no	maize	maize	IMI	IMI	0.6	na	RX670	no	na	na	Monsanto research farm in Monmouth	IL	1	2002	Bhatti2005-1-2002	Table 2	"agronomic practices were typical of common agricultural practices in the corn growing region"	335	na	no	yes	split plot	na				V6 to R4	yes	0.2	4	no insecticide	na
858	15	Bhatti2005	Bhatti, M. A., J. Duan, G. P. Head, C. Jiang, M. J. McKee, T. E. Nickson, C. L. Pilcher, and C. D. Pilcher	2005	Environmental Entomology	34(5): 1336-1345	Field evaluation of the impact of corn rootworm (Coleoptera: Chrysomelidae)-protected Bt corn on foliage-dwelling arthropods	private	seed-chemical industry	yes	USA	North America	field	study	no	na	no	maize	maize	IMI	IMI	0.6	na	MON 863	yes	yes	na	Monsanto research farm in Monmouth	IL	1	2000	Bhatti2005-1-2000	Table 2	"agronomic practices were typical of common agricultural practices in the corn growing region"	335	na	no	yes	split plot	na				V6 to R4	yes	0.2	4	no insecticide	na
861	15	Bhatti2005	Bhatti, M. A., J. Duan, G. P. Head, C. Jiang, M. J. McKee, T. E. Nickson, C. L. Pilcher, and C. D. Pilcher	2005	Environmental Entomology	34(5): 1336-1345	Field evaluation of the impact of corn rootworm (Coleoptera: Chrysomelidae)-protected Bt corn on foliage-dwelling arthropods	private	seed-chemical industry	yes	USA	North America	field	study	no	na	no	maize	maize	IMI	IMI	0.6	na	RX670	no	na	na	Monsanto research farm in Monmouth	IL	1	2000	Bhatti2005-1-2000	Table 2	"agronomic practices were typical of common agricultural practices in the corn growing region"	335	na	no	yes	split plot	na				V6 to R4	yes	0.2	4	no insecticide	na
864	15	Bhatti2005	Bhatti, M. A., J. Duan, G. P. Head, C. Jiang, M. J. McKee, T. E. Nickson, C. L. Pilcher, and C. D. Pilcher	2005	Environmental Entomology	34(5): 1336-1345	Field evaluation of the impact of corn rootworm (Coleoptera: Chrysomelidae)-protected Bt corn on foliage-dwelling arthropods	private	seed-chemical industry	yes	USA	North America	field	study	no	na	no	maize	maize	IMI	IMI	0.6	na	MON 863	yes	yes	na	Monsanto research farm in Monmouth	IL	1	2001	Bhatti2005-1-2001	Table 2	"agronomic practices were typical of common agricultural practices in the corn growing region"	335	na	no	yes	split plot	na				V6 to R4	yes	0.2	4	no insecticide	na
867	15	Bhatti2005	Bhatti, M. A., J. Duan, G. P. Head, C. Jiang, M. J. McKee, T. E. Nickson, C. L. Pilcher, and C. D. Pilcher	2005	Environmental Entomology	34(5): 1336-1345	Field evaluation of the impact of corn rootworm (Coleoptera: Chrysomelidae)-protected Bt corn on foliage-dwelling arthropods	private	seed-chemical industry	yes	USA	North America	field	study	no	na	no	maize	maize	IMI	IMI	0.6	na	RX670	no	na	na	Monsanto research farm in Monmouth	IL	1	2001	Bhatti2005-1-2001	Table 2	"agronomic practices were typical of common agricultural practices in the corn growing region"	335	na	no	yes	split plot	na				V6 to R4	yes	0.2	4	no insecticide	na
870	15	Bhatti2005	Bhatti, M. A., J. Duan, G. P. Head, C. Jiang, M. J. McKee, T. E. Nickson, C. L. Pilcher, and C. D. Pilcher	2005	Environmental Entomology	34(5): 1336-1345	Field evaluation of the impact of corn rootworm (Coleoptera: Chrysomelidae)-protected Bt corn on foliage-dwelling arthropods	private	seed-chemical industry	yes	USA	North America	field	study	no	na	no	maize	maize	IMI	IMI	0.6	na	MON 863	yes	yes	na	Monsanto research farm in Monmouth	IL	1	2002	Bhatti2005-1-2002	Table 2	"agronomic practices were typical of common agricultural practices in the corn growing region"	335	na	no	yes	split plot	na				V6 to R4	yes	0.2	4	no insecticide	na
873	15	Bhatti2005	Bhatti, M. A., J. Duan, G. P. Head, C. Jiang, M. J. McKee, T. E. Nickson, C. L. Pilcher, and C. D. Pilcher	2005	Environmental Entomology	34(5): 1336-1345	Field evaluation of the impact of corn rootworm (Coleoptera: Chrysomelidae)-protected Bt corn on foliage-dwelling arthropods	private	seed-chemical industry	yes	USA	North America	field	study	no	na	no	maize	maize	IMI	IMI	0.6	na	RX670	no	na	na	Monsanto research farm in Monmouth	IL	1	2002	Bhatti2005-1-2002	Table 2	"agronomic practices were typical of common agricultural practices in the corn growing region"	335	na	no	yes	split plot	na				V6 to R4	yes	0.2	4	no insecticide	na
876	15	Bhatti2005	Bhatti, M. A., J. Duan, G. P. Head, C. Jiang, M. J. McKee, T. E. Nickson, C. L. Pilcher, and C. D. Pilcher	2005	Environmental Entomology	34(5): 1336-1345	Field evaluation of the impact of corn rootworm (Coleoptera: Chrysomelidae)-protected Bt corn on foliage-dwelling arthropods	private	seed-chemical industry	yes	USA	North America	field	study	no	na	no	maize	maize	IMI	IMI	0.6	na	MON 863	yes	yes	na	Monsanto research farm in Monmouth	IL	1	2000	Bhatti2005-1-2000	Table 2	"agronomic practices were typical of common agricultural practices in the corn growing region"	335	na	no	yes	split plot	na				V6 to R4	yes	0.2	4	no insecticide	na
879	15	Bhatti2005	Bhatti, M. A., J. Duan, G. P. Head, C. Jiang, M. J. McKee, T. E. Nickson, C. L. Pilcher, and C. D. Pilcher	2005	Environmental Entomology	34(5): 1336-1345	Field evaluation of the impact of corn rootworm (Coleoptera: Chrysomelidae)-protected Bt corn on foliage-dwelling arthropods	private	seed-chemical industry	yes	USA	North America	field	study	no	na	no	maize	maize	IMI	IMI	0.6	na	RX670	no	na	na	Monsanto research farm in Monmouth	IL	1	2000	Bhatti2005-1-2000	Table 2	"agronomic practices were typical of common agricultural practices in the corn growing region"	335	na	no	yes	split plot	na				V6 to R4	yes	0.2	4	no insecticide	na
882	15	Bhatti2005	Bhatti, M. A., J. Duan, G. P. Head, C. Jiang, M. J. McKee, T. E. Nickson, C. L. Pilcher, and C. D. Pilcher	2005	Environmental Entomology	34(5): 1336-1345	Field evaluation of the impact of corn rootworm (Coleoptera: Chrysomelidae)-protected Bt corn on foliage-dwelling arthropods	private	seed-chemical industry	yes	USA	North America	field	study	no	na	no	maize	maize	IMI	IMI	0.6	na	MON 863	yes	yes	na	Monsanto research farm in Monmouth	IL	1	2001	Bhatti2005-1-2001	Table 2	"agronomic practices were typical of common agricultural practices in the corn growing region"	335	na	no	yes	split plot	na				V6 to R4	yes	0.2	4	no insecticide	na
885	15	Bhatti2005	Bhatti, M. A., J. Duan, G. P. Head, C. Jiang, M. J. McKee, T. E. Nickson, C. L. Pilcher, and C. D. Pilcher	2005	Environmental Entomology	34(5): 1336-1345	Field evaluation of the impact of corn rootworm (Coleoptera: Chrysomelidae)-protected Bt corn on foliage-dwelling arthropods	private	seed-chemical industry	yes	USA	North America	field	study	no	na	no	maize	maize	IMI	IMI	0.6	na	RX670	no	na	na	Monsanto research farm in Monmouth	IL	1	2001	Bhatti2005-1-2001	Table 2	"agronomic practices were typical of common agricultural practices in the corn growing region"	335	na	no	yes	split plot	na				V6 to R4	yes	0.2	4	no insecticide	na
888	15	Bhatti2005	Bhatti, M. A., J. Duan, G. P. Head, C. Jiang, M. J. McKee, T. E. Nickson, C. L. Pilcher, and C. D. Pilcher	2005	Environmental Entomology	34(5): 1336-1345	Field evaluation of the impact of corn rootworm (Coleoptera: Chrysomelidae)-protected Bt corn on foliage-dwelling arthropods	private	seed-chemical industry	yes	USA	North America	field	study	no	na	no	maize	maize	IMI	IMI	0.6	na	MON 863	yes	yes	na	Monsanto research farm in Monmouth	IL	1	2002	Bhatti2005-1-2002	Table 2	"agronomic practices were typical of common agricultural practices in the corn growing region"	335	na	no	yes	split plot	na				V6 to R4	yes	0.2	4	no insecticide	na
891	15	Bhatti2005	Bhatti, M. A., J. Duan, G. P. Head, C. Jiang, M. J. McKee, T. E. Nickson, C. L. Pilcher, and C. D. Pilcher	2005	Environmental Entomology	34(5): 1336-1345	Field evaluation of the impact of corn rootworm (Coleoptera: Chrysomelidae)-protected Bt corn on foliage-dwelling arthropods	private	seed-chemical industry	yes	USA	North America	field	study	no	na	no	maize	maize	IMI	IMI	0.6	na	RX670	no	na	na	Monsanto research farm in Monmouth	IL	1	2002	Bhatti2005-1-2002	Table 2	"agronomic practices were typical of common agricultural practices in the corn growing region"	335	na	no	yes	split plot	na				V6 to R4	yes	0.2	4	no insecticide	na
894	16	Ohnesorg2009	Ohnesorg, W. J., K. D. Johnson, and M. E. O'Neal.	2009	Journal of Economic Entomology	102(5): 1816-1826	Impact of reduced-risk insecticides on soybean aphid and associated natural enemies	public	crop industry/seed-chemical industry	yes	USA	North America	field	author	no	author provided seasonal means	no	soybean	soybean	IMI	IMI	0.25	na	NK S24-K4 RR	yes	na	yes	North East Research Farm in Floyd County	IA	1	2005	Ohnesorg2009-1-2005	author spreadsheet	no-till practices were used, soybean at 76-cm row spacing and 470,000 seeds per ha	150	na	no	yes	randomized block	2005-05-22				Sampling dates are unclear from methods and results	yes	0.14	na	no insecticide	na
895	16	Ohnesorg2009	Ohnesorg, W. J., K. D. Johnson, and M. E. O'Neal.	2009	Journal of Economic Entomology	102(5): 1816-1826	Impact of reduced-risk insecticides on soybean aphid and associated natural enemies	public	crop industry/seed-chemical industry	yes	USA	North America	field	author	no	author provided seasonal means	no	soybean	soybean	THX	THX/CLO	na	na	NK S24-K4 RR	yes	na	yes	North East Research Farm in Floyd County	IA	1	2005	Ohnesorg2009-1-2005	author spreadsheet	no-till practices were used, soybean at 76-cm row spacing and 470,000 seeds per ha	150	na	no	yes	randomized block	2005-05-22				Sampling dates are unclear from methods and results	yes	0.14	na	no insecticide	na
896	16	Ohnesorg2009	Ohnesorg, W. J., K. D. Johnson, and M. E. O'Neal.	2009	Journal of Economic Entomology	102(5): 1816-1826	Impact of reduced-risk insecticides on soybean aphid and associated natural enemies	public	crop industry/seed-chemical industry	yes	USA	North America	field	author	no	author provided seasonal means	no	soybean	soybean	IMI	IMI	0.25	na	NK S24-K4 RR	yes	na	yes	North East Research Farm in Floyd County	IA	1	2005	Ohnesorg2009-1-2005	author spreadsheet	no-till practices were used, soybean at 76-cm row spacing and 470,000 seeds per ha	150	na	no	yes	randomized block	2005-05-22				Sampling dates are unclear from methods and results	yes	0.14	na	no insecticide	na
897	16	Ohnesorg2009	Ohnesorg, W. J., K. D. Johnson, and M. E. O'Neal.	2009	Journal of Economic Entomology	102(5): 1816-1826	Impact of reduced-risk insecticides on soybean aphid and associated natural enemies	public	crop industry/seed-chemical industry	yes	USA	North America	field	author	no	author provided seasonal means	no	soybean	soybean	THX	THX/CLO	na	na	NK S24-K4 RR	yes	na	yes	North East Research Farm in Floyd County	IA	1	2005	Ohnesorg2009-1-2005	author spreadsheet	no-till practices were used, soybean at 76-cm row spacing and 470,000 seeds per ha	150	na	no	yes	randomized block	2005-05-22				Sampling dates are unclear from methods and results	yes	0.14	na	no insecticide	na
898	16	Ohnesorg2009	Ohnesorg, W. J., K. D. Johnson, and M. E. O'Neal.	2009	Journal of Economic Entomology	102(5): 1816-1826	Impact of reduced-risk insecticides on soybean aphid and associated natural enemies	public	crop industry/seed-chemical industry	yes	USA	North America	field	author	no	author provided seasonal means	no	soybean	soybean	IMI	IMI	0.25	na	NK S24-K4 RR	yes	na	yes	North East Research Farm in Floyd County	IA	1	2005	Ohnesorg2009-1-2005	author spreadsheet	no-till practices were used, soybean at 76-cm row spacing and 470,000 seeds per ha	150	na	no	yes	randomized block	2005-05-22				Sampling dates are unclear from methods and results	yes	0.14	na	no insecticide	na
899	16	Ohnesorg2009	Ohnesorg, W. J., K. D. Johnson, and M. E. O'Neal.	2009	Journal of Economic Entomology	102(5): 1816-1826	Impact of reduced-risk insecticides on soybean aphid and associated natural enemies	public	crop industry/seed-chemical industry	yes	USA	North America	field	author	no	author provided seasonal means	no	soybean	soybean	THX	THX/CLO	na	na	NK S24-K4 RR	yes	na	yes	North East Research Farm in Floyd County	IA	1	2005	Ohnesorg2009-1-2005	author spreadsheet	no-till practices were used, soybean at 76-cm row spacing and 470,000 seeds per ha	150	na	no	yes	randomized block	2005-05-22				Sampling dates are unclear from methods and results	yes	0.14	na	no insecticide	na
900	16	Ohnesorg2009	Ohnesorg, W. J., K. D. Johnson, and M. E. O'Neal.	2009	Journal of Economic Entomology	102(5): 1816-1826	Impact of reduced-risk insecticides on soybean aphid and associated natural enemies	public	crop industry/seed-chemical industry	yes	USA	North America	field	author	no	author provided seasonal means	no	soybean	soybean	IMI	IMI	0.25	na	NK S24-K4 RR	yes	na	yes	North East Research Farm in Floyd County	IA	1	2005	Ohnesorg2009-1-2005	author spreadsheet	no-till practices were used, soybean at 76-cm row spacing and 470,000 seeds per ha	150	na	no	yes	randomized block	2005-05-22				Sampling dates are unclear from methods and results	yes	0.14	na	no insecticide	na
901	16	Ohnesorg2009	Ohnesorg, W. J., K. D. Johnson, and M. E. O'Neal.	2009	Journal of Economic Entomology	102(5): 1816-1826	Impact of reduced-risk insecticides on soybean aphid and associated natural enemies	public	crop industry/seed-chemical industry	yes	USA	North America	field	author	no	author provided seasonal means	no	soybean	soybean	THX	THX/CLO	na	na	NK S24-K4 RR	yes	na	yes	North East Research Farm in Floyd County	IA	1	2005	Ohnesorg2009-1-2005	author spreadsheet	no-till practices were used, soybean at 76-cm row spacing and 470,000 seeds per ha	150	na	no	yes	randomized block	2005-05-22				Sampling dates are unclear from methods and results	yes	0.14	na	no insecticide	na
902	16	Ohnesorg2009	Ohnesorg, W. J., K. D. Johnson, and M. E. O'Neal.	2009	Journal of Economic Entomology	102(5): 1816-1826	Impact of reduced-risk insecticides on soybean aphid and associated natural enemies	public	crop industry/seed-chemical industry	yes	USA	North America	field	author	no	author provided seasonal means	no	soybean	soybean	IMI	IMI	0.25	na	NK S24-K4 RR	yes	na	yes	North East Research Farm in Floyd County	IA	1	2005	Ohnesorg2009-1-2005	author spreadsheet	no-till practices were used, soybean at 76-cm row spacing and 470,000 seeds per ha	150	na	no	yes	randomized block	2005-05-22				Sampling dates are unclear from methods and results	yes	0.14	na	no insecticide	na
903	16	Ohnesorg2009	Ohnesorg, W. J., K. D. Johnson, and M. E. O'Neal.	2009	Journal of Economic Entomology	102(5): 1816-1826	Impact of reduced-risk insecticides on soybean aphid and associated natural enemies	public	crop industry/seed-chemical industry	yes	USA	North America	field	author	no	author provided seasonal means	no	soybean	soybean	THX	THX/CLO	na	na	NK S24-K4 RR	yes	na	yes	North East Research Farm in Floyd County	IA	1	2005	Ohnesorg2009-1-2005	author spreadsheet	no-till practices were used, soybean at 76-cm row spacing and 470,000 seeds per ha	150	na	no	yes	randomized block	2005-05-22				Sampling dates are unclear from methods and results	yes	0.14	na	no insecticide	na
904	16	Ohnesorg2009	Ohnesorg, W. J., K. D. Johnson, and M. E. O'Neal.	2009	Journal of Economic Entomology	102(5): 1816-1826	Impact of reduced-risk insecticides on soybean aphid and associated natural enemies	public	crop industry/seed-chemical industry	yes	USA	North America	field	author	no	author provided seasonal means	no	soybean	soybean	IMI	IMI	0.25	na	NK S24-K4 RR	yes	na	yes	North East Research Farm in Floyd County	IA	1	2005	Ohnesorg2009-1-2005	author spreadsheet	no-till practices were used, soybean at 76-cm row spacing and 470,000 seeds per ha	150	na	no	yes	randomized block	2005-05-22				Sampling dates are unclear from methods and results	yes	0.14	na	no insecticide	na
905	16	Ohnesorg2009	Ohnesorg, W. J., K. D. Johnson, and M. E. O'Neal.	2009	Journal of Economic Entomology	102(5): 1816-1826	Impact of reduced-risk insecticides on soybean aphid and associated natural enemies	public	crop industry/seed-chemical industry	yes	USA	North America	field	author	no	author provided seasonal means	no	soybean	soybean	THX	THX/CLO	na	na	NK S24-K4 RR	yes	na	yes	North East Research Farm in Floyd County	IA	1	2005	Ohnesorg2009-1-2005	author spreadsheet	no-till practices were used, soybean at 76-cm row spacing and 470,000 seeds per ha	150	na	no	yes	randomized block	2005-05-22				Sampling dates are unclear from methods and results	yes	0.14	na	no insecticide	na
906	16	Ohnesorg2009	Ohnesorg, W. J., K. D. Johnson, and M. E. O'Neal.	2009	Journal of Economic Entomology	102(5): 1816-1826	Impact of reduced-risk insecticides on soybean aphid and associated natural enemies	public	crop industry/seed-chemical industry	yes	USA	North America	field	author	no	author provided seasonal means	no	soybean	soybean	IMI	IMI	0.25	na	NK S24-K4 RR	yes	na	yes	North East Research Farm in Floyd County	IA	1	2005	Ohnesorg2009-1-2005	author spreadsheet	no-till practices were used, soybean at 76-cm row spacing and 470,000 seeds per ha	150	na	no	yes	randomized block	2005-05-22				Sampling dates are unclear from methods and results	yes	0.14	na	no insecticide	na
907	16	Ohnesorg2009	Ohnesorg, W. J., K. D. Johnson, and M. E. O'Neal.	2009	Journal of Economic Entomology	102(5): 1816-1826	Impact of reduced-risk insecticides on soybean aphid and associated natural enemies	public	crop industry/seed-chemical industry	yes	USA	North America	field	author	no	author provided seasonal means	no	soybean	soybean	THX	THX/CLO	na	na	NK S24-K4 RR	yes	na	yes	North East Research Farm in Floyd County	IA	1	2005	Ohnesorg2009-1-2005	author spreadsheet	no-till practices were used, soybean at 76-cm row spacing and 470,000 seeds per ha	150	na	no	yes	randomized block	2005-05-22				Sampling dates are unclear from methods and results	yes	0.14	na	no insecticide	na
908	16	Ohnesorg2009	Ohnesorg, W. J., K. D. Johnson, and M. E. O'Neal.	2009	Journal of Economic Entomology	102(5): 1816-1826	Impact of reduced-risk insecticides on soybean aphid and associated natural enemies	public	crop industry/seed-chemical industry	yes	USA	North America	field	author	no	author provided seasonal means	no	soybean	soybean	IMI	IMI	0.25	na	NK S24-K4 RR	yes	na	yes	North East Research Farm in Floyd County	IA	1	2005	Ohnesorg2009-1-2005	author spreadsheet	no-till practices were used, soybean at 76-cm row spacing and 470,000 seeds per ha	150	na	no	yes	randomized block	2005-05-22				Sampling dates are unclear from methods and results	yes	0.14	na	no insecticide	na
909	16	Ohnesorg2009	Ohnesorg, W. J., K. D. Johnson, and M. E. O'Neal.	2009	Journal of Economic Entomology	102(5): 1816-1826	Impact of reduced-risk insecticides on soybean aphid and associated natural enemies	public	crop industry/seed-chemical industry	yes	USA	North America	field	author	no	author provided seasonal means	no	soybean	soybean	THX	THX/CLO	na	na	NK S24-K4 RR	yes	na	yes	North East Research Farm in Floyd County	IA	1	2005	Ohnesorg2009-1-2005	author spreadsheet	no-till practices were used, soybean at 76-cm row spacing and 470,000 seeds per ha	150	na	no	yes	randomized block	2005-05-22				Sampling dates are unclear from methods and results	yes	0.14	na	no insecticide	na
910	16	Ohnesorg2009	Ohnesorg, W. J., K. D. Johnson, and M. E. O'Neal.	2009	Journal of Economic Entomology	102(5): 1816-1826	Impact of reduced-risk insecticides on soybean aphid and associated natural enemies	public	crop industry/seed-chemical industry	yes	USA	North America	field	author	no	author provided seasonal means	no	soybean	soybean	IMI	IMI	0.25	na	NK S24-K4 RR	yes	na	yes	North East Research Farm in Floyd County	IA	1	2005	Ohnesorg2009-1-2005	author spreadsheet	no-till practices were used, soybean at 76-cm row spacing and 470,000 seeds per ha	150	na	no	yes	randomized block	2005-05-22				Sampling dates are unclear from methods and results	yes	0.14	na	no insecticide	na
911	16	Ohnesorg2009	Ohnesorg, W. J., K. D. Johnson, and M. E. O'Neal.	2009	Journal of Economic Entomology	102(5): 1816-1826	Impact of reduced-risk insecticides on soybean aphid and associated natural enemies	public	crop industry/seed-chemical industry	yes	USA	North America	field	author	no	author provided seasonal means	no	soybean	soybean	THX	THX/CLO	na	na	NK S24-K4 RR	yes	na	yes	North East Research Farm in Floyd County	IA	1	2005	Ohnesorg2009-1-2005	author spreadsheet	no-till practices were used, soybean at 76-cm row spacing and 470,000 seeds per ha	150	na	no	yes	randomized block	2005-05-22				Sampling dates are unclear from methods and results	yes	0.14	na	no insecticide	na
912	16	Ohnesorg2009	Ohnesorg, W. J., K. D. Johnson, and M. E. O'Neal.	2009	Journal of Economic Entomology	102(5): 1816-1826	Impact of reduced-risk insecticides on soybean aphid and associated natural enemies	public	crop industry/seed-chemical industry	yes	USA	North America	field	author	no	author provided seasonal means	no	soybean	soybean	IMI	IMI	0.25	na	NK S24-K4 RR	yes	na	yes	North East Research Farm in Floyd County	IA	1	2005	Ohnesorg2009-1-2005	author spreadsheet	no-till practices were used, soybean at 76-cm row spacing and 470,000 seeds per ha	150	na	no	yes	randomized block	2005-05-22				Sampling dates are unclear from methods and results	yes	0.14	na	no insecticide	na
913	16	Ohnesorg2009	Ohnesorg, W. J., K. D. Johnson, and M. E. O'Neal.	2009	Journal of Economic Entomology	102(5): 1816-1826	Impact of reduced-risk insecticides on soybean aphid and associated natural enemies	public	crop industry/seed-chemical industry	yes	USA	North America	field	author	no	author provided seasonal means	no	soybean	soybean	THX	THX/CLO	na	na	NK S24-K4 RR	yes	na	yes	North East Research Farm in Floyd County	IA	1	2005	Ohnesorg2009-1-2005	author spreadsheet	no-till practices were used, soybean at 76-cm row spacing and 470,000 seeds per ha	150	na	no	yes	randomized block	2005-05-22				Sampling dates are unclear from methods and results	yes	0.14	na	no insecticide	na
914	16	Ohnesorg2009	Ohnesorg, W. J., K. D. Johnson, and M. E. O'Neal.	2009	Journal of Economic Entomology	102(5): 1816-1826	Impact of reduced-risk insecticides on soybean aphid and associated natural enemies	public	crop industry/seed-chemical industry	yes	USA	North America	field	author	no	author provided seasonal means	no	soybean	soybean	IMI	IMI	0.25	na	NK S24-K4 RR	yes	na	yes	North East Research Farm in Floyd County	IA	1	2005	Ohnesorg2009-1-2005	author spreadsheet	no-till practices were used, soybean at 76-cm row spacing and 470,000 seeds per ha	150	na	no	yes	randomized block	2005-05-22				Sampling dates are unclear from methods and results	yes	0.14	na	no insecticide	na
915	16	Ohnesorg2009	Ohnesorg, W. J., K. D. Johnson, and M. E. O'Neal.	2009	Journal of Economic Entomology	102(5): 1816-1826	Impact of reduced-risk insecticides on soybean aphid and associated natural enemies	public	crop industry/seed-chemical industry	yes	USA	North America	field	author	no	author provided seasonal means	no	soybean	soybean	THX	THX/CLO	na	na	NK S24-K4 RR	yes	na	yes	North East Research Farm in Floyd County	IA	1	2005	Ohnesorg2009-1-2005	author spreadsheet	no-till practices were used, soybean at 76-cm row spacing and 470,000 seeds per ha	150	na	no	yes	randomized block	2005-05-22				Sampling dates are unclear from methods and results	yes	0.14	na	no insecticide	na
916	16	Ohnesorg2009	Ohnesorg, W. J., K. D. Johnson, and M. E. O'Neal.	2009	Journal of Economic Entomology	102(5): 1816-1826	Impact of reduced-risk insecticides on soybean aphid and associated natural enemies	public	crop industry/seed-chemical industry	yes	USA	North America	field	author	no	author provided seasonal means	no	soybean	soybean	IMI	IMI	0.25	na	NK S24-K4 RR	yes	na	yes	North East Research Farm in Floyd County	IA	1	2005	Ohnesorg2009-1-2005	author spreadsheet	no-till practices were used, soybean at 76-cm row spacing and 470,000 seeds per ha	150	na	no	yes	randomized block	2005-05-22				Sampling dates are unclear from methods and results	yes	0.14	na	no insecticide	na
917	16	Ohnesorg2009	Ohnesorg, W. J., K. D. Johnson, and M. E. O'Neal.	2009	Journal of Economic Entomology	102(5): 1816-1826	Impact of reduced-risk insecticides on soybean aphid and associated natural enemies	public	crop industry/seed-chemical industry	yes	USA	North America	field	author	no	author provided seasonal means	no	soybean	soybean	THX	THX/CLO	na	na	NK S24-K4 RR	yes	na	yes	North East Research Farm in Floyd County	IA	1	2005	Ohnesorg2009-1-2005	author spreadsheet	no-till practices were used, soybean at 76-cm row spacing and 470,000 seeds per ha	150	na	no	yes	randomized block	2005-05-22				Sampling dates are unclear from methods and results	yes	0.14	na	no insecticide	na
918	16	Ohnesorg2009	Ohnesorg, W. J., K. D. Johnson, and M. E. O'Neal.	2009	Journal of Economic Entomology	102(5): 1816-1826	Impact of reduced-risk insecticides on soybean aphid and associated natural enemies	public	crop industry/seed-chemical industry	yes	USA	North America	field	author	no	author provided seasonal means	no	soybean	soybean	IMI	IMI	0.25	na	NK S24-K4 RR	yes	na	yes	North East Research Farm in Floyd County	IA	1	2005	Ohnesorg2009-1-2005	author spreadsheet	no-till practices were used, soybean at 76-cm row spacing and 470,000 seeds per ha	150	na	no	yes	randomized block	2005-05-22				Sampling dates are unclear from methods and results	yes	0.14	na	no insecticide	na
919	16	Ohnesorg2009	Ohnesorg, W. J., K. D. Johnson, and M. E. O'Neal.	2009	Journal of Economic Entomology	102(5): 1816-1826	Impact of reduced-risk insecticides on soybean aphid and associated natural enemies	public	crop industry/seed-chemical industry	yes	USA	North America	field	author	no	author provided seasonal means	no	soybean	soybean	THX	THX/CLO	na	na	NK S24-K4 RR	yes	na	yes	North East Research Farm in Floyd County	IA	1	2005	Ohnesorg2009-1-2005	author spreadsheet	no-till practices were used, soybean at 76-cm row spacing and 470,000 seeds per ha	150	na	no	yes	randomized block	2005-05-22				Sampling dates are unclear from methods and results	yes	0.14	na	no insecticide	na
920	16	Ohnesorg2009	Ohnesorg, W. J., K. D. Johnson, and M. E. O'Neal.	2009	Journal of Economic Entomology	102(5): 1816-1826	Impact of reduced-risk insecticides on soybean aphid and associated natural enemies	public	crop industry/seed-chemical industry	yes	USA	North America	field	author	no	author provided seasonal means	no	soybean	soybean	IMI	IMI	0.25	na	NK S24-K4 RR	yes	na	yes	North East Research Farm in Floyd County	IA	1	2005	Ohnesorg2009-1-2005	author spreadsheet	no-till practices were used, soybean at 76-cm row spacing and 470,000 seeds per ha	150	na	no	yes	randomized block	2005-05-22				Sampling dates are unclear from methods and results	yes	0.14	na	no insecticide	na
921	16	Ohnesorg2009	Ohnesorg, W. J., K. D. Johnson, and M. E. O'Neal.	2009	Journal of Economic Entomology	102(5): 1816-1826	Impact of reduced-risk insecticides on soybean aphid and associated natural enemies	public	crop industry/seed-chemical industry	yes	USA	North America	field	author	no	author provided seasonal means	no	soybean	soybean	THX	THX/CLO	na	na	NK S24-K4 RR	yes	na	yes	North East Research Farm in Floyd County	IA	1	2005	Ohnesorg2009-1-2005	author spreadsheet	no-till practices were used, soybean at 76-cm row spacing and 470,000 seeds per ha	150	na	no	yes	randomized block	2005-05-22				Sampling dates are unclear from methods and results	yes	0.14	na	no insecticide	na
922	16	Ohnesorg2009	Ohnesorg, W. J., K. D. Johnson, and M. E. O'Neal.	2009	Journal of Economic Entomology	102(5): 1816-1826	Impact of reduced-risk insecticides on soybean aphid and associated natural enemies	public	crop industry/seed-chemical industry	yes	USA	North America	field	author	no	author provided seasonal means	no	soybean	soybean	IMI	IMI	0.25	na	NK S24-K4 RR	yes	na	yes	North East Research Farm in Floyd County	IA	1	2005	Ohnesorg2009-1-2005	author spreadsheet	no-till practices were used, soybean at 76-cm row spacing and 470,000 seeds per ha	150	na	no	yes	randomized block	2005-05-22				Sampling dates are unclear from methods and results	yes	0.14	na	no insecticide	na
923	16	Ohnesorg2009	Ohnesorg, W. J., K. D. Johnson, and M. E. O'Neal.	2009	Journal of Economic Entomology	102(5): 1816-1826	Impact of reduced-risk insecticides on soybean aphid and associated natural enemies	public	crop industry/seed-chemical industry	yes	USA	North America	field	author	no	author provided seasonal means	no	soybean	soybean	THX	THX/CLO	na	na	NK S24-K4 RR	yes	na	yes	North East Research Farm in Floyd County	IA	1	2005	Ohnesorg2009-1-2005	author spreadsheet	no-till practices were used, soybean at 76-cm row spacing and 470,000 seeds per ha	150	na	no	yes	randomized block	2005-05-22				Sampling dates are unclear from methods and results	yes	0.14	na	no insecticide	na
924	16	Ohnesorg2009	Ohnesorg, W. J., K. D. Johnson, and M. E. O'Neal.	2009	Journal of Economic Entomology	102(5): 1816-1826	Impact of reduced-risk insecticides on soybean aphid and associated natural enemies	public	crop industry/seed-chemical industry	yes	USA	North America	field	author	no	author provided seasonal means	no	soybean	soybean	IMI	IMI	0.25	na	NK S24-K4 RR	yes	na	yes	North East Research Farm in Floyd County	IA	1	2005	Ohnesorg2009-1-2005	author spreadsheet	no-till practices were used, soybean at 76-cm row spacing and 470,000 seeds per ha	150	na	no	yes	randomized block	2005-05-22				Sampling dates are unclear from methods and results	yes	0.14	na	no insecticide	na
925	16	Ohnesorg2009	Ohnesorg, W. J., K. D. Johnson, and M. E. O'Neal.	2009	Journal of Economic Entomology	102(5): 1816-1826	Impact of reduced-risk insecticides on soybean aphid and associated natural enemies	public	crop industry/seed-chemical industry	yes	USA	North America	field	author	no	author provided seasonal means	no	soybean	soybean	THX	THX/CLO	na	na	NK S24-K4 RR	yes	na	yes	North East Research Farm in Floyd County	IA	1	2005	Ohnesorg2009-1-2005	author spreadsheet	no-till practices were used, soybean at 76-cm row spacing and 470,000 seeds per ha	150	na	no	yes	randomized block	2005-05-22				Sampling dates are unclear from methods and results	yes	0.14	na	no insecticide	na
926	16	Ohnesorg2009	Ohnesorg, W. J., K. D. Johnson, and M. E. O'Neal.	2009	Journal of Economic Entomology	102(5): 1816-1826	Impact of reduced-risk insecticides on soybean aphid and associated natural enemies	public	crop industry/seed-chemical industry	yes	USA	North America	field	author	no	author provided seasonal means	no	soybean	soybean	IMI	IMI	0.25	na	NK S23-Z3 RR	yes	na	yes	North East Research Farm in Floyd County	IA	2	2006	Ohnesorg2009-2-2006	author spreadsheet	no-till practices were used, soybean at 76-cm row spacing and 470,000 seeds per ha	150	na	no	yes	randomized block	2006-05-06				Sampling dates are unclear from methods and results	yes	0.14	na	no insecticide	na
927	16	Ohnesorg2009	Ohnesorg, W. J., K. D. Johnson, and M. E. O'Neal.	2009	Journal of Economic Entomology	102(5): 1816-1826	Impact of reduced-risk insecticides on soybean aphid and associated natural enemies	public	crop industry/seed-chemical industry	yes	USA	North America	field	author	no	author provided seasonal means	no	soybean	soybean	THX	THX/CLO	na	na	NK S23-Z3 RR	yes	na	yes	North East Research Farm in Floyd County	IA	2	2006	Ohnesorg2009-2-2006	author spreadsheet	no-till practices were used, soybean at 76-cm row spacing and 470,000 seeds per ha	150	na	no	yes	randomized block	2006-05-06				Sampling dates are unclear from methods and results	yes	0.14	na	no insecticide	na
928	16	Ohnesorg2009	Ohnesorg, W. J., K. D. Johnson, and M. E. O'Neal.	2009	Journal of Economic Entomology	102(5): 1816-1826	Impact of reduced-risk insecticides on soybean aphid and associated natural enemies	public	crop industry/seed-chemical industry	yes	USA	North America	field	author	no	author provided seasonal means	no	soybean	soybean	IMI	IMI	0.25	na	NK S23-Z3 RR	yes	na	yes	North East Research Farm in Floyd County	IA	2	2006	Ohnesorg2009-2-2006	author spreadsheet	no-till practices were used, soybean at 76-cm row spacing and 470,000 seeds per ha	150	na	no	yes	randomized block	2006-05-06				Sampling dates are unclear from methods and results	yes	0.14	na	no insecticide	na
929	16	Ohnesorg2009	Ohnesorg, W. J., K. D. Johnson, and M. E. O'Neal.	2009	Journal of Economic Entomology	102(5): 1816-1826	Impact of reduced-risk insecticides on soybean aphid and associated natural enemies	public	crop industry/seed-chemical industry	yes	USA	North America	field	author	no	author provided seasonal means	no	soybean	soybean	THX	THX/CLO	na	na	NK S23-Z3 RR	yes	na	yes	North East Research Farm in Floyd County	IA	2	2006	Ohnesorg2009-2-2006	author spreadsheet	no-till practices were used, soybean at 76-cm row spacing and 470,000 seeds per ha	150	na	no	yes	randomized block	2006-05-06				Sampling dates are unclear from methods and results	yes	0.14	na	no insecticide	na
930	16	Ohnesorg2009	Ohnesorg, W. J., K. D. Johnson, and M. E. O'Neal.	2009	Journal of Economic Entomology	102(5): 1816-1826	Impact of reduced-risk insecticides on soybean aphid and associated natural enemies	public	crop industry/seed-chemical industry	yes	USA	North America	field	author	no	author provided seasonal means	no	soybean	soybean	IMI	IMI	0.25	na	NK S23-Z3 RR	yes	na	yes	North East Research Farm in Floyd County	IA	2	2006	Ohnesorg2009-2-2006	author spreadsheet	no-till practices were used, soybean at 76-cm row spacing and 470,000 seeds per ha	150	na	no	yes	randomized block	2006-05-06				Sampling dates are unclear from methods and results	yes	0.14	na	no insecticide	na
931	16	Ohnesorg2009	Ohnesorg, W. J., K. D. Johnson, and M. E. O'Neal.	2009	Journal of Economic Entomology	102(5): 1816-1826	Impact of reduced-risk insecticides on soybean aphid and associated natural enemies	public	crop industry/seed-chemical industry	yes	USA	North America	field	author	no	author provided seasonal means	no	soybean	soybean	THX	THX/CLO	na	na	NK S23-Z3 RR	yes	na	yes	North East Research Farm in Floyd County	IA	2	2006	Ohnesorg2009-2-2006	author spreadsheet	no-till practices were used, soybean at 76-cm row spacing and 470,000 seeds per ha	150	na	no	yes	randomized block	2006-05-06				Sampling dates are unclear from methods and results	yes	0.14	na	no insecticide	na
932	16	Ohnesorg2009	Ohnesorg, W. J., K. D. Johnson, and M. E. O'Neal.	2009	Journal of Economic Entomology	102(5): 1816-1826	Impact of reduced-risk insecticides on soybean aphid and associated natural enemies	public	crop industry/seed-chemical industry	yes	USA	North America	field	author	no	author provided seasonal means	no	soybean	soybean	IMI	IMI	0.25	na	NK S23-Z3 RR	yes	na	yes	North East Research Farm in Floyd County	IA	2	2006	Ohnesorg2009-2-2006	author spreadsheet	no-till practices were used, soybean at 76-cm row spacing and 470,000 seeds per ha	150	na	no	yes	randomized block	2006-05-06				Sampling dates are unclear from methods and results	yes	0.14	na	no insecticide	na
933	16	Ohnesorg2009	Ohnesorg, W. J., K. D. Johnson, and M. E. O'Neal.	2009	Journal of Economic Entomology	102(5): 1816-1826	Impact of reduced-risk insecticides on soybean aphid and associated natural enemies	public	crop industry/seed-chemical industry	yes	USA	North America	field	author	no	author provided seasonal means	no	soybean	soybean	THX	THX/CLO	na	na	NK S23-Z3 RR	yes	na	yes	North East Research Farm in Floyd County	IA	2	2006	Ohnesorg2009-2-2006	author spreadsheet	no-till practices were used, soybean at 76-cm row spacing and 470,000 seeds per ha	150	na	no	yes	randomized block	2006-05-06				Sampling dates are unclear from methods and results	yes	0.14	na	no insecticide	na
934	16	Ohnesorg2009	Ohnesorg, W. J., K. D. Johnson, and M. E. O'Neal.	2009	Journal of Economic Entomology	102(5): 1816-1826	Impact of reduced-risk insecticides on soybean aphid and associated natural enemies	public	crop industry/seed-chemical industry	yes	USA	North America	field	author	no	author provided seasonal means	no	soybean	soybean	IMI	IMI	0.25	na	NK S23-Z3 RR	yes	na	yes	North East Research Farm in Floyd County	IA	2	2006	Ohnesorg2009-2-2006	author spreadsheet	no-till practices were used, soybean at 76-cm row spacing and 470,000 seeds per ha	150	na	no	yes	randomized block	2006-05-06				Sampling dates are unclear from methods and results	yes	0.14	na	no insecticide	na
935	16	Ohnesorg2009	Ohnesorg, W. J., K. D. Johnson, and M. E. O'Neal.	2009	Journal of Economic Entomology	102(5): 1816-1826	Impact of reduced-risk insecticides on soybean aphid and associated natural enemies	public	crop industry/seed-chemical industry	yes	USA	North America	field	author	no	author provided seasonal means	no	soybean	soybean	THX	THX/CLO	na	na	NK S23-Z3 RR	yes	na	yes	North East Research Farm in Floyd County	IA	2	2006	Ohnesorg2009-2-2006	author spreadsheet	no-till practices were used, soybean at 76-cm row spacing and 470,000 seeds per ha	150	na	no	yes	randomized block	2006-05-06				Sampling dates are unclear from methods and results	yes	0.14	na	no insecticide	na
936	16	Ohnesorg2009	Ohnesorg, W. J., K. D. Johnson, and M. E. O'Neal.	2009	Journal of Economic Entomology	102(5): 1816-1826	Impact of reduced-risk insecticides on soybean aphid and associated natural enemies	public	crop industry/seed-chemical industry	yes	USA	North America	field	author	no	author provided seasonal means	no	soybean	soybean	IMI	IMI	0.25	na	NK S23-Z3 RR	yes	na	yes	North East Research Farm in Floyd County	IA	2	2006	Ohnesorg2009-2-2006	author spreadsheet	no-till practices were used, soybean at 76-cm row spacing and 470,000 seeds per ha	150	na	no	yes	randomized block	2006-05-06				Sampling dates are unclear from methods and results	yes	0.14	na	no insecticide	na
937	16	Ohnesorg2009	Ohnesorg, W. J., K. D. Johnson, and M. E. O'Neal.	2009	Journal of Economic Entomology	102(5): 1816-1826	Impact of reduced-risk insecticides on soybean aphid and associated natural enemies	public	crop industry/seed-chemical industry	yes	USA	North America	field	author	no	author provided seasonal means	no	soybean	soybean	THX	THX/CLO	na	na	NK S23-Z3 RR	yes	na	yes	North East Research Farm in Floyd County	IA	2	2006	Ohnesorg2009-2-2006	author spreadsheet	no-till practices were used, soybean at 76-cm row spacing and 470,000 seeds per ha	150	na	no	yes	randomized block	2006-05-06				Sampling dates are unclear from methods and results	yes	0.14	na	no insecticide	na
938	16	Ohnesorg2009	Ohnesorg, W. J., K. D. Johnson, and M. E. O'Neal.	2009	Journal of Economic Entomology	102(5): 1816-1826	Impact of reduced-risk insecticides on soybean aphid and associated natural enemies	public	crop industry/seed-chemical industry	yes	USA	North America	field	author	no	author provided seasonal means	no	soybean	soybean	IMI	IMI	0.25	na	NK S23-Z3 RR	yes	na	yes	North East Research Farm in Floyd County	IA	2	2006	Ohnesorg2009-2-2006	author spreadsheet	no-till practices were used, soybean at 76-cm row spacing and 470,000 seeds per ha	150	na	no	yes	randomized block	2006-05-06				Sampling dates are unclear from methods and results	yes	0.14	na	no insecticide	na
939	16	Ohnesorg2009	Ohnesorg, W. J., K. D. Johnson, and M. E. O'Neal.	2009	Journal of Economic Entomology	102(5): 1816-1826	Impact of reduced-risk insecticides on soybean aphid and associated natural enemies	public	crop industry/seed-chemical industry	yes	USA	North America	field	author	no	author provided seasonal means	no	soybean	soybean	THX	THX/CLO	na	na	NK S23-Z3 RR	yes	na	yes	North East Research Farm in Floyd County	IA	2	2006	Ohnesorg2009-2-2006	author spreadsheet	no-till practices were used, soybean at 76-cm row spacing and 470,000 seeds per ha	150	na	no	yes	randomized block	2006-05-06				Sampling dates are unclear from methods and results	yes	0.14	na	no insecticide	na
940	16	Ohnesorg2009	Ohnesorg, W. J., K. D. Johnson, and M. E. O'Neal.	2009	Journal of Economic Entomology	102(5): 1816-1826	Impact of reduced-risk insecticides on soybean aphid and associated natural enemies	public	crop industry/seed-chemical industry	yes	USA	North America	field	author	no	author provided seasonal means	no	soybean	soybean	IMI	IMI	0.25	na	NK S23-Z3 RR	yes	na	yes	North East Research Farm in Floyd County	IA	2	2006	Ohnesorg2009-2-2006	author spreadsheet	no-till practices were used, soybean at 76-cm row spacing and 470,000 seeds per ha	150	na	no	yes	randomized block	2006-05-06				Sampling dates are unclear from methods and results	yes	0.14	na	no insecticide	na
941	16	Ohnesorg2009	Ohnesorg, W. J., K. D. Johnson, and M. E. O'Neal.	2009	Journal of Economic Entomology	102(5): 1816-1826	Impact of reduced-risk insecticides on soybean aphid and associated natural enemies	public	crop industry/seed-chemical industry	yes	USA	North America	field	author	no	author provided seasonal means	no	soybean	soybean	THX	THX/CLO	na	na	NK S23-Z3 RR	yes	na	yes	North East Research Farm in Floyd County	IA	2	2006	Ohnesorg2009-2-2006	author spreadsheet	no-till practices were used, soybean at 76-cm row spacing and 470,000 seeds per ha	150	na	no	yes	randomized block	2006-05-06				Sampling dates are unclear from methods and results	yes	0.14	na	no insecticide	na
942	16	Ohnesorg2009	Ohnesorg, W. J., K. D. Johnson, and M. E. O'Neal.	2009	Journal of Economic Entomology	102(5): 1816-1826	Impact of reduced-risk insecticides on soybean aphid and associated natural enemies	public	crop industry/seed-chemical industry	yes	USA	North America	field	author	no	author provided seasonal means	no	soybean	soybean	IMI	IMI	0.25	na	NK S23-Z3 RR	yes	na	yes	North East Research Farm in Floyd County	IA	2	2006	Ohnesorg2009-2-2006	author spreadsheet	no-till practices were used, soybean at 76-cm row spacing and 470,000 seeds per ha	150	na	no	yes	randomized block	2006-05-06				Sampling dates are unclear from methods and results	yes	0.14	na	no insecticide	na
943	16	Ohnesorg2009	Ohnesorg, W. J., K. D. Johnson, and M. E. O'Neal.	2009	Journal of Economic Entomology	102(5): 1816-1826	Impact of reduced-risk insecticides on soybean aphid and associated natural enemies	public	crop industry/seed-chemical industry	yes	USA	North America	field	author	no	author provided seasonal means	no	soybean	soybean	THX	THX/CLO	na	na	NK S23-Z3 RR	yes	na	yes	North East Research Farm in Floyd County	IA	2	2006	Ohnesorg2009-2-2006	author spreadsheet	no-till practices were used, soybean at 76-cm row spacing and 470,000 seeds per ha	150	na	no	yes	randomized block	2006-05-06				Sampling dates are unclear from methods and results	yes	0.14	na	no insecticide	na
944	16	Ohnesorg2009	Ohnesorg, W. J., K. D. Johnson, and M. E. O'Neal.	2009	Journal of Economic Entomology	102(5): 1816-1826	Impact of reduced-risk insecticides on soybean aphid and associated natural enemies	public	crop industry/seed-chemical industry	yes	USA	North America	field	author	no	author provided seasonal means	no	soybean	soybean	IMI	IMI	0.25	na	NK S23-Z3 RR	yes	na	yes	North East Research Farm in Floyd County	IA	2	2006	Ohnesorg2009-2-2006	author spreadsheet	no-till practices were used, soybean at 76-cm row spacing and 470,000 seeds per ha	150	na	no	yes	randomized block	2006-05-06				Sampling dates are unclear from methods and results	yes	0.14	na	no insecticide	na
945	16	Ohnesorg2009	Ohnesorg, W. J., K. D. Johnson, and M. E. O'Neal.	2009	Journal of Economic Entomology	102(5): 1816-1826	Impact of reduced-risk insecticides on soybean aphid and associated natural enemies	public	crop industry/seed-chemical industry	yes	USA	North America	field	author	no	author provided seasonal means	no	soybean	soybean	THX	THX/CLO	na	na	NK S23-Z3 RR	yes	na	yes	North East Research Farm in Floyd County	IA	2	2006	Ohnesorg2009-2-2006	author spreadsheet	no-till practices were used, soybean at 76-cm row spacing and 470,000 seeds per ha	150	na	no	yes	randomized block	2006-05-06				Sampling dates are unclear from methods and results	yes	0.14	na	no insecticide	na
946	16	Ohnesorg2009	Ohnesorg, W. J., K. D. Johnson, and M. E. O'Neal.	2009	Journal of Economic Entomology	102(5): 1816-1826	Impact of reduced-risk insecticides on soybean aphid and associated natural enemies	public	crop industry/seed-chemical industry	yes	USA	North America	field	author	no	author provided seasonal means	no	soybean	soybean	IMI	IMI	0.25	na	NK S23-Z3 RR	yes	na	yes	North East Research Farm in Floyd County	IA	2	2006	Ohnesorg2009-2-2006	author spreadsheet	no-till practices were used, soybean at 76-cm row spacing and 470,000 seeds per ha	150	na	no	yes	randomized block	2006-05-06				Sampling dates are unclear from methods and results	yes	0.14	na	no insecticide	na
947	16	Ohnesorg2009	Ohnesorg, W. J., K. D. Johnson, and M. E. O'Neal.	2009	Journal of Economic Entomology	102(5): 1816-1826	Impact of reduced-risk insecticides on soybean aphid and associated natural enemies	public	crop industry/seed-chemical industry	yes	USA	North America	field	author	no	author provided seasonal means	no	soybean	soybean	THX	THX/CLO	na	na	NK S23-Z3 RR	yes	na	yes	North East Research Farm in Floyd County	IA	2	2006	Ohnesorg2009-2-2006	author spreadsheet	no-till practices were used, soybean at 76-cm row spacing and 470,000 seeds per ha	150	na	no	yes	randomized block	2006-05-06				Sampling dates are unclear from methods and results	yes	0.14	na	no insecticide	na
948	16	Ohnesorg2009	Ohnesorg, W. J., K. D. Johnson, and M. E. O'Neal.	2009	Journal of Economic Entomology	102(5): 1816-1826	Impact of reduced-risk insecticides on soybean aphid and associated natural enemies	public	crop industry/seed-chemical industry	yes	USA	North America	field	author	no	author provided seasonal means	no	soybean	soybean	IMI	IMI	0.25	na	NK S23-Z3 RR	yes	na	yes	North East Research Farm in Floyd County	IA	2	2006	Ohnesorg2009-2-2006	author spreadsheet	no-till practices were used, soybean at 76-cm row spacing and 470,000 seeds per ha	150	na	no	yes	randomized block	2006-05-06				Sampling dates are unclear from methods and results	yes	0.14	na	no insecticide	na
949	16	Ohnesorg2009	Ohnesorg, W. J., K. D. Johnson, and M. E. O'Neal.	2009	Journal of Economic Entomology	102(5): 1816-1826	Impact of reduced-risk insecticides on soybean aphid and associated natural enemies	public	crop industry/seed-chemical industry	yes	USA	North America	field	author	no	author provided seasonal means	no	soybean	soybean	THX	THX/CLO	na	na	NK S23-Z3 RR	yes	na	yes	North East Research Farm in Floyd County	IA	2	2006	Ohnesorg2009-2-2006	author spreadsheet	no-till practices were used, soybean at 76-cm row spacing and 470,000 seeds per ha	150	na	no	yes	randomized block	2006-05-06				Sampling dates are unclear from methods and results	yes	0.14	na	no insecticide	na
950	16	Ohnesorg2009	Ohnesorg, W. J., K. D. Johnson, and M. E. O'Neal.	2009	Journal of Economic Entomology	102(5): 1816-1826	Impact of reduced-risk insecticides on soybean aphid and associated natural enemies	public	crop industry/seed-chemical industry	yes	USA	North America	field	author	no	author provided seasonal means	no	soybean	soybean	IMI	IMI	0.25	na	NK S23-Z3 RR	yes	na	yes	North East Research Farm in Floyd County	IA	2	2006	Ohnesorg2009-2-2006	author spreadsheet	no-till practices were used, soybean at 76-cm row spacing and 470,000 seeds per ha	150	na	no	yes	randomized block	2006-05-06				Sampling dates are unclear from methods and results	yes	0.14	na	no insecticide	na
951	16	Ohnesorg2009	Ohnesorg, W. J., K. D. Johnson, and M. E. O'Neal.	2009	Journal of Economic Entomology	102(5): 1816-1826	Impact of reduced-risk insecticides on soybean aphid and associated natural enemies	public	crop industry/seed-chemical industry	yes	USA	North America	field	author	no	author provided seasonal means	no	soybean	soybean	THX	THX/CLO	na	na	NK S23-Z3 RR	yes	na	yes	North East Research Farm in Floyd County	IA	2	2006	Ohnesorg2009-2-2006	author spreadsheet	no-till practices were used, soybean at 76-cm row spacing and 470,000 seeds per ha	150	na	no	yes	randomized block	2006-05-06				Sampling dates are unclear from methods and results	yes	0.14	na	no insecticide	na
952	16	Ohnesorg2009	Ohnesorg, W. J., K. D. Johnson, and M. E. O'Neal.	2009	Journal of Economic Entomology	102(5): 1816-1826	Impact of reduced-risk insecticides on soybean aphid and associated natural enemies	public	crop industry/seed-chemical industry	yes	USA	North America	field	author	no	author provided seasonal means	no	soybean	soybean	IMI	IMI	0.25	na	NK S23-Z3 RR	yes	na	yes	North East Research Farm in Floyd County	IA	2	2006	Ohnesorg2009-2-2006	author spreadsheet	no-till practices were used, soybean at 76-cm row spacing and 470,000 seeds per ha	150	na	no	yes	randomized block	2006-05-06				Sampling dates are unclear from methods and results	yes	0.14	na	no insecticide	na
953	16	Ohnesorg2009	Ohnesorg, W. J., K. D. Johnson, and M. E. O'Neal.	2009	Journal of Economic Entomology	102(5): 1816-1826	Impact of reduced-risk insecticides on soybean aphid and associated natural enemies	public	crop industry/seed-chemical industry	yes	USA	North America	field	author	no	author provided seasonal means	no	soybean	soybean	THX	THX/CLO	na	na	NK S23-Z3 RR	yes	na	yes	North East Research Farm in Floyd County	IA	2	2006	Ohnesorg2009-2-2006	author spreadsheet	no-till practices were used, soybean at 76-cm row spacing and 470,000 seeds per ha	150	na	no	yes	randomized block	2006-05-06				Sampling dates are unclear from methods and results	yes	0.14	na	no insecticide	na
954	16	Ohnesorg2009	Ohnesorg, W. J., K. D. Johnson, and M. E. O'Neal.	2009	Journal of Economic Entomology	102(5): 1816-1826	Impact of reduced-risk insecticides on soybean aphid and associated natural enemies	public	crop industry/seed-chemical industry	yes	USA	North America	field	author	no	author provided seasonal means	no	soybean	soybean	IMI	IMI	0.25	na	NK S23-Z3 RR	yes	na	yes	North East Research Farm in Floyd County	IA	2	2006	Ohnesorg2009-2-2006	author spreadsheet	no-till practices were used, soybean at 76-cm row spacing and 470,000 seeds per ha	150	na	no	yes	randomized block	2006-05-06				Sampling dates are unclear from methods and results	yes	0.14	na	no insecticide	na
955	16	Ohnesorg2009	Ohnesorg, W. J., K. D. Johnson, and M. E. O'Neal.	2009	Journal of Economic Entomology	102(5): 1816-1826	Impact of reduced-risk insecticides on soybean aphid and associated natural enemies	public	crop industry/seed-chemical industry	yes	USA	North America	field	author	no	author provided seasonal means	no	soybean	soybean	THX	THX/CLO	na	na	NK S23-Z3 RR	yes	na	yes	North East Research Farm in Floyd County	IA	2	2006	Ohnesorg2009-2-2006	author spreadsheet	no-till practices were used, soybean at 76-cm row spacing and 470,000 seeds per ha	150	na	no	yes	randomized block	2006-05-06				Sampling dates are unclear from methods and results	yes	0.14	na	no insecticide	na
956	16	Ohnesorg2009	Ohnesorg, W. J., K. D. Johnson, and M. E. O'Neal.	2009	Journal of Economic Entomology	102(5): 1816-1826	Impact of reduced-risk insecticides on soybean aphid and associated natural enemies	public	crop industry/seed-chemical industry	yes	USA	North America	field	author	no	author provided seasonal means	no	soybean	soybean	IMI	IMI	0.25	na	NK S23-Z3 RR	yes	na	yes	North East Research Farm in Floyd County	IA	2	2006	Ohnesorg2009-2-2006	author spreadsheet	no-till practices were used, soybean at 76-cm row spacing and 470,000 seeds per ha	150	na	no	yes	randomized block	2006-05-06				Sampling dates are unclear from methods and results	yes	0.14	na	no insecticide	na
957	16	Ohnesorg2009	Ohnesorg, W. J., K. D. Johnson, and M. E. O'Neal.	2009	Journal of Economic Entomology	102(5): 1816-1826	Impact of reduced-risk insecticides on soybean aphid and associated natural enemies	public	crop industry/seed-chemical industry	yes	USA	North America	field	author	no	author provided seasonal means	no	soybean	soybean	THX	THX/CLO	na	na	NK S23-Z3 RR	yes	na	yes	North East Research Farm in Floyd County	IA	2	2006	Ohnesorg2009-2-2006	author spreadsheet	no-till practices were used, soybean at 76-cm row spacing and 470,000 seeds per ha	150	na	no	yes	randomized block	2006-05-06				Sampling dates are unclear from methods and results	yes	0.14	na	no insecticide	na
958	16	Ohnesorg2009	Ohnesorg, W. J., K. D. Johnson, and M. E. O'Neal.	2009	Journal of Economic Entomology	102(5): 1816-1826	Impact of reduced-risk insecticides on soybean aphid and associated natural enemies	public	crop industry/seed-chemical industry	yes	USA	North America	field	author	no	author provided seasonal means	no	soybean	soybean	IMI	IMI	0.25	na	NK S23-Z3 RR	yes	na	yes	North East Research Farm in Floyd County	IA	2	2006	Ohnesorg2009-2-2006	author spreadsheet	no-till practices were used, soybean at 76-cm row spacing and 470,000 seeds per ha	150	na	no	yes	randomized block	2006-05-06				Sampling dates are unclear from methods and results	yes	0.14	na	no insecticide	na
959	16	Ohnesorg2009	Ohnesorg, W. J., K. D. Johnson, and M. E. O'Neal.	2009	Journal of Economic Entomology	102(5): 1816-1826	Impact of reduced-risk insecticides on soybean aphid and associated natural enemies	public	crop industry/seed-chemical industry	yes	USA	North America	field	author	no	author provided seasonal means	no	soybean	soybean	THX	THX/CLO	na	na	NK S23-Z3 RR	yes	na	yes	North East Research Farm in Floyd County	IA	2	2006	Ohnesorg2009-2-2006	author spreadsheet	no-till practices were used, soybean at 76-cm row spacing and 470,000 seeds per ha	150	na	no	yes	randomized block	2006-05-06				Sampling dates are unclear from methods and results	yes	0.14	na	no insecticide	na
960	16	Ohnesorg2009	Ohnesorg, W. J., K. D. Johnson, and M. E. O'Neal.	2009	Journal of Economic Entomology	102(5): 1816-1826	Impact of reduced-risk insecticides on soybean aphid and associated natural enemies	public	crop industry/seed-chemical industry	yes	USA	North America	field	author	no	author provided seasonal means	no	soybean	soybean	IMI	IMI	0.25	na	NK S23-Z3 RR	yes	na	yes	North East Research Farm in Floyd County	IA	2	2006	Ohnesorg2009-2-2006	author spreadsheet	no-till practices were used, soybean at 76-cm row spacing and 470,000 seeds per ha	150	na	no	yes	randomized block	2006-05-06				Sampling dates are unclear from methods and results	yes	0.14	na	no insecticide	na
961	16	Ohnesorg2009	Ohnesorg, W. J., K. D. Johnson, and M. E. O'Neal.	2009	Journal of Economic Entomology	102(5): 1816-1826	Impact of reduced-risk insecticides on soybean aphid and associated natural enemies	public	crop industry/seed-chemical industry	yes	USA	North America	field	author	no	author provided seasonal means	no	soybean	soybean	THX	THX/CLO	na	na	NK S23-Z3 RR	yes	na	yes	North East Research Farm in Floyd County	IA	2	2006	Ohnesorg2009-2-2006	author spreadsheet	no-till practices were used, soybean at 76-cm row spacing and 470,000 seeds per ha	150	na	no	yes	randomized block	2006-05-06				Sampling dates are unclear from methods and results	yes	0.14	na	no insecticide	na
962	16	Ohnesorg2009	Ohnesorg, W. J., K. D. Johnson, and M. E. O'Neal.	2009	Journal of Economic Entomology	102(5): 1816-1826	Impact of reduced-risk insecticides on soybean aphid and associated natural enemies	public	crop industry/seed-chemical industry	yes	USA	North America	field	author	no	author provided seasonal means	no	soybean	soybean	IMI	IMI	0.25	na	NK S23-Z3 RR	yes	na	yes	North East Research Farm in Floyd County	IA	2	2006	Ohnesorg2009-2-2006	author spreadsheet	no-till practices were used, soybean at 76-cm row spacing and 470,000 seeds per ha	150	na	no	yes	randomized block	2006-05-06				Sampling dates are unclear from methods and results	yes	0.14	na	no insecticide	na
963	16	Ohnesorg2009	Ohnesorg, W. J., K. D. Johnson, and M. E. O'Neal.	2009	Journal of Economic Entomology	102(5): 1816-1826	Impact of reduced-risk insecticides on soybean aphid and associated natural enemies	public	crop industry/seed-chemical industry	yes	USA	North America	field	author	no	author provided seasonal means	no	soybean	soybean	THX	THX/CLO	na	na	NK S23-Z3 RR	yes	na	yes	North East Research Farm in Floyd County	IA	2	2006	Ohnesorg2009-2-2006	author spreadsheet	no-till practices were used, soybean at 76-cm row spacing and 470,000 seeds per ha	150	na	no	yes	randomized block	2006-05-06				Sampling dates are unclear from methods and results	yes	0.14	na	no insecticide	na
964	16	Ohnesorg2009	Ohnesorg, W. J., K. D. Johnson, and M. E. O'Neal.	2009	Journal of Economic Entomology	102(5): 1816-1826	Impact of reduced-risk insecticides on soybean aphid and associated natural enemies	public	crop industry/seed-chemical industry	yes	USA	North America	field	author	no	author provided seasonal means	no	soybean	soybean	IMI	IMI	0.25	na	NK S23-Z3 RR	yes	na	yes	North East Research Farm in Floyd County	IA	2	2006	Ohnesorg2009-2-2006	author spreadsheet	no-till practices were used, soybean at 76-cm row spacing and 470,000 seeds per ha	150	na	no	yes	randomized block	2006-05-06				Sampling dates are unclear from methods and results	yes	0.14	na	no insecticide	na
965	16	Ohnesorg2009	Ohnesorg, W. J., K. D. Johnson, and M. E. O'Neal.	2009	Journal of Economic Entomology	102(5): 1816-1826	Impact of reduced-risk insecticides on soybean aphid and associated natural enemies	public	crop industry/seed-chemical industry	yes	USA	North America	field	author	no	author provided seasonal means	no	soybean	soybean	THX	THX/CLO	na	na	NK S23-Z3 RR	yes	na	yes	North East Research Farm in Floyd County	IA	2	2006	Ohnesorg2009-2-2006	author spreadsheet	no-till practices were used, soybean at 76-cm row spacing and 470,000 seeds per ha	150	na	no	yes	randomized block	2006-05-06				Sampling dates are unclear from methods and results	yes	0.14	na	no insecticide	na
966	16	Ohnesorg2009	Ohnesorg, W. J., K. D. Johnson, and M. E. O'Neal.	2009	Journal of Economic Entomology	102(5): 1816-1826	Impact of reduced-risk insecticides on soybean aphid and associated natural enemies	public	crop industry/seed-chemical industry	yes	USA	North America	field	author	no	author provided seasonal means	no	soybean	soybean	IMI	IMI	0.25	na	NK S23-Z3 RR	yes	na	yes	North East Research Farm in Floyd County	IA	2	2006	Ohnesorg2009-2-2006	author spreadsheet	no-till practices were used, soybean at 76-cm row spacing and 470,000 seeds per ha	150	na	no	yes	randomized block	2006-05-06				Sampling dates are unclear from methods and results	yes	0.14	na	no insecticide	na
967	16	Ohnesorg2009	Ohnesorg, W. J., K. D. Johnson, and M. E. O'Neal.	2009	Journal of Economic Entomology	102(5): 1816-1826	Impact of reduced-risk insecticides on soybean aphid and associated natural enemies	public	crop industry/seed-chemical industry	yes	USA	North America	field	author	no	author provided seasonal means	no	soybean	soybean	THX	THX/CLO	na	na	NK S23-Z3 RR	yes	na	yes	North East Research Farm in Floyd County	IA	2	2006	Ohnesorg2009-2-2006	author spreadsheet	no-till practices were used, soybean at 76-cm row spacing and 470,000 seeds per ha	150	na	no	yes	randomized block	2006-05-06				Sampling dates are unclear from methods and results	yes	0.14	na	no insecticide	na
968	16	Ohnesorg2009	Ohnesorg, W. J., K. D. Johnson, and M. E. O'Neal.	2009	Journal of Economic Entomology	102(5): 1816-1826	Impact of reduced-risk insecticides on soybean aphid and associated natural enemies	public	crop industry/seed-chemical industry	yes	USA	North America	field	author	no	author provided seasonal means	no	soybean	soybean	IMI	IMI	0.25	na	NK S24-K4 RR	yes	na	yes	North East Research Farm in Floyd County	IA	1	2005	Ohnesorg2009-1-2005	author spreadsheet	no-till practices were used, soybean at 76-cm row spacing and 470,000 seeds per ha	150	na	no	yes	randomized block	2005-05-22	2005-06-27	2005-08-24	58	Sampling dates inferred from Fig. 3	yes	0.14	7	no insecticide	na
969	16	Ohnesorg2009	Ohnesorg, W. J., K. D. Johnson, and M. E. O'Neal.	2009	Journal of Economic Entomology	102(5): 1816-1826	Impact of reduced-risk insecticides on soybean aphid and associated natural enemies	public	crop industry/seed-chemical industry	yes	USA	North America	field	author	no	author provided seasonal means	no	soybean	soybean	THX	THX/CLO	na	na	NK S24-K4 RR	yes	na	yes	North East Research Farm in Floyd County	IA	1	2005	Ohnesorg2009-1-2005	author spreadsheet	no-till practices were used, soybean at 76-cm row spacing and 470,000 seeds per ha	150	na	no	yes	randomized block	2005-05-22	2005-06-27	2005-08-24	58	Sampling dates inferred from Fig. 3	yes	0.14	7	no insecticide	na
970	16	Ohnesorg2009	Ohnesorg, W. J., K. D. Johnson, and M. E. O'Neal.	2009	Journal of Economic Entomology	102(5): 1816-1826	Impact of reduced-risk insecticides on soybean aphid and associated natural enemies	public	crop industry/seed-chemical industry	yes	USA	North America	field	author	no	author provided seasonal means	no	soybean	soybean	IMI	IMI	0.25	na	NK S24-K4 RR	yes	na	yes	North East Research Farm in Floyd County	IA	1	2005	Ohnesorg2009-1-2005	author spreadsheet	no-till practices were used, soybean at 76-cm row spacing and 470,000 seeds per ha	150	na	no	yes	randomized block	2005-05-22	2005-06-27	2005-08-24	58	Sampling dates inferred from Fig. 3	yes	0.14	7	no insecticide	na
971	16	Ohnesorg2009	Ohnesorg, W. J., K. D. Johnson, and M. E. O'Neal.	2009	Journal of Economic Entomology	102(5): 1816-1826	Impact of reduced-risk insecticides on soybean aphid and associated natural enemies	public	crop industry/seed-chemical industry	yes	USA	North America	field	author	no	author provided seasonal means	no	soybean	soybean	THX	THX/CLO	na	na	NK S24-K4 RR	yes	na	yes	North East Research Farm in Floyd County	IA	1	2005	Ohnesorg2009-1-2005	author spreadsheet	no-till practices were used, soybean at 76-cm row spacing and 470,000 seeds per ha	150	na	no	yes	randomized block	2005-05-22	2005-06-27	2005-08-24	58	Sampling dates inferred from Fig. 3	yes	0.14	7	no insecticide	na
972	16	Ohnesorg2009	Ohnesorg, W. J., K. D. Johnson, and M. E. O'Neal.	2009	Journal of Economic Entomology	102(5): 1816-1826	Impact of reduced-risk insecticides on soybean aphid and associated natural enemies	public	crop industry/seed-chemical industry	yes	USA	North America	field	author	no	author provided seasonal means	no	soybean	soybean	IMI	IMI	0.25	na	NK S24-K4 RR	yes	na	yes	North East Research Farm in Floyd County	IA	1	2005	Ohnesorg2009-1-2005	author spreadsheet	no-till practices were used, soybean at 76-cm row spacing and 470,000 seeds per ha	150	na	no	yes	randomized block	2005-05-22	2005-06-27	2005-08-24	58	Sampling dates inferred from Fig. 3	yes	0.14	7	no insecticide	na
973	16	Ohnesorg2009	Ohnesorg, W. J., K. D. Johnson, and M. E. O'Neal.	2009	Journal of Economic Entomology	102(5): 1816-1826	Impact of reduced-risk insecticides on soybean aphid and associated natural enemies	public	crop industry/seed-chemical industry	yes	USA	North America	field	author	no	author provided seasonal means	no	soybean	soybean	THX	THX/CLO	na	na	NK S24-K4 RR	yes	na	yes	North East Research Farm in Floyd County	IA	1	2005	Ohnesorg2009-1-2005	author spreadsheet	no-till practices were used, soybean at 76-cm row spacing and 470,000 seeds per ha	150	na	no	yes	randomized block	2005-05-22	2005-06-27	2005-08-24	58	Sampling dates inferred from Fig. 3	yes	0.14	7	no insecticide	na
974	16	Ohnesorg2009	Ohnesorg, W. J., K. D. Johnson, and M. E. O'Neal.	2009	Journal of Economic Entomology	102(5): 1816-1826	Impact of reduced-risk insecticides on soybean aphid and associated natural enemies	public	crop industry/seed-chemical industry	yes	USA	North America	field	author	no	author provided seasonal means	no	soybean	soybean	IMI	IMI	0.25	na	NK S24-K4 RR	yes	na	yes	North East Research Farm in Floyd County	IA	1	2005	Ohnesorg2009-1-2005	author spreadsheet	no-till practices were used, soybean at 76-cm row spacing and 470,000 seeds per ha	150	na	no	yes	randomized block	2005-05-22	2005-06-27	2005-08-24	58	Sampling dates inferred from Fig. 3	yes	0.14	7	no insecticide	na
975	16	Ohnesorg2009	Ohnesorg, W. J., K. D. Johnson, and M. E. O'Neal.	2009	Journal of Economic Entomology	102(5): 1816-1826	Impact of reduced-risk insecticides on soybean aphid and associated natural enemies	public	crop industry/seed-chemical industry	yes	USA	North America	field	author	no	author provided seasonal means	no	soybean	soybean	THX	THX/CLO	na	na	NK S24-K4 RR	yes	na	yes	North East Research Farm in Floyd County	IA	1	2005	Ohnesorg2009-1-2005	author spreadsheet	no-till practices were used, soybean at 76-cm row spacing and 470,000 seeds per ha	150	na	no	yes	randomized block	2005-05-22	2005-06-27	2005-08-24	58	Sampling dates inferred from Fig. 3	yes	0.14	7	no insecticide	na
976	16	Ohnesorg2009	Ohnesorg, W. J., K. D. Johnson, and M. E. O'Neal.	2009	Journal of Economic Entomology	102(5): 1816-1826	Impact of reduced-risk insecticides on soybean aphid and associated natural enemies	public	crop industry/seed-chemical industry	yes	USA	North America	field	author	no	author provided seasonal means	no	soybean	soybean	IMI	IMI	0.25	na	NK S24-K4 RR	yes	na	yes	North East Research Farm in Floyd County	IA	1	2005	Ohnesorg2009-1-2005	author spreadsheet	no-till practices were used, soybean at 76-cm row spacing and 470,000 seeds per ha	150	na	no	yes	randomized block	2005-05-22	2005-06-27	2005-08-24	58	Sampling dates inferred from Fig. 3	yes	0.14	7	no insecticide	na
977	16	Ohnesorg2009	Ohnesorg, W. J., K. D. Johnson, and M. E. O'Neal.	2009	Journal of Economic Entomology	102(5): 1816-1826	Impact of reduced-risk insecticides on soybean aphid and associated natural enemies	public	crop industry/seed-chemical industry	yes	USA	North America	field	author	no	author provided seasonal means	no	soybean	soybean	THX	THX/CLO	na	na	NK S24-K4 RR	yes	na	yes	North East Research Farm in Floyd County	IA	1	2005	Ohnesorg2009-1-2005	author spreadsheet	no-till practices were used, soybean at 76-cm row spacing and 470,000 seeds per ha	150	na	no	yes	randomized block	2005-05-22	2005-06-27	2005-08-24	58	Sampling dates inferred from Fig. 3	yes	0.14	7	no insecticide	na
978	16	Ohnesorg2009	Ohnesorg, W. J., K. D. Johnson, and M. E. O'Neal.	2009	Journal of Economic Entomology	102(5): 1816-1826	Impact of reduced-risk insecticides on soybean aphid and associated natural enemies	public	crop industry/seed-chemical industry	yes	USA	North America	field	author	no	author provided seasonal means	no	soybean	soybean	IMI	IMI	0.25	na	NK S24-K4 RR	yes	na	yes	North East Research Farm in Floyd County	IA	1	2005	Ohnesorg2009-1-2005	author spreadsheet	no-till practices were used, soybean at 76-cm row spacing and 470,000 seeds per ha	150	na	no	yes	randomized block	2005-05-22	2005-06-27	2005-08-24	58	Sampling dates inferred from Fig. 3	yes	0.14	7	no insecticide	na
979	16	Ohnesorg2009	Ohnesorg, W. J., K. D. Johnson, and M. E. O'Neal.	2009	Journal of Economic Entomology	102(5): 1816-1826	Impact of reduced-risk insecticides on soybean aphid and associated natural enemies	public	crop industry/seed-chemical industry	yes	USA	North America	field	author	no	author provided seasonal means	no	soybean	soybean	THX	THX/CLO	na	na	NK S24-K4 RR	yes	na	yes	North East Research Farm in Floyd County	IA	1	2005	Ohnesorg2009-1-2005	author spreadsheet	no-till practices were used, soybean at 76-cm row spacing and 470,000 seeds per ha	150	na	no	yes	randomized block	2005-05-22	2005-06-27	2005-08-24	58	Sampling dates inferred from Fig. 3	yes	0.14	7	no insecticide	na
980	16	Ohnesorg2009	Ohnesorg, W. J., K. D. Johnson, and M. E. O'Neal.	2009	Journal of Economic Entomology	102(5): 1816-1826	Impact of reduced-risk insecticides on soybean aphid and associated natural enemies	public	crop industry/seed-chemical industry	yes	USA	North America	field	author	no	author provided seasonal means	no	soybean	soybean	IMI	IMI	0.25	na	NK S24-K4 RR	yes	na	yes	North East Research Farm in Floyd County	IA	1	2005	Ohnesorg2009-1-2005	author spreadsheet	no-till practices were used, soybean at 76-cm row spacing and 470,000 seeds per ha	150	na	no	yes	randomized block	2005-05-22	2005-06-27	2005-08-24	58	Sampling dates inferred from Fig. 3	yes	0.14	7	no insecticide	na
981	16	Ohnesorg2009	Ohnesorg, W. J., K. D. Johnson, and M. E. O'Neal.	2009	Journal of Economic Entomology	102(5): 1816-1826	Impact of reduced-risk insecticides on soybean aphid and associated natural enemies	public	crop industry/seed-chemical industry	yes	USA	North America	field	author	no	author provided seasonal means	no	soybean	soybean	THX	THX/CLO	na	na	NK S24-K4 RR	yes	na	yes	North East Research Farm in Floyd County	IA	1	2005	Ohnesorg2009-1-2005	author spreadsheet	no-till practices were used, soybean at 76-cm row spacing and 470,000 seeds per ha	150	na	no	yes	randomized block	2005-05-22	2005-06-27	2005-08-24	58	Sampling dates inferred from Fig. 3	yes	0.14	7	no insecticide	na
982	16	Ohnesorg2009	Ohnesorg, W. J., K. D. Johnson, and M. E. O'Neal.	2009	Journal of Economic Entomology	102(5): 1816-1826	Impact of reduced-risk insecticides on soybean aphid and associated natural enemies	public	crop industry/seed-chemical industry	yes	USA	North America	field	author	no	author provided seasonal means	no	soybean	soybean	IMI	IMI	0.25	na	NK S24-K4 RR	yes	na	yes	North East Research Farm in Floyd County	IA	1	2005	Ohnesorg2009-1-2005	author spreadsheet	no-till practices were used, soybean at 76-cm row spacing and 470,000 seeds per ha	150	na	no	yes	randomized block	2005-05-22	2005-06-27	2005-08-24	58	Sampling dates inferred from Fig. 3	yes	0.14	7	no insecticide	na
983	16	Ohnesorg2009	Ohnesorg, W. J., K. D. Johnson, and M. E. O'Neal.	2009	Journal of Economic Entomology	102(5): 1816-1826	Impact of reduced-risk insecticides on soybean aphid and associated natural enemies	public	crop industry/seed-chemical industry	yes	USA	North America	field	author	no	author provided seasonal means	no	soybean	soybean	THX	THX/CLO	na	na	NK S24-K4 RR	yes	na	yes	North East Research Farm in Floyd County	IA	1	2005	Ohnesorg2009-1-2005	author spreadsheet	no-till practices were used, soybean at 76-cm row spacing and 470,000 seeds per ha	150	na	no	yes	randomized block	2005-05-22	2005-06-27	2005-08-24	58	Sampling dates inferred from Fig. 3	yes	0.14	7	no insecticide	na
984	16	Ohnesorg2009	Ohnesorg, W. J., K. D. Johnson, and M. E. O'Neal.	2009	Journal of Economic Entomology	102(5): 1816-1826	Impact of reduced-risk insecticides on soybean aphid and associated natural enemies	public	crop industry/seed-chemical industry	yes	USA	North America	field	author	no	author provided seasonal means	no	soybean	soybean	IMI	IMI	0.25	na	NK S24-K4 RR	yes	na	yes	North East Research Farm in Floyd County	IA	1	2005	Ohnesorg2009-1-2005	author spreadsheet	no-till practices were used, soybean at 76-cm row spacing and 470,000 seeds per ha	150	na	no	yes	randomized block	2005-05-22	2005-06-27	2005-08-24	58	Sampling dates inferred from Fig. 3	yes	0.14	7	no insecticide	na
985	16	Ohnesorg2009	Ohnesorg, W. J., K. D. Johnson, and M. E. O'Neal.	2009	Journal of Economic Entomology	102(5): 1816-1826	Impact of reduced-risk insecticides on soybean aphid and associated natural enemies	public	crop industry/seed-chemical industry	yes	USA	North America	field	author	no	author provided seasonal means	no	soybean	soybean	THX	THX/CLO	na	na	NK S24-K4 RR	yes	na	yes	North East Research Farm in Floyd County	IA	1	2005	Ohnesorg2009-1-2005	author spreadsheet	no-till practices were used, soybean at 76-cm row spacing and 470,000 seeds per ha	150	na	no	yes	randomized block	2005-05-22	2005-06-27	2005-08-24	58	Sampling dates inferred from Fig. 3	yes	0.14	7	no insecticide	na
986	16	Ohnesorg2009	Ohnesorg, W. J., K. D. Johnson, and M. E. O'Neal.	2009	Journal of Economic Entomology	102(5): 1816-1826	Impact of reduced-risk insecticides on soybean aphid and associated natural enemies	public	crop industry/seed-chemical industry	yes	USA	North America	field	author	no	author provided seasonal means	no	soybean	soybean	IMI	IMI	0.25	na	NK S24-K4 RR	yes	na	yes	North East Research Farm in Floyd County	IA	1	2005	Ohnesorg2009-1-2005	author spreadsheet	no-till practices were used, soybean at 76-cm row spacing and 470,000 seeds per ha	150	na	no	yes	randomized block	2005-05-22	2005-06-27	2005-08-24	58	Sampling dates inferred from Fig. 3	yes	0.14	7	no insecticide	na
987	16	Ohnesorg2009	Ohnesorg, W. J., K. D. Johnson, and M. E. O'Neal.	2009	Journal of Economic Entomology	102(5): 1816-1826	Impact of reduced-risk insecticides on soybean aphid and associated natural enemies	public	crop industry/seed-chemical industry	yes	USA	North America	field	author	no	author provided seasonal means	no	soybean	soybean	THX	THX/CLO	na	na	NK S24-K4 RR	yes	na	yes	North East Research Farm in Floyd County	IA	1	2005	Ohnesorg2009-1-2005	author spreadsheet	no-till practices were used, soybean at 76-cm row spacing and 470,000 seeds per ha	150	na	no	yes	randomized block	2005-05-22	2005-06-27	2005-08-24	58	Sampling dates inferred from Fig. 3	yes	0.14	7	no insecticide	na
988	16	Ohnesorg2009	Ohnesorg, W. J., K. D. Johnson, and M. E. O'Neal.	2009	Journal of Economic Entomology	102(5): 1816-1826	Impact of reduced-risk insecticides on soybean aphid and associated natural enemies	public	crop industry/seed-chemical industry	yes	USA	North America	field	author	no	author provided seasonal means	no	soybean	soybean	IMI	IMI	0.25	na	NK S24-K4 RR	yes	na	yes	North East Research Farm in Floyd County	IA	1	2005	Ohnesorg2009-1-2005	author spreadsheet	no-till practices were used, soybean at 76-cm row spacing and 470,000 seeds per ha	150	na	no	yes	randomized block	2005-05-22	2005-06-27	2005-08-24	58	Sampling dates inferred from Fig. 3	yes	0.14	7	no insecticide	na
989	16	Ohnesorg2009	Ohnesorg, W. J., K. D. Johnson, and M. E. O'Neal.	2009	Journal of Economic Entomology	102(5): 1816-1826	Impact of reduced-risk insecticides on soybean aphid and associated natural enemies	public	crop industry/seed-chemical industry	yes	USA	North America	field	author	no	author provided seasonal means	no	soybean	soybean	THX	THX/CLO	na	na	NK S24-K4 RR	yes	na	yes	North East Research Farm in Floyd County	IA	1	2005	Ohnesorg2009-1-2005	author spreadsheet	no-till practices were used, soybean at 76-cm row spacing and 470,000 seeds per ha	150	na	no	yes	randomized block	2005-05-22	2005-06-27	2005-08-24	58	Sampling dates inferred from Fig. 3	yes	0.14	7	no insecticide	na
990	16	Ohnesorg2009	Ohnesorg, W. J., K. D. Johnson, and M. E. O'Neal.	2009	Journal of Economic Entomology	102(5): 1816-1826	Impact of reduced-risk insecticides on soybean aphid and associated natural enemies	public	crop industry/seed-chemical industry	yes	USA	North America	field	author	no	author provided seasonal means	no	soybean	soybean	IMI	IMI	0.25	na	NK S24-K4 RR	yes	na	yes	North East Research Farm in Floyd County	IA	1	2005	Ohnesorg2009-1-2005	author spreadsheet	no-till practices were used, soybean at 76-cm row spacing and 470,000 seeds per ha	150	na	no	yes	randomized block	2005-05-22	2005-06-27	2005-08-24	58	Sampling dates inferred from Fig. 3	yes	0.14	7	no insecticide	na
991	16	Ohnesorg2009	Ohnesorg, W. J., K. D. Johnson, and M. E. O'Neal.	2009	Journal of Economic Entomology	102(5): 1816-1826	Impact of reduced-risk insecticides on soybean aphid and associated natural enemies	public	crop industry/seed-chemical industry	yes	USA	North America	field	author	no	author provided seasonal means	no	soybean	soybean	THX	THX/CLO	na	na	NK S24-K4 RR	yes	na	yes	North East Research Farm in Floyd County	IA	1	2005	Ohnesorg2009-1-2005	author spreadsheet	no-till practices were used, soybean at 76-cm row spacing and 470,000 seeds per ha	150	na	no	yes	randomized block	2005-05-22	2005-06-27	2005-08-24	58	Sampling dates inferred from Fig. 3	yes	0.14	7	no insecticide	na
992	16	Ohnesorg2009	Ohnesorg, W. J., K. D. Johnson, and M. E. O'Neal.	2009	Journal of Economic Entomology	102(5): 1816-1826	Impact of reduced-risk insecticides on soybean aphid and associated natural enemies	public	crop industry/seed-chemical industry	yes	USA	North America	field	author	no	author provided seasonal means	no	soybean	soybean	IMI	IMI	0.25	na	NK S24-K4 RR	yes	na	yes	North East Research Farm in Floyd County	IA	1	2005	Ohnesorg2009-1-2005	author spreadsheet	no-till practices were used, soybean at 76-cm row spacing and 470,000 seeds per ha	150	na	no	yes	randomized block	2005-05-22	2005-06-27	2005-08-24	58	Sampling dates inferred from Fig. 3	yes	0.14	7	no insecticide	na
993	16	Ohnesorg2009	Ohnesorg, W. J., K. D. Johnson, and M. E. O'Neal.	2009	Journal of Economic Entomology	102(5): 1816-1826	Impact of reduced-risk insecticides on soybean aphid and associated natural enemies	public	crop industry/seed-chemical industry	yes	USA	North America	field	author	no	author provided seasonal means	no	soybean	soybean	THX	THX/CLO	na	na	NK S24-K4 RR	yes	na	yes	North East Research Farm in Floyd County	IA	1	2005	Ohnesorg2009-1-2005	author spreadsheet	no-till practices were used, soybean at 76-cm row spacing and 470,000 seeds per ha	150	na	no	yes	randomized block	2005-05-22	2005-06-27	2005-08-24	58	Sampling dates inferred from Fig. 3	yes	0.14	7	no insecticide	na
994	16	Ohnesorg2009	Ohnesorg, W. J., K. D. Johnson, and M. E. O'Neal.	2009	Journal of Economic Entomology	102(5): 1816-1826	Impact of reduced-risk insecticides on soybean aphid and associated natural enemies	public	crop industry/seed-chemical industry	yes	USA	North America	field	author	no	author provided seasonal means	no	soybean	soybean	IMI	IMI	0.25	na	NK S24-K4 RR	yes	na	yes	North East Research Farm in Floyd County	IA	1	2005	Ohnesorg2009-1-2005	author spreadsheet	no-till practices were used, soybean at 76-cm row spacing and 470,000 seeds per ha	150	na	no	yes	randomized block	2005-05-22	2005-06-27	2005-08-24	58	Sampling dates inferred from Fig. 3	yes	0.14	7	no insecticide	na
995	16	Ohnesorg2009	Ohnesorg, W. J., K. D. Johnson, and M. E. O'Neal.	2009	Journal of Economic Entomology	102(5): 1816-1826	Impact of reduced-risk insecticides on soybean aphid and associated natural enemies	public	crop industry/seed-chemical industry	yes	USA	North America	field	author	no	author provided seasonal means	no	soybean	soybean	THX	THX/CLO	na	na	NK S24-K4 RR	yes	na	yes	North East Research Farm in Floyd County	IA	1	2005	Ohnesorg2009-1-2005	author spreadsheet	no-till practices were used, soybean at 76-cm row spacing and 470,000 seeds per ha	150	na	no	yes	randomized block	2005-05-22	2005-06-27	2005-08-24	58	Sampling dates inferred from Fig. 3	yes	0.14	7	no insecticide	na
996	16	Ohnesorg2009	Ohnesorg, W. J., K. D. Johnson, and M. E. O'Neal.	2009	Journal of Economic Entomology	102(5): 1816-1826	Impact of reduced-risk insecticides on soybean aphid and associated natural enemies	public	crop industry/seed-chemical industry	yes	USA	North America	field	author	no	author provided seasonal means	no	soybean	soybean	IMI	IMI	0.25	na	NK S24-K4 RR	yes	na	yes	North East Research Farm in Floyd County	IA	1	2005	Ohnesorg2009-1-2005	author spreadsheet	no-till practices were used, soybean at 76-cm row spacing and 470,000 seeds per ha	150	na	no	yes	randomized block	2005-05-22	2005-06-27	2005-08-24	58	Sampling dates inferred from Fig. 3	yes	0.14	7	no insecticide	na
997	16	Ohnesorg2009	Ohnesorg, W. J., K. D. Johnson, and M. E. O'Neal.	2009	Journal of Economic Entomology	102(5): 1816-1826	Impact of reduced-risk insecticides on soybean aphid and associated natural enemies	public	crop industry/seed-chemical industry	yes	USA	North America	field	author	no	author provided seasonal means	no	soybean	soybean	THX	THX/CLO	na	na	NK S24-K4 RR	yes	na	yes	North East Research Farm in Floyd County	IA	1	2005	Ohnesorg2009-1-2005	author spreadsheet	no-till practices were used, soybean at 76-cm row spacing and 470,000 seeds per ha	150	na	no	yes	randomized block	2005-05-22	2005-06-27	2005-08-24	58	Sampling dates inferred from Fig. 3	yes	0.14	7	no insecticide	na
998	16	Ohnesorg2009	Ohnesorg, W. J., K. D. Johnson, and M. E. O'Neal.	2009	Journal of Economic Entomology	102(5): 1816-1826	Impact of reduced-risk insecticides on soybean aphid and associated natural enemies	public	crop industry/seed-chemical industry	yes	USA	North America	field	author	no	author provided seasonal means	no	soybean	soybean	IMI	IMI	0.25	na	NK S24-K4 RR	yes	na	yes	North East Research Farm in Floyd County	IA	1	2005	Ohnesorg2009-1-2005	author spreadsheet	no-till practices were used, soybean at 76-cm row spacing and 470,000 seeds per ha	150	na	no	yes	randomized block	2005-05-22	2005-06-27	2005-08-24	58	Sampling dates inferred from Fig. 3	yes	0.14	7	no insecticide	na
999	16	Ohnesorg2009	Ohnesorg, W. J., K. D. Johnson, and M. E. O'Neal.	2009	Journal of Economic Entomology	102(5): 1816-1826	Impact of reduced-risk insecticides on soybean aphid and associated natural enemies	public	crop industry/seed-chemical industry	yes	USA	North America	field	author	no	author provided seasonal means	no	soybean	soybean	THX	THX/CLO	na	na	NK S24-K4 RR	yes	na	yes	North East Research Farm in Floyd County	IA	1	2005	Ohnesorg2009-1-2005	author spreadsheet	no-till practices were used, soybean at 76-cm row spacing and 470,000 seeds per ha	150	na	no	yes	randomized block	2005-05-22	2005-06-27	2005-08-24	58	Sampling dates inferred from Fig. 3	yes	0.14	7	no insecticide	na
1000	16	Ohnesorg2009	Ohnesorg, W. J., K. D. Johnson, and M. E. O'Neal.	2009	Journal of Economic Entomology	102(5): 1816-1826	Impact of reduced-risk insecticides on soybean aphid and associated natural enemies	public	crop industry/seed-chemical industry	yes	USA	North America	field	author	no	author provided seasonal means	no	soybean	soybean	IMI	IMI	0.25	na	NK S24-K4 RR	yes	na	yes	North East Research Farm in Floyd County	IA	1	2005	Ohnesorg2009-1-2005	author spreadsheet	no-till practices were used, soybean at 76-cm row spacing and 470,000 seeds per ha	150	na	no	yes	randomized block	2005-05-22	2005-06-27	2005-08-24	58	Sampling dates inferred from Fig. 3	yes	0.14	7	no insecticide	na
1001	16	Ohnesorg2009	Ohnesorg, W. J., K. D. Johnson, and M. E. O'Neal.	2009	Journal of Economic Entomology	102(5): 1816-1826	Impact of reduced-risk insecticides on soybean aphid and associated natural enemies	public	crop industry/seed-chemical industry	yes	USA	North America	field	author	no	author provided seasonal means	no	soybean	soybean	THX	THX/CLO	na	na	NK S24-K4 RR	yes	na	yes	North East Research Farm in Floyd County	IA	1	2005	Ohnesorg2009-1-2005	author spreadsheet	no-till practices were used, soybean at 76-cm row spacing and 470,000 seeds per ha	150	na	no	yes	randomized block	2005-05-22	2005-06-27	2005-08-24	58	Sampling dates inferred from Fig. 3	yes	0.14	7	no insecticide	na
1002	16	Ohnesorg2009	Ohnesorg, W. J., K. D. Johnson, and M. E. O'Neal.	2009	Journal of Economic Entomology	102(5): 1816-1826	Impact of reduced-risk insecticides on soybean aphid and associated natural enemies	public	crop industry/seed-chemical industry	yes	USA	North America	field	author	no	author provided seasonal means	no	soybean	soybean	IMI	IMI	0.25	na	NK S24-K4 RR	yes	na	yes	North East Research Farm in Floyd County	IA	1	2005	Ohnesorg2009-1-2005	author spreadsheet	no-till practices were used, soybean at 76-cm row spacing and 470,000 seeds per ha	150	na	no	yes	randomized block	2005-05-22	2005-06-27	2005-08-24	58	Sampling dates inferred from Fig. 3	yes	0.14	7	no insecticide	na
1003	16	Ohnesorg2009	Ohnesorg, W. J., K. D. Johnson, and M. E. O'Neal.	2009	Journal of Economic Entomology	102(5): 1816-1826	Impact of reduced-risk insecticides on soybean aphid and associated natural enemies	public	crop industry/seed-chemical industry	yes	USA	North America	field	author	no	author provided seasonal means	no	soybean	soybean	THX	THX/CLO	na	na	NK S24-K4 RR	yes	na	yes	North East Research Farm in Floyd County	IA	1	2005	Ohnesorg2009-1-2005	author spreadsheet	no-till practices were used, soybean at 76-cm row spacing and 470,000 seeds per ha	150	na	no	yes	randomized block	2005-05-22	2005-06-27	2005-08-24	58	Sampling dates inferred from Fig. 3	yes	0.14	7	no insecticide	na
1004	16	Ohnesorg2009	Ohnesorg, W. J., K. D. Johnson, and M. E. O'Neal.	2009	Journal of Economic Entomology	102(5): 1816-1826	Impact of reduced-risk insecticides on soybean aphid and associated natural enemies	public	crop industry/seed-chemical industry	yes	USA	North America	field	author	no	author provided seasonal means	no	soybean	soybean	IMI	IMI	0.25	na	NK S24-K4 RR	yes	na	yes	North East Research Farm in Floyd County	IA	2	2006	Ohnesorg2009-2-2006	author spreadsheet	no-till practices were used, soybean at 76-cm row spacing and 470,000 seeds per ha	150	na	no	yes	randomized block	2006-05-06	2006-06-26	2006-08-22	57	Sampling dates inferred from Fig. 3	yes	0.14	7	no insecticide	na
1005	16	Ohnesorg2009	Ohnesorg, W. J., K. D. Johnson, and M. E. O'Neal.	2009	Journal of Economic Entomology	102(5): 1816-1826	Impact of reduced-risk insecticides on soybean aphid and associated natural enemies	public	crop industry/seed-chemical industry	yes	USA	North America	field	author	no	author provided seasonal means	no	soybean	soybean	THX	THX/CLO	na	na	NK S24-K4 RR	yes	na	yes	North East Research Farm in Floyd County	IA	2	2006	Ohnesorg2009-2-2006	author spreadsheet	no-till practices were used, soybean at 76-cm row spacing and 470,000 seeds per ha	150	na	no	yes	randomized block	2006-05-06	2006-06-26	2006-08-22	57	Sampling dates inferred from Fig. 3	yes	0.14	7	no insecticide	na
1006	16	Ohnesorg2009	Ohnesorg, W. J., K. D. Johnson, and M. E. O'Neal.	2009	Journal of Economic Entomology	102(5): 1816-1826	Impact of reduced-risk insecticides on soybean aphid and associated natural enemies	public	crop industry/seed-chemical industry	yes	USA	North America	field	author	no	author provided seasonal means	no	soybean	soybean	IMI	IMI	0.25	na	NK S24-K4 RR	yes	na	yes	North East Research Farm in Floyd County	IA	2	2006	Ohnesorg2009-2-2006	author spreadsheet	no-till practices were used, soybean at 76-cm row spacing and 470,000 seeds per ha	150	na	no	yes	randomized block	2006-05-06	2006-06-26	2006-08-22	57	Sampling dates inferred from Fig. 3	yes	0.14	7	no insecticide	na
1007	16	Ohnesorg2009	Ohnesorg, W. J., K. D. Johnson, and M. E. O'Neal.	2009	Journal of Economic Entomology	102(5): 1816-1826	Impact of reduced-risk insecticides on soybean aphid and associated natural enemies	public	crop industry/seed-chemical industry	yes	USA	North America	field	author	no	author provided seasonal means	no	soybean	soybean	THX	THX/CLO	na	na	NK S24-K4 RR	yes	na	yes	North East Research Farm in Floyd County	IA	2	2006	Ohnesorg2009-2-2006	author spreadsheet	no-till practices were used, soybean at 76-cm row spacing and 470,000 seeds per ha	150	na	no	yes	randomized block	2006-05-06	2006-06-26	2006-08-22	57	Sampling dates inferred from Fig. 3	yes	0.14	7	no insecticide	na
1008	16	Ohnesorg2009	Ohnesorg, W. J., K. D. Johnson, and M. E. O'Neal.	2009	Journal of Economic Entomology	102(5): 1816-1826	Impact of reduced-risk insecticides on soybean aphid and associated natural enemies	public	crop industry/seed-chemical industry	yes	USA	North America	field	author	no	author provided seasonal means	no	soybean	soybean	IMI	IMI	0.25	na	NK S24-K4 RR	yes	na	yes	North East Research Farm in Floyd County	IA	2	2006	Ohnesorg2009-2-2006	author spreadsheet	no-till practices were used, soybean at 76-cm row spacing and 470,000 seeds per ha	150	na	no	yes	randomized block	2006-05-06	2006-06-26	2006-08-22	57	Sampling dates inferred from Fig. 3	yes	0.14	7	no insecticide	na
1009	16	Ohnesorg2009	Ohnesorg, W. J., K. D. Johnson, and M. E. O'Neal.	2009	Journal of Economic Entomology	102(5): 1816-1826	Impact of reduced-risk insecticides on soybean aphid and associated natural enemies	public	crop industry/seed-chemical industry	yes	USA	North America	field	author	no	author provided seasonal means	no	soybean	soybean	THX	THX/CLO	na	na	NK S24-K4 RR	yes	na	yes	North East Research Farm in Floyd County	IA	2	2006	Ohnesorg2009-2-2006	author spreadsheet	no-till practices were used, soybean at 76-cm row spacing and 470,000 seeds per ha	150	na	no	yes	randomized block	2006-05-06	2006-06-26	2006-08-22	57	Sampling dates inferred from Fig. 3	yes	0.14	7	no insecticide	na
1010	16	Ohnesorg2009	Ohnesorg, W. J., K. D. Johnson, and M. E. O'Neal.	2009	Journal of Economic Entomology	102(5): 1816-1826	Impact of reduced-risk insecticides on soybean aphid and associated natural enemies	public	crop industry/seed-chemical industry	yes	USA	North America	field	author	no	author provided seasonal means	no	soybean	soybean	IMI	IMI	0.25	na	NK S24-K4 RR	yes	na	yes	North East Research Farm in Floyd County	IA	2	2006	Ohnesorg2009-2-2006	author spreadsheet	no-till practices were used, soybean at 76-cm row spacing and 470,000 seeds per ha	150	na	no	yes	randomized block	2006-05-06	2006-06-26	2006-08-22	57	Sampling dates inferred from Fig. 3	yes	0.14	7	no insecticide	na
1011	16	Ohnesorg2009	Ohnesorg, W. J., K. D. Johnson, and M. E. O'Neal.	2009	Journal of Economic Entomology	102(5): 1816-1826	Impact of reduced-risk insecticides on soybean aphid and associated natural enemies	public	crop industry/seed-chemical industry	yes	USA	North America	field	author	no	author provided seasonal means	no	soybean	soybean	THX	THX/CLO	na	na	NK S24-K4 RR	yes	na	yes	North East Research Farm in Floyd County	IA	2	2006	Ohnesorg2009-2-2006	author spreadsheet	no-till practices were used, soybean at 76-cm row spacing and 470,000 seeds per ha	150	na	no	yes	randomized block	2006-05-06	2006-06-26	2006-08-22	57	Sampling dates inferred from Fig. 3	yes	0.14	7	no insecticide	na
1012	16	Ohnesorg2009	Ohnesorg, W. J., K. D. Johnson, and M. E. O'Neal.	2009	Journal of Economic Entomology	102(5): 1816-1826	Impact of reduced-risk insecticides on soybean aphid and associated natural enemies	public	crop industry/seed-chemical industry	yes	USA	North America	field	author	no	author provided seasonal means	no	soybean	soybean	IMI	IMI	0.25	na	NK S24-K4 RR	yes	na	yes	North East Research Farm in Floyd County	IA	2	2006	Ohnesorg2009-2-2006	author spreadsheet	no-till practices were used, soybean at 76-cm row spacing and 470,000 seeds per ha	150	na	no	yes	randomized block	2006-05-06	2006-06-26	2006-08-22	57	Sampling dates inferred from Fig. 3	yes	0.14	7	no insecticide	na
1013	16	Ohnesorg2009	Ohnesorg, W. J., K. D. Johnson, and M. E. O'Neal.	2009	Journal of Economic Entomology	102(5): 1816-1826	Impact of reduced-risk insecticides on soybean aphid and associated natural enemies	public	crop industry/seed-chemical industry	yes	USA	North America	field	author	no	author provided seasonal means	no	soybean	soybean	THX	THX/CLO	na	na	NK S24-K4 RR	yes	na	yes	North East Research Farm in Floyd County	IA	2	2006	Ohnesorg2009-2-2006	author spreadsheet	no-till practices were used, soybean at 76-cm row spacing and 470,000 seeds per ha	150	na	no	yes	randomized block	2006-05-06	2006-06-26	2006-08-22	57	Sampling dates inferred from Fig. 3	yes	0.14	7	no insecticide	na
1014	16	Ohnesorg2009	Ohnesorg, W. J., K. D. Johnson, and M. E. O'Neal.	2009	Journal of Economic Entomology	102(5): 1816-1826	Impact of reduced-risk insecticides on soybean aphid and associated natural enemies	public	crop industry/seed-chemical industry	yes	USA	North America	field	author	no	author provided seasonal means	no	soybean	soybean	IMI	IMI	0.25	na	NK S24-K4 RR	yes	na	yes	North East Research Farm in Floyd County	IA	2	2006	Ohnesorg2009-2-2006	author spreadsheet	no-till practices were used, soybean at 76-cm row spacing and 470,000 seeds per ha	150	na	no	yes	randomized block	2006-05-06	2006-06-26	2006-08-22	57	Sampling dates inferred from Fig. 3	yes	0.14	7	no insecticide	na
1015	16	Ohnesorg2009	Ohnesorg, W. J., K. D. Johnson, and M. E. O'Neal.	2009	Journal of Economic Entomology	102(5): 1816-1826	Impact of reduced-risk insecticides on soybean aphid and associated natural enemies	public	crop industry/seed-chemical industry	yes	USA	North America	field	author	no	author provided seasonal means	no	soybean	soybean	THX	THX/CLO	na	na	NK S24-K4 RR	yes	na	yes	North East Research Farm in Floyd County	IA	2	2006	Ohnesorg2009-2-2006	author spreadsheet	no-till practices were used, soybean at 76-cm row spacing and 470,000 seeds per ha	150	na	no	yes	randomized block	2006-05-06	2006-06-26	2006-08-22	57	Sampling dates inferred from Fig. 3	yes	0.14	7	no insecticide	na
1016	16	Ohnesorg2009	Ohnesorg, W. J., K. D. Johnson, and M. E. O'Neal.	2009	Journal of Economic Entomology	102(5): 1816-1826	Impact of reduced-risk insecticides on soybean aphid and associated natural enemies	public	crop industry/seed-chemical industry	yes	USA	North America	field	author	no	author provided seasonal means	no	soybean	soybean	IMI	IMI	0.25	na	NK S24-K4 RR	yes	na	yes	North East Research Farm in Floyd County	IA	2	2006	Ohnesorg2009-2-2006	author spreadsheet	no-till practices were used, soybean at 76-cm row spacing and 470,000 seeds per ha	150	na	no	yes	randomized block	2006-05-06	2006-06-26	2006-08-22	57	Sampling dates inferred from Fig. 3	yes	0.14	7	no insecticide	na
1017	16	Ohnesorg2009	Ohnesorg, W. J., K. D. Johnson, and M. E. O'Neal.	2009	Journal of Economic Entomology	102(5): 1816-1826	Impact of reduced-risk insecticides on soybean aphid and associated natural enemies	public	crop industry/seed-chemical industry	yes	USA	North America	field	author	no	author provided seasonal means	no	soybean	soybean	THX	THX/CLO	na	na	NK S24-K4 RR	yes	na	yes	North East Research Farm in Floyd County	IA	2	2006	Ohnesorg2009-2-2006	author spreadsheet	no-till practices were used, soybean at 76-cm row spacing and 470,000 seeds per ha	150	na	no	yes	randomized block	2006-05-06	2006-06-26	2006-08-22	57	Sampling dates inferred from Fig. 3	yes	0.14	7	no insecticide	na
1018	16	Ohnesorg2009	Ohnesorg, W. J., K. D. Johnson, and M. E. O'Neal.	2009	Journal of Economic Entomology	102(5): 1816-1826	Impact of reduced-risk insecticides on soybean aphid and associated natural enemies	public	crop industry/seed-chemical industry	yes	USA	North America	field	author	no	author provided seasonal means	no	soybean	soybean	IMI	IMI	0.25	na	NK S24-K4 RR	yes	na	yes	North East Research Farm in Floyd County	IA	2	2006	Ohnesorg2009-2-2006	author spreadsheet	no-till practices were used, soybean at 76-cm row spacing and 470,000 seeds per ha	150	na	no	yes	randomized block	2006-05-06	2006-06-26	2006-08-22	57	Sampling dates inferred from Fig. 3	yes	0.14	7	no insecticide	na
1019	16	Ohnesorg2009	Ohnesorg, W. J., K. D. Johnson, and M. E. O'Neal.	2009	Journal of Economic Entomology	102(5): 1816-1826	Impact of reduced-risk insecticides on soybean aphid and associated natural enemies	public	crop industry/seed-chemical industry	yes	USA	North America	field	author	no	author provided seasonal means	no	soybean	soybean	THX	THX/CLO	na	na	NK S24-K4 RR	yes	na	yes	North East Research Farm in Floyd County	IA	2	2006	Ohnesorg2009-2-2006	author spreadsheet	no-till practices were used, soybean at 76-cm row spacing and 470,000 seeds per ha	150	na	no	yes	randomized block	2006-05-06	2006-06-26	2006-08-22	57	Sampling dates inferred from Fig. 3	yes	0.14	7	no insecticide	na
1020	16	Ohnesorg2009	Ohnesorg, W. J., K. D. Johnson, and M. E. O'Neal.	2009	Journal of Economic Entomology	102(5): 1816-1826	Impact of reduced-risk insecticides on soybean aphid and associated natural enemies	public	crop industry/seed-chemical industry	yes	USA	North America	field	author	no	author provided seasonal means	no	soybean	soybean	IMI	IMI	0.25	na	NK S24-K4 RR	yes	na	yes	North East Research Farm in Floyd County	IA	2	2006	Ohnesorg2009-2-2006	author spreadsheet	no-till practices were used, soybean at 76-cm row spacing and 470,000 seeds per ha	150	na	no	yes	randomized block	2006-05-06	2006-06-26	2006-08-22	57	Sampling dates inferred from Fig. 3	yes	0.14	7	no insecticide	na
1021	16	Ohnesorg2009	Ohnesorg, W. J., K. D. Johnson, and M. E. O'Neal.	2009	Journal of Economic Entomology	102(5): 1816-1826	Impact of reduced-risk insecticides on soybean aphid and associated natural enemies	public	crop industry/seed-chemical industry	yes	USA	North America	field	author	no	author provided seasonal means	no	soybean	soybean	THX	THX/CLO	na	na	NK S24-K4 RR	yes	na	yes	North East Research Farm in Floyd County	IA	2	2006	Ohnesorg2009-2-2006	author spreadsheet	no-till practices were used, soybean at 76-cm row spacing and 470,000 seeds per ha	150	na	no	yes	randomized block	2006-05-06	2006-06-26	2006-08-22	57	Sampling dates inferred from Fig. 3	yes	0.14	7	no insecticide	na
1022	16	Ohnesorg2009	Ohnesorg, W. J., K. D. Johnson, and M. E. O'Neal.	2009	Journal of Economic Entomology	102(5): 1816-1826	Impact of reduced-risk insecticides on soybean aphid and associated natural enemies	public	crop industry/seed-chemical industry	yes	USA	North America	field	author	no	author provided seasonal means	no	soybean	soybean	IMI	IMI	0.25	na	NK S24-K4 RR	yes	na	yes	North East Research Farm in Floyd County	IA	2	2006	Ohnesorg2009-2-2006	author spreadsheet	no-till practices were used, soybean at 76-cm row spacing and 470,000 seeds per ha	150	na	no	yes	randomized block	2006-05-06	2006-06-26	2006-08-22	57	Sampling dates inferred from Fig. 3	yes	0.14	7	no insecticide	na
1023	16	Ohnesorg2009	Ohnesorg, W. J., K. D. Johnson, and M. E. O'Neal.	2009	Journal of Economic Entomology	102(5): 1816-1826	Impact of reduced-risk insecticides on soybean aphid and associated natural enemies	public	crop industry/seed-chemical industry	yes	USA	North America	field	author	no	author provided seasonal means	no	soybean	soybean	THX	THX/CLO	na	na	NK S24-K4 RR	yes	na	yes	North East Research Farm in Floyd County	IA	2	2006	Ohnesorg2009-2-2006	author spreadsheet	no-till practices were used, soybean at 76-cm row spacing and 470,000 seeds per ha	150	na	no	yes	randomized block	2006-05-06	2006-06-26	2006-08-22	57	Sampling dates inferred from Fig. 3	yes	0.14	7	no insecticide	na
1024	16	Ohnesorg2009	Ohnesorg, W. J., K. D. Johnson, and M. E. O'Neal.	2009	Journal of Economic Entomology	102(5): 1816-1826	Impact of reduced-risk insecticides on soybean aphid and associated natural enemies	public	crop industry/seed-chemical industry	yes	USA	North America	field	author	no	author provided seasonal means	no	soybean	soybean	IMI	IMI	0.25	na	NK S24-K4 RR	yes	na	yes	North East Research Farm in Floyd County	IA	2	2006	Ohnesorg2009-2-2006	author spreadsheet	no-till practices were used, soybean at 76-cm row spacing and 470,000 seeds per ha	150	na	no	yes	randomized block	2006-05-06	2006-06-26	2006-08-22	57	Sampling dates inferred from Fig. 3	yes	0.14	7	no insecticide	na
1025	16	Ohnesorg2009	Ohnesorg, W. J., K. D. Johnson, and M. E. O'Neal.	2009	Journal of Economic Entomology	102(5): 1816-1826	Impact of reduced-risk insecticides on soybean aphid and associated natural enemies	public	crop industry/seed-chemical industry	yes	USA	North America	field	author	no	author provided seasonal means	no	soybean	soybean	THX	THX/CLO	na	na	NK S24-K4 RR	yes	na	yes	North East Research Farm in Floyd County	IA	2	2006	Ohnesorg2009-2-2006	author spreadsheet	no-till practices were used, soybean at 76-cm row spacing and 470,000 seeds per ha	150	na	no	yes	randomized block	2006-05-06	2006-06-26	2006-08-22	57	Sampling dates inferred from Fig. 3	yes	0.14	7	no insecticide	na
1026	16	Ohnesorg2009	Ohnesorg, W. J., K. D. Johnson, and M. E. O'Neal.	2009	Journal of Economic Entomology	102(5): 1816-1826	Impact of reduced-risk insecticides on soybean aphid and associated natural enemies	public	crop industry/seed-chemical industry	yes	USA	North America	field	author	no	author provided seasonal means	no	soybean	soybean	IMI	IMI	0.25	na	NK S24-K4 RR	yes	na	yes	North East Research Farm in Floyd County	IA	2	2006	Ohnesorg2009-2-2006	author spreadsheet	no-till practices were used, soybean at 76-cm row spacing and 470,000 seeds per ha	150	na	no	yes	randomized block	2006-05-06	2006-06-26	2006-08-22	57	Sampling dates inferred from Fig. 3	yes	0.14	7	no insecticide	na
1027	16	Ohnesorg2009	Ohnesorg, W. J., K. D. Johnson, and M. E. O'Neal.	2009	Journal of Economic Entomology	102(5): 1816-1826	Impact of reduced-risk insecticides on soybean aphid and associated natural enemies	public	crop industry/seed-chemical industry	yes	USA	North America	field	author	no	author provided seasonal means	no	soybean	soybean	THX	THX/CLO	na	na	NK S24-K4 RR	yes	na	yes	North East Research Farm in Floyd County	IA	2	2006	Ohnesorg2009-2-2006	author spreadsheet	no-till practices were used, soybean at 76-cm row spacing and 470,000 seeds per ha	150	na	no	yes	randomized block	2006-05-06	2006-06-26	2006-08-22	57	Sampling dates inferred from Fig. 3	yes	0.14	7	no insecticide	na
1028	16	Ohnesorg2009	Ohnesorg, W. J., K. D. Johnson, and M. E. O'Neal.	2009	Journal of Economic Entomology	102(5): 1816-1826	Impact of reduced-risk insecticides on soybean aphid and associated natural enemies	public	crop industry/seed-chemical industry	yes	USA	North America	field	author	no	author provided seasonal means	no	soybean	soybean	IMI	IMI	0.25	na	NK S24-K4 RR	yes	na	yes	North East Research Farm in Floyd County	IA	2	2006	Ohnesorg2009-2-2006	author spreadsheet	no-till practices were used, soybean at 76-cm row spacing and 470,000 seeds per ha	150	na	no	yes	randomized block	2006-05-06	2006-06-26	2006-08-22	57	Sampling dates inferred from Fig. 3	yes	0.14	7	no insecticide	na
1029	16	Ohnesorg2009	Ohnesorg, W. J., K. D. Johnson, and M. E. O'Neal.	2009	Journal of Economic Entomology	102(5): 1816-1826	Impact of reduced-risk insecticides on soybean aphid and associated natural enemies	public	crop industry/seed-chemical industry	yes	USA	North America	field	author	no	author provided seasonal means	no	soybean	soybean	THX	THX/CLO	na	na	NK S24-K4 RR	yes	na	yes	North East Research Farm in Floyd County	IA	2	2006	Ohnesorg2009-2-2006	author spreadsheet	no-till practices were used, soybean at 76-cm row spacing and 470,000 seeds per ha	150	na	no	yes	randomized block	2006-05-06	2006-06-26	2006-08-22	57	Sampling dates inferred from Fig. 3	yes	0.14	7	no insecticide	na
1030	16	Ohnesorg2009	Ohnesorg, W. J., K. D. Johnson, and M. E. O'Neal.	2009	Journal of Economic Entomology	102(5): 1816-1826	Impact of reduced-risk insecticides on soybean aphid and associated natural enemies	public	crop industry/seed-chemical industry	yes	USA	North America	field	author	no	author provided seasonal means	no	soybean	soybean	IMI	IMI	0.25	na	NK S24-K4 RR	yes	na	yes	North East Research Farm in Floyd County	IA	2	2006	Ohnesorg2009-2-2006	author spreadsheet	no-till practices were used, soybean at 76-cm row spacing and 470,000 seeds per ha	150	na	no	yes	randomized block	2006-05-06	2006-06-26	2006-08-22	57	Sampling dates inferred from Fig. 3	yes	0.14	7	no insecticide	na
1031	16	Ohnesorg2009	Ohnesorg, W. J., K. D. Johnson, and M. E. O'Neal.	2009	Journal of Economic Entomology	102(5): 1816-1826	Impact of reduced-risk insecticides on soybean aphid and associated natural enemies	public	crop industry/seed-chemical industry	yes	USA	North America	field	author	no	author provided seasonal means	no	soybean	soybean	THX	THX/CLO	na	na	NK S24-K4 RR	yes	na	yes	North East Research Farm in Floyd County	IA	2	2006	Ohnesorg2009-2-2006	author spreadsheet	no-till practices were used, soybean at 76-cm row spacing and 470,000 seeds per ha	150	na	no	yes	randomized block	2006-05-06	2006-06-26	2006-08-22	57	Sampling dates inferred from Fig. 3	yes	0.14	7	no insecticide	na
1032	16	Ohnesorg2009	Ohnesorg, W. J., K. D. Johnson, and M. E. O'Neal.	2009	Journal of Economic Entomology	102(5): 1816-1826	Impact of reduced-risk insecticides on soybean aphid and associated natural enemies	public	crop industry/seed-chemical industry	yes	USA	North America	field	author	no	author provided seasonal means	no	soybean	soybean	IMI	IMI	0.25	na	NK S24-K4 RR	yes	na	yes	North East Research Farm in Floyd County	IA	2	2006	Ohnesorg2009-2-2006	author spreadsheet	no-till practices were used, soybean at 76-cm row spacing and 470,000 seeds per ha	150	na	no	yes	randomized block	2006-05-06	2006-06-26	2006-08-22	57	Sampling dates inferred from Fig. 3	yes	0.14	7	no insecticide	na
1033	16	Ohnesorg2009	Ohnesorg, W. J., K. D. Johnson, and M. E. O'Neal.	2009	Journal of Economic Entomology	102(5): 1816-1826	Impact of reduced-risk insecticides on soybean aphid and associated natural enemies	public	crop industry/seed-chemical industry	yes	USA	North America	field	author	no	author provided seasonal means	no	soybean	soybean	THX	THX/CLO	na	na	NK S24-K4 RR	yes	na	yes	North East Research Farm in Floyd County	IA	2	2006	Ohnesorg2009-2-2006	author spreadsheet	no-till practices were used, soybean at 76-cm row spacing and 470,000 seeds per ha	150	na	no	yes	randomized block	2006-05-06	2006-06-26	2006-08-22	57	Sampling dates inferred from Fig. 3	yes	0.14	7	no insecticide	na
1034	16	Ohnesorg2009	Ohnesorg, W. J., K. D. Johnson, and M. E. O'Neal.	2009	Journal of Economic Entomology	102(5): 1816-1826	Impact of reduced-risk insecticides on soybean aphid and associated natural enemies	public	crop industry/seed-chemical industry	yes	USA	North America	field	author	no	author provided seasonal means	no	soybean	soybean	IMI	IMI	0.25	na	NK S24-K4 RR	yes	na	yes	North East Research Farm in Floyd County	IA	2	2006	Ohnesorg2009-2-2006	author spreadsheet	no-till practices were used, soybean at 76-cm row spacing and 470,000 seeds per ha	150	na	no	yes	randomized block	2006-05-06	2006-06-26	2006-08-22	57	Sampling dates inferred from Fig. 3	yes	0.14	7	no insecticide	na
1035	16	Ohnesorg2009	Ohnesorg, W. J., K. D. Johnson, and M. E. O'Neal.	2009	Journal of Economic Entomology	102(5): 1816-1826	Impact of reduced-risk insecticides on soybean aphid and associated natural enemies	public	crop industry/seed-chemical industry	yes	USA	North America	field	author	no	author provided seasonal means	no	soybean	soybean	THX	THX/CLO	na	na	NK S24-K4 RR	yes	na	yes	North East Research Farm in Floyd County	IA	2	2006	Ohnesorg2009-2-2006	author spreadsheet	no-till practices were used, soybean at 76-cm row spacing and 470,000 seeds per ha	150	na	no	yes	randomized block	2006-05-06	2006-06-26	2006-08-22	57	Sampling dates inferred from Fig. 3	yes	0.14	7	no insecticide	na
1036	16	Ohnesorg2009	Ohnesorg, W. J., K. D. Johnson, and M. E. O'Neal.	2009	Journal of Economic Entomology	102(5): 1816-1826	Impact of reduced-risk insecticides on soybean aphid and associated natural enemies	public	crop industry/seed-chemical industry	yes	USA	North America	field	author	no	author provided seasonal means	no	soybean	soybean	IMI	IMI	0.25	na	NK S24-K4 RR	yes	na	yes	North East Research Farm in Floyd County	IA	2	2006	Ohnesorg2009-2-2006	author spreadsheet	no-till practices were used, soybean at 76-cm row spacing and 470,000 seeds per ha	150	na	no	yes	randomized block	2006-05-06	2006-06-26	2006-08-22	57	Sampling dates inferred from Fig. 3	yes	0.14	7	no insecticide	na
1037	16	Ohnesorg2009	Ohnesorg, W. J., K. D. Johnson, and M. E. O'Neal.	2009	Journal of Economic Entomology	102(5): 1816-1826	Impact of reduced-risk insecticides on soybean aphid and associated natural enemies	public	crop industry/seed-chemical industry	yes	USA	North America	field	author	no	author provided seasonal means	no	soybean	soybean	THX	THX/CLO	na	na	NK S24-K4 RR	yes	na	yes	North East Research Farm in Floyd County	IA	2	2006	Ohnesorg2009-2-2006	author spreadsheet	no-till practices were used, soybean at 76-cm row spacing and 470,000 seeds per ha	150	na	no	yes	randomized block	2006-05-06	2006-06-26	2006-08-22	57	Sampling dates inferred from Fig. 3	yes	0.14	7	no insecticide	na
1038	16	Ohnesorg2009	Ohnesorg, W. J., K. D. Johnson, and M. E. O'Neal.	2009	Journal of Economic Entomology	102(5): 1816-1826	Impact of reduced-risk insecticides on soybean aphid and associated natural enemies	public	crop industry/seed-chemical industry	yes	USA	North America	field	author	no	author provided seasonal means	no	soybean	soybean	IMI	IMI	0.25	na	NK S24-K4 RR	yes	na	yes	North East Research Farm in Floyd County	IA	2	2006	Ohnesorg2009-2-2006	author spreadsheet	no-till practices were used, soybean at 76-cm row spacing and 470,000 seeds per ha	150	na	no	yes	randomized block	2006-05-06	2006-06-26	2006-08-22	57	Sampling dates inferred from Fig. 3	yes	0.14	7	no insecticide	na
1039	16	Ohnesorg2009	Ohnesorg, W. J., K. D. Johnson, and M. E. O'Neal.	2009	Journal of Economic Entomology	102(5): 1816-1826	Impact of reduced-risk insecticides on soybean aphid and associated natural enemies	public	crop industry/seed-chemical industry	yes	USA	North America	field	author	no	author provided seasonal means	no	soybean	soybean	THX	THX/CLO	na	na	NK S24-K4 RR	yes	na	yes	North East Research Farm in Floyd County	IA	2	2006	Ohnesorg2009-2-2006	author spreadsheet	no-till practices were used, soybean at 76-cm row spacing and 470,000 seeds per ha	150	na	no	yes	randomized block	2006-05-06	2006-06-26	2006-08-22	57	Sampling dates inferred from Fig. 3	yes	0.14	7	no insecticide	na
1040	16	Ohnesorg2009	Ohnesorg, W. J., K. D. Johnson, and M. E. O'Neal.	2009	Journal of Economic Entomology	102(5): 1816-1826	Impact of reduced-risk insecticides on soybean aphid and associated natural enemies	public	crop industry/seed-chemical industry	yes	USA	North America	field	author	no	author provided seasonal means	no	soybean	soybean	IMI	IMI	0.25	na	NK S24-K4 RR	yes	na	yes	North East Research Farm in Floyd County	IA	2	2006	Ohnesorg2009-2-2006	author spreadsheet	no-till practices were used, soybean at 76-cm row spacing and 470,000 seeds per ha	150	na	no	yes	randomized block	2006-05-06	2006-06-26	2006-08-22	57	Sampling dates inferred from Fig. 3	yes	0.14	7	no insecticide	na
1041	16	Ohnesorg2009	Ohnesorg, W. J., K. D. Johnson, and M. E. O'Neal.	2009	Journal of Economic Entomology	102(5): 1816-1826	Impact of reduced-risk insecticides on soybean aphid and associated natural enemies	public	crop industry/seed-chemical industry	yes	USA	North America	field	author	no	author provided seasonal means	no	soybean	soybean	THX	THX/CLO	na	na	NK S24-K4 RR	yes	na	yes	North East Research Farm in Floyd County	IA	2	2006	Ohnesorg2009-2-2006	author spreadsheet	no-till practices were used, soybean at 76-cm row spacing and 470,000 seeds per ha	150	na	no	yes	randomized block	2006-05-06	2006-06-26	2006-08-22	57	Sampling dates inferred from Fig. 3	yes	0.14	7	no insecticide	na
1042	16	Ohnesorg2009	Ohnesorg, W. J., K. D. Johnson, and M. E. O'Neal.	2009	Journal of Economic Entomology	102(5): 1816-1826	Impact of reduced-risk insecticides on soybean aphid and associated natural enemies	public	crop industry/seed-chemical industry	yes	USA	North America	field	author	no	author provided seasonal means	no	soybean	soybean	IMI	IMI	0.25	na	NK S24-K4 RR	yes	na	yes	North East Research Farm in Floyd County	IA	2	2006	Ohnesorg2009-2-2006	author spreadsheet	no-till practices were used, soybean at 76-cm row spacing and 470,000 seeds per ha	150	na	no	yes	randomized block	2006-05-06	2006-06-26	2006-08-22	57	Sampling dates inferred from Fig. 3	yes	0.14	7	no insecticide	na
1043	16	Ohnesorg2009	Ohnesorg, W. J., K. D. Johnson, and M. E. O'Neal.	2009	Journal of Economic Entomology	102(5): 1816-1826	Impact of reduced-risk insecticides on soybean aphid and associated natural enemies	public	crop industry/seed-chemical industry	yes	USA	North America	field	author	no	author provided seasonal means	no	soybean	soybean	THX	THX/CLO	na	na	NK S24-K4 RR	yes	na	yes	North East Research Farm in Floyd County	IA	2	2006	Ohnesorg2009-2-2006	author spreadsheet	no-till practices were used, soybean at 76-cm row spacing and 470,000 seeds per ha	150	na	no	yes	randomized block	2006-05-06	2006-06-26	2006-08-22	57	Sampling dates inferred from Fig. 3	yes	0.14	7	no insecticide	na
1044	16	Ohnesorg2009	Ohnesorg, W. J., K. D. Johnson, and M. E. O'Neal.	2009	Journal of Economic Entomology	102(5): 1816-1826	Impact of reduced-risk insecticides on soybean aphid and associated natural enemies	public	crop industry/seed-chemical industry	yes	USA	North America	field	author	no	author provided seasonal means	no	soybean	soybean	IMI	IMI	0.25	na	NK S23-Z3 RR	yes	na	yes	North East Research Farm in Floyd County	IA	1	2005	Ohnesorg2009-1-2005	author spreadsheet	no-till practices were used, soybean at 76-cm row spacing and 470,000 seeds per ha	150	na	no	yes	randomized block	2005-05-22				Sampling dates are unclear from methods and results	yes	0.14	na	no insecticide	na
1045	16	Ohnesorg2009	Ohnesorg, W. J., K. D. Johnson, and M. E. O'Neal.	2009	Journal of Economic Entomology	102(5): 1816-1826	Impact of reduced-risk insecticides on soybean aphid and associated natural enemies	public	crop industry/seed-chemical industry	yes	USA	North America	field	author	no	author provided seasonal means	no	soybean	soybean	THX	THX/CLO	na	na	NK S23-Z3 RR	yes	na	yes	North East Research Farm in Floyd County	IA	1	2005	Ohnesorg2009-1-2005	author spreadsheet	no-till practices were used, soybean at 76-cm row spacing and 470,000 seeds per ha	150	na	no	yes	randomized block	2005-05-22				Sampling dates are unclear from methods and results	yes	0.14	na	no insecticide	na
1046	16	Ohnesorg2009	Ohnesorg, W. J., K. D. Johnson, and M. E. O'Neal.	2009	Journal of Economic Entomology	102(5): 1816-1826	Impact of reduced-risk insecticides on soybean aphid and associated natural enemies	public	crop industry/seed-chemical industry	yes	USA	North America	field	author	no	author provided seasonal means	no	soybean	soybean	IMI	IMI	0.25	na	NK S23-Z3 RR	yes	na	yes	North East Research Farm in Floyd County	IA	1	2005	Ohnesorg2009-1-2005	author spreadsheet	no-till practices were used, soybean at 76-cm row spacing and 470,000 seeds per ha	150	na	no	yes	randomized block	2005-05-22				Sampling dates are unclear from methods and results	yes	0.14	na	no insecticide	na
1047	16	Ohnesorg2009	Ohnesorg, W. J., K. D. Johnson, and M. E. O'Neal.	2009	Journal of Economic Entomology	102(5): 1816-1826	Impact of reduced-risk insecticides on soybean aphid and associated natural enemies	public	crop industry/seed-chemical industry	yes	USA	North America	field	author	no	author provided seasonal means	no	soybean	soybean	THX	THX/CLO	na	na	NK S23-Z3 RR	yes	na	yes	North East Research Farm in Floyd County	IA	1	2005	Ohnesorg2009-1-2005	author spreadsheet	no-till practices were used, soybean at 76-cm row spacing and 470,000 seeds per ha	150	na	no	yes	randomized block	2005-05-22				Sampling dates are unclear from methods and results	yes	0.14	na	no insecticide	na
1048	16	Ohnesorg2009	Ohnesorg, W. J., K. D. Johnson, and M. E. O'Neal.	2009	Journal of Economic Entomology	102(5): 1816-1826	Impact of reduced-risk insecticides on soybean aphid and associated natural enemies	public	crop industry/seed-chemical industry	yes	USA	North America	field	author	no	author provided seasonal means	no	soybean	soybean	IMI	IMI	0.25	na	NK S23-Z3 RR	yes	na	yes	North East Research Farm in Floyd County	IA	1	2005	Ohnesorg2009-1-2005	author spreadsheet	no-till practices were used, soybean at 76-cm row spacing and 470,000 seeds per ha	150	na	no	yes	randomized block	2005-05-22				Sampling dates are unclear from methods and results	yes	0.14	na	no insecticide	na
1049	16	Ohnesorg2009	Ohnesorg, W. J., K. D. Johnson, and M. E. O'Neal.	2009	Journal of Economic Entomology	102(5): 1816-1826	Impact of reduced-risk insecticides on soybean aphid and associated natural enemies	public	crop industry/seed-chemical industry	yes	USA	North America	field	author	no	author provided seasonal means	no	soybean	soybean	THX	THX/CLO	na	na	NK S23-Z3 RR	yes	na	yes	North East Research Farm in Floyd County	IA	1	2005	Ohnesorg2009-1-2005	author spreadsheet	no-till practices were used, soybean at 76-cm row spacing and 470,000 seeds per ha	150	na	no	yes	randomized block	2005-05-22				Sampling dates are unclear from methods and results	yes	0.14	na	no insecticide	na
1050	16	Ohnesorg2009	Ohnesorg, W. J., K. D. Johnson, and M. E. O'Neal.	2009	Journal of Economic Entomology	102(5): 1816-1826	Impact of reduced-risk insecticides on soybean aphid and associated natural enemies	public	crop industry/seed-chemical industry	yes	USA	North America	field	author	no	author provided seasonal means	no	soybean	soybean	IMI	IMI	0.25	na	NK S23-Z3 RR	yes	na	yes	North East Research Farm in Floyd County	IA	1	2005	Ohnesorg2009-1-2005	author spreadsheet	no-till practices were used, soybean at 76-cm row spacing and 470,000 seeds per ha	150	na	no	yes	randomized block	2005-05-22				Sampling dates are unclear from methods and results	yes	0.14	na	no insecticide	na
1051	16	Ohnesorg2009	Ohnesorg, W. J., K. D. Johnson, and M. E. O'Neal.	2009	Journal of Economic Entomology	102(5): 1816-1826	Impact of reduced-risk insecticides on soybean aphid and associated natural enemies	public	crop industry/seed-chemical industry	yes	USA	North America	field	author	no	author provided seasonal means	no	soybean	soybean	THX	THX/CLO	na	na	NK S23-Z3 RR	yes	na	yes	North East Research Farm in Floyd County	IA	1	2005	Ohnesorg2009-1-2005	author spreadsheet	no-till practices were used, soybean at 76-cm row spacing and 470,000 seeds per ha	150	na	no	yes	randomized block	2005-05-22				Sampling dates are unclear from methods and results	yes	0.14	na	no insecticide	na
1052	16	Ohnesorg2009	Ohnesorg, W. J., K. D. Johnson, and M. E. O'Neal.	2009	Journal of Economic Entomology	102(5): 1816-1826	Impact of reduced-risk insecticides on soybean aphid and associated natural enemies	public	crop industry/seed-chemical industry	yes	USA	North America	field	author	no	author provided seasonal means	no	soybean	soybean	IMI	IMI	0.25	na	NK S23-Z3 RR	yes	na	yes	North East Research Farm in Floyd County	IA	1	2005	Ohnesorg2009-1-2005	author spreadsheet	no-till practices were used, soybean at 76-cm row spacing and 470,000 seeds per ha	150	na	no	yes	randomized block	2005-05-22				Sampling dates are unclear from methods and results	yes	0.14	na	no insecticide	na
1053	16	Ohnesorg2009	Ohnesorg, W. J., K. D. Johnson, and M. E. O'Neal.	2009	Journal of Economic Entomology	102(5): 1816-1826	Impact of reduced-risk insecticides on soybean aphid and associated natural enemies	public	crop industry/seed-chemical industry	yes	USA	North America	field	author	no	author provided seasonal means	no	soybean	soybean	THX	THX/CLO	na	na	NK S23-Z3 RR	yes	na	yes	North East Research Farm in Floyd County	IA	1	2005	Ohnesorg2009-1-2005	author spreadsheet	no-till practices were used, soybean at 76-cm row spacing and 470,000 seeds per ha	150	na	no	yes	randomized block	2005-05-22				Sampling dates are unclear from methods and results	yes	0.14	na	no insecticide	na
1054	16	Ohnesorg2009	Ohnesorg, W. J., K. D. Johnson, and M. E. O'Neal.	2009	Journal of Economic Entomology	102(5): 1816-1826	Impact of reduced-risk insecticides on soybean aphid and associated natural enemies	public	crop industry/seed-chemical industry	yes	USA	North America	field	author	no	author provided seasonal means	no	soybean	soybean	IMI	IMI	0.25	na	NK S23-Z3 RR	yes	na	yes	North East Research Farm in Floyd County	IA	1	2005	Ohnesorg2009-1-2005	author spreadsheet	no-till practices were used, soybean at 76-cm row spacing and 470,000 seeds per ha	150	na	no	yes	randomized block	2005-05-22				Sampling dates are unclear from methods and results	yes	0.14	na	no insecticide	na
1055	16	Ohnesorg2009	Ohnesorg, W. J., K. D. Johnson, and M. E. O'Neal.	2009	Journal of Economic Entomology	102(5): 1816-1826	Impact of reduced-risk insecticides on soybean aphid and associated natural enemies	public	crop industry/seed-chemical industry	yes	USA	North America	field	author	no	author provided seasonal means	no	soybean	soybean	THX	THX/CLO	na	na	NK S23-Z3 RR	yes	na	yes	North East Research Farm in Floyd County	IA	1	2005	Ohnesorg2009-1-2005	author spreadsheet	no-till practices were used, soybean at 76-cm row spacing and 470,000 seeds per ha	150	na	no	yes	randomized block	2005-05-22				Sampling dates are unclear from methods and results	yes	0.14	na	no insecticide	na
1056	16	Ohnesorg2009	Ohnesorg, W. J., K. D. Johnson, and M. E. O'Neal.	2009	Journal of Economic Entomology	102(5): 1816-1826	Impact of reduced-risk insecticides on soybean aphid and associated natural enemies	public	crop industry/seed-chemical industry	yes	USA	North America	field	author	no	author provided seasonal means	no	soybean	soybean	IMI	IMI	0.25	na	NK S23-Z3 RR	yes	na	yes	North East Research Farm in Floyd County	IA	1	2005	Ohnesorg2009-1-2005	author spreadsheet	no-till practices were used, soybean at 76-cm row spacing and 470,000 seeds per ha	150	na	no	yes	randomized block	2005-05-22				Sampling dates are unclear from methods and results	yes	0.14	na	no insecticide	na
1057	16	Ohnesorg2009	Ohnesorg, W. J., K. D. Johnson, and M. E. O'Neal.	2009	Journal of Economic Entomology	102(5): 1816-1826	Impact of reduced-risk insecticides on soybean aphid and associated natural enemies	public	crop industry/seed-chemical industry	yes	USA	North America	field	author	no	author provided seasonal means	no	soybean	soybean	THX	THX/CLO	na	na	NK S23-Z3 RR	yes	na	yes	North East Research Farm in Floyd County	IA	1	2005	Ohnesorg2009-1-2005	author spreadsheet	no-till practices were used, soybean at 76-cm row spacing and 470,000 seeds per ha	150	na	no	yes	randomized block	2005-05-22				Sampling dates are unclear from methods and results	yes	0.14	na	no insecticide	na
1058	16	Ohnesorg2009	Ohnesorg, W. J., K. D. Johnson, and M. E. O'Neal.	2009	Journal of Economic Entomology	102(5): 1816-1826	Impact of reduced-risk insecticides on soybean aphid and associated natural enemies	public	crop industry/seed-chemical industry	yes	USA	North America	field	author	no	author provided seasonal means	no	soybean	soybean	IMI	IMI	0.25	na	NK S23-Z3 RR	yes	na	yes	North East Research Farm in Floyd County	IA	1	2005	Ohnesorg2009-1-2005	author spreadsheet	no-till practices were used, soybean at 76-cm row spacing and 470,000 seeds per ha	150	na	no	yes	randomized block	2005-05-22				Sampling dates are unclear from methods and results	yes	0.14	na	no insecticide	na
1059	16	Ohnesorg2009	Ohnesorg, W. J., K. D. Johnson, and M. E. O'Neal.	2009	Journal of Economic Entomology	102(5): 1816-1826	Impact of reduced-risk insecticides on soybean aphid and associated natural enemies	public	crop industry/seed-chemical industry	yes	USA	North America	field	author	no	author provided seasonal means	no	soybean	soybean	THX	THX/CLO	na	na	NK S23-Z3 RR	yes	na	yes	North East Research Farm in Floyd County	IA	1	2005	Ohnesorg2009-1-2005	author spreadsheet	no-till practices were used, soybean at 76-cm row spacing and 470,000 seeds per ha	150	na	no	yes	randomized block	2005-05-22				Sampling dates are unclear from methods and results	yes	0.14	na	no insecticide	na
1060	16	Ohnesorg2009	Ohnesorg, W. J., K. D. Johnson, and M. E. O'Neal.	2009	Journal of Economic Entomology	102(5): 1816-1826	Impact of reduced-risk insecticides on soybean aphid and associated natural enemies	public	crop industry/seed-chemical industry	yes	USA	North America	field	author	no	author provided seasonal means	no	soybean	soybean	IMI	IMI	0.25	na	NK S23-Z3 RR	yes	na	yes	North East Research Farm in Floyd County	IA	1	2005	Ohnesorg2009-1-2005	author spreadsheet	no-till practices were used, soybean at 76-cm row spacing and 470,000 seeds per ha	150	na	no	yes	randomized block	2005-05-22				Sampling dates are unclear from methods and results	yes	0.14	na	no insecticide	na
1061	16	Ohnesorg2009	Ohnesorg, W. J., K. D. Johnson, and M. E. O'Neal.	2009	Journal of Economic Entomology	102(5): 1816-1826	Impact of reduced-risk insecticides on soybean aphid and associated natural enemies	public	crop industry/seed-chemical industry	yes	USA	North America	field	author	no	author provided seasonal means	no	soybean	soybean	THX	THX/CLO	na	na	NK S23-Z3 RR	yes	na	yes	North East Research Farm in Floyd County	IA	1	2005	Ohnesorg2009-1-2005	author spreadsheet	no-till practices were used, soybean at 76-cm row spacing and 470,000 seeds per ha	150	na	no	yes	randomized block	2005-05-22				Sampling dates are unclear from methods and results	yes	0.14	na	no insecticide	na
1062	16	Ohnesorg2009	Ohnesorg, W. J., K. D. Johnson, and M. E. O'Neal.	2009	Journal of Economic Entomology	102(5): 1816-1826	Impact of reduced-risk insecticides on soybean aphid and associated natural enemies	public	crop industry/seed-chemical industry	yes	USA	North America	field	author	no	author provided seasonal means	no	soybean	soybean	IMI	IMI	0.25	na	NK S23-Z3 RR	yes	na	yes	North East Research Farm in Floyd County	IA	1	2005	Ohnesorg2009-1-2005	author spreadsheet	no-till practices were used, soybean at 76-cm row spacing and 470,000 seeds per ha	150	na	no	yes	randomized block	2005-05-22				Sampling dates are unclear from methods and results	yes	0.14	na	no insecticide	na
1063	16	Ohnesorg2009	Ohnesorg, W. J., K. D. Johnson, and M. E. O'Neal.	2009	Journal of Economic Entomology	102(5): 1816-1826	Impact of reduced-risk insecticides on soybean aphid and associated natural enemies	public	crop industry/seed-chemical industry	yes	USA	North America	field	author	no	author provided seasonal means	no	soybean	soybean	THX	THX/CLO	na	na	NK S23-Z3 RR	yes	na	yes	North East Research Farm in Floyd County	IA	1	2005	Ohnesorg2009-1-2005	author spreadsheet	no-till practices were used, soybean at 76-cm row spacing and 470,000 seeds per ha	150	na	no	yes	randomized block	2005-05-22				Sampling dates are unclear from methods and results	yes	0.14	na	no insecticide	na
1064	16	Ohnesorg2009	Ohnesorg, W. J., K. D. Johnson, and M. E. O'Neal.	2009	Journal of Economic Entomology	102(5): 1816-1826	Impact of reduced-risk insecticides on soybean aphid and associated natural enemies	public	crop industry/seed-chemical industry	yes	USA	North America	field	author	no	author provided seasonal means	no	soybean	soybean	IMI	IMI	0.25	na	NK S23-Z3 RR	yes	na	yes	North East Research Farm in Floyd County	IA	1	2005	Ohnesorg2009-1-2005	author spreadsheet	no-till practices were used, soybean at 76-cm row spacing and 470,000 seeds per ha	150	na	no	yes	randomized block	2005-05-22				Sampling dates are unclear from methods and results	yes	0.14	na	no insecticide	na
1065	16	Ohnesorg2009	Ohnesorg, W. J., K. D. Johnson, and M. E. O'Neal.	2009	Journal of Economic Entomology	102(5): 1816-1826	Impact of reduced-risk insecticides on soybean aphid and associated natural enemies	public	crop industry/seed-chemical industry	yes	USA	North America	field	author	no	author provided seasonal means	no	soybean	soybean	THX	THX/CLO	na	na	NK S23-Z3 RR	yes	na	yes	North East Research Farm in Floyd County	IA	1	2005	Ohnesorg2009-1-2005	author spreadsheet	no-till practices were used, soybean at 76-cm row spacing and 470,000 seeds per ha	150	na	no	yes	randomized block	2005-05-22				Sampling dates are unclear from methods and results	yes	0.14	na	no insecticide	na
1066	16	Ohnesorg2009	Ohnesorg, W. J., K. D. Johnson, and M. E. O'Neal.	2009	Journal of Economic Entomology	102(5): 1816-1826	Impact of reduced-risk insecticides on soybean aphid and associated natural enemies	public	crop industry/seed-chemical industry	yes	USA	North America	field	author	no	author provided seasonal means	no	soybean	soybean	IMI	IMI	0.25	na	NK S23-Z3 RR	yes	na	yes	North East Research Farm in Floyd County	IA	1	2005	Ohnesorg2009-1-2005	author spreadsheet	no-till practices were used, soybean at 76-cm row spacing and 470,000 seeds per ha	150	na	no	yes	randomized block	2005-05-22				Sampling dates are unclear from methods and results	yes	0.14	na	no insecticide	na
1067	16	Ohnesorg2009	Ohnesorg, W. J., K. D. Johnson, and M. E. O'Neal.	2009	Journal of Economic Entomology	102(5): 1816-1826	Impact of reduced-risk insecticides on soybean aphid and associated natural enemies	public	crop industry/seed-chemical industry	yes	USA	North America	field	author	no	author provided seasonal means	no	soybean	soybean	THX	THX/CLO	na	na	NK S23-Z3 RR	yes	na	yes	North East Research Farm in Floyd County	IA	1	2005	Ohnesorg2009-1-2005	author spreadsheet	no-till practices were used, soybean at 76-cm row spacing and 470,000 seeds per ha	150	na	no	yes	randomized block	2005-05-22				Sampling dates are unclear from methods and results	yes	0.14	na	no insecticide	na
1068	16	Ohnesorg2009	Ohnesorg, W. J., K. D. Johnson, and M. E. O'Neal.	2009	Journal of Economic Entomology	102(5): 1816-1826	Impact of reduced-risk insecticides on soybean aphid and associated natural enemies	public	crop industry/seed-chemical industry	yes	USA	North America	field	author	no	author provided seasonal means	no	soybean	soybean	IMI	IMI	0.25	na	NK S23-Z3 RR	yes	na	yes	North East Research Farm in Floyd County	IA	1	2005	Ohnesorg2009-1-2005	author spreadsheet	no-till practices were used, soybean at 76-cm row spacing and 470,000 seeds per ha	150	na	no	yes	randomized block	2005-05-22				Sampling dates are unclear from methods and results	yes	0.14	na	no insecticide	na
1069	16	Ohnesorg2009	Ohnesorg, W. J., K. D. Johnson, and M. E. O'Neal.	2009	Journal of Economic Entomology	102(5): 1816-1826	Impact of reduced-risk insecticides on soybean aphid and associated natural enemies	public	crop industry/seed-chemical industry	yes	USA	North America	field	author	no	author provided seasonal means	no	soybean	soybean	THX	THX/CLO	na	na	NK S23-Z3 RR	yes	na	yes	North East Research Farm in Floyd County	IA	1	2005	Ohnesorg2009-1-2005	author spreadsheet	no-till practices were used, soybean at 76-cm row spacing and 470,000 seeds per ha	150	na	no	yes	randomized block	2005-05-22				Sampling dates are unclear from methods and results	yes	0.14	na	no insecticide	na
1070	16	Ohnesorg2009	Ohnesorg, W. J., K. D. Johnson, and M. E. O'Neal.	2009	Journal of Economic Entomology	102(5): 1816-1826	Impact of reduced-risk insecticides on soybean aphid and associated natural enemies	public	crop industry/seed-chemical industry	yes	USA	North America	field	author	no	author provided seasonal means	no	soybean	soybean	IMI	IMI	0.25	na	NK S23-Z3 RR	yes	na	yes	North East Research Farm in Floyd County	IA	1	2005	Ohnesorg2009-1-2005	author spreadsheet	no-till practices were used, soybean at 76-cm row spacing and 470,000 seeds per ha	150	na	no	yes	randomized block	2005-05-22				Sampling dates are unclear from methods and results	yes	0.14	na	no insecticide	na
1071	16	Ohnesorg2009	Ohnesorg, W. J., K. D. Johnson, and M. E. O'Neal.	2009	Journal of Economic Entomology	102(5): 1816-1826	Impact of reduced-risk insecticides on soybean aphid and associated natural enemies	public	crop industry/seed-chemical industry	yes	USA	North America	field	author	no	author provided seasonal means	no	soybean	soybean	THX	THX/CLO	na	na	NK S23-Z3 RR	yes	na	yes	North East Research Farm in Floyd County	IA	1	2005	Ohnesorg2009-1-2005	author spreadsheet	no-till practices were used, soybean at 76-cm row spacing and 470,000 seeds per ha	150	na	no	yes	randomized block	2005-05-22				Sampling dates are unclear from methods and results	yes	0.14	na	no insecticide	na
1072	16	Ohnesorg2009	Ohnesorg, W. J., K. D. Johnson, and M. E. O'Neal.	2009	Journal of Economic Entomology	102(5): 1816-1826	Impact of reduced-risk insecticides on soybean aphid and associated natural enemies	public	crop industry/seed-chemical industry	yes	USA	North America	field	author	no	author provided seasonal means	no	soybean	soybean	IMI	IMI	0.25	na	NK S23-Z3 RR	yes	na	yes	North East Research Farm in Floyd County	IA	1	2005	Ohnesorg2009-1-2005	author spreadsheet	no-till practices were used, soybean at 76-cm row spacing and 470,000 seeds per ha	150	na	no	yes	randomized block	2005-05-22				Sampling dates are unclear from methods and results	yes	0.14	na	no insecticide	na
1073	16	Ohnesorg2009	Ohnesorg, W. J., K. D. Johnson, and M. E. O'Neal.	2009	Journal of Economic Entomology	102(5): 1816-1826	Impact of reduced-risk insecticides on soybean aphid and associated natural enemies	public	crop industry/seed-chemical industry	yes	USA	North America	field	author	no	author provided seasonal means	no	soybean	soybean	THX	THX/CLO	na	na	NK S23-Z3 RR	yes	na	yes	North East Research Farm in Floyd County	IA	1	2005	Ohnesorg2009-1-2005	author spreadsheet	no-till practices were used, soybean at 76-cm row spacing and 470,000 seeds per ha	150	na	no	yes	randomized block	2005-05-22				Sampling dates are unclear from methods and results	yes	0.14	na	no insecticide	na
1074	16	Ohnesorg2009	Ohnesorg, W. J., K. D. Johnson, and M. E. O'Neal.	2009	Journal of Economic Entomology	102(5): 1816-1826	Impact of reduced-risk insecticides on soybean aphid and associated natural enemies	public	crop industry/seed-chemical industry	yes	USA	North America	field	author	no	author provided seasonal means	no	soybean	soybean	IMI	IMI	0.25	na	NK S23-Z3 RR	yes	na	yes	North East Research Farm in Floyd County	IA	1	2005	Ohnesorg2009-1-2005	author spreadsheet	no-till practices were used, soybean at 76-cm row spacing and 470,000 seeds per ha	150	na	no	yes	randomized block	2005-05-22				Sampling dates are unclear from methods and results	yes	0.14	na	no insecticide	na
1075	16	Ohnesorg2009	Ohnesorg, W. J., K. D. Johnson, and M. E. O'Neal.	2009	Journal of Economic Entomology	102(5): 1816-1826	Impact of reduced-risk insecticides on soybean aphid and associated natural enemies	public	crop industry/seed-chemical industry	yes	USA	North America	field	author	no	author provided seasonal means	no	soybean	soybean	THX	THX/CLO	na	na	NK S23-Z3 RR	yes	na	yes	North East Research Farm in Floyd County	IA	1	2005	Ohnesorg2009-1-2005	author spreadsheet	no-till practices were used, soybean at 76-cm row spacing and 470,000 seeds per ha	150	na	no	yes	randomized block	2005-05-22				Sampling dates are unclear from methods and results	yes	0.14	na	no insecticide	na
1076	16	Ohnesorg2009	Ohnesorg, W. J., K. D. Johnson, and M. E. O'Neal.	2009	Journal of Economic Entomology	102(5): 1816-1826	Impact of reduced-risk insecticides on soybean aphid and associated natural enemies	public	crop industry/seed-chemical industry	yes	USA	North America	field	author	no	author provided seasonal means	no	soybean	soybean	IMI	IMI	0.25	na	NK S23-Z3 RR	yes	na	yes	North East Research Farm in Floyd County	IA	1	2005	Ohnesorg2009-1-2005	author spreadsheet	no-till practices were used, soybean at 76-cm row spacing and 470,000 seeds per ha	150	na	no	yes	randomized block	2005-05-22				Sampling dates are unclear from methods and results	yes	0.14	na	no insecticide	na
1077	16	Ohnesorg2009	Ohnesorg, W. J., K. D. Johnson, and M. E. O'Neal.	2009	Journal of Economic Entomology	102(5): 1816-1826	Impact of reduced-risk insecticides on soybean aphid and associated natural enemies	public	crop industry/seed-chemical industry	yes	USA	North America	field	author	no	author provided seasonal means	no	soybean	soybean	THX	THX/CLO	na	na	NK S23-Z3 RR	yes	na	yes	North East Research Farm in Floyd County	IA	1	2005	Ohnesorg2009-1-2005	author spreadsheet	no-till practices were used, soybean at 76-cm row spacing and 470,000 seeds per ha	150	na	no	yes	randomized block	2005-05-22				Sampling dates are unclear from methods and results	yes	0.14	na	no insecticide	na
1078	16	Ohnesorg2009	Ohnesorg, W. J., K. D. Johnson, and M. E. O'Neal.	2009	Journal of Economic Entomology	102(5): 1816-1826	Impact of reduced-risk insecticides on soybean aphid and associated natural enemies	public	crop industry/seed-chemical industry	yes	USA	North America	field	author	no	author provided seasonal means	no	soybean	soybean	IMI	IMI	0.25	na	NK S23-Z3 RR	yes	na	yes	North East Research Farm in Floyd County	IA	1	2005	Ohnesorg2009-1-2005	author spreadsheet	no-till practices were used, soybean at 76-cm row spacing and 470,000 seeds per ha	150	na	no	yes	randomized block	2005-05-22				Sampling dates are unclear from methods and results	yes	0.14	na	no insecticide	na
1079	16	Ohnesorg2009	Ohnesorg, W. J., K. D. Johnson, and M. E. O'Neal.	2009	Journal of Economic Entomology	102(5): 1816-1826	Impact of reduced-risk insecticides on soybean aphid and associated natural enemies	public	crop industry/seed-chemical industry	yes	USA	North America	field	author	no	author provided seasonal means	no	soybean	soybean	THX	THX/CLO	na	na	NK S23-Z3 RR	yes	na	yes	North East Research Farm in Floyd County	IA	1	2005	Ohnesorg2009-1-2005	author spreadsheet	no-till practices were used, soybean at 76-cm row spacing and 470,000 seeds per ha	150	na	no	yes	randomized block	2005-05-22				Sampling dates are unclear from methods and results	yes	0.14	na	no insecticide	na
1080	16	Ohnesorg2009	Ohnesorg, W. J., K. D. Johnson, and M. E. O'Neal.	2009	Journal of Economic Entomology	102(5): 1816-1826	Impact of reduced-risk insecticides on soybean aphid and associated natural enemies	public	crop industry/seed-chemical industry	yes	USA	North America	field	author	no	author provided seasonal means	no	soybean	soybean	IMI	IMI	0.25	na	NK S23-Z3 RR	yes	na	yes	North East Research Farm in Floyd County	IA	2	2006	Ohnesorg2009-2-2006	author spreadsheet	no-till practices were used, soybean at 76-cm row spacing and 470,000 seeds per ha	150	na	no	yes	randomized block	2006-05-06				Sampling dates are unclear from methods and results	yes	0.14	na	no insecticide	na
1081	16	Ohnesorg2009	Ohnesorg, W. J., K. D. Johnson, and M. E. O'Neal.	2009	Journal of Economic Entomology	102(5): 1816-1826	Impact of reduced-risk insecticides on soybean aphid and associated natural enemies	public	crop industry/seed-chemical industry	yes	USA	North America	field	author	no	author provided seasonal means	no	soybean	soybean	THX	THX/CLO	na	na	NK S23-Z3 RR	yes	na	yes	North East Research Farm in Floyd County	IA	2	2006	Ohnesorg2009-2-2006	author spreadsheet	no-till practices were used, soybean at 76-cm row spacing and 470,000 seeds per ha	150	na	no	yes	randomized block	2006-05-06				Sampling dates are unclear from methods and results	yes	0.14	na	no insecticide	na
1082	16	Ohnesorg2009	Ohnesorg, W. J., K. D. Johnson, and M. E. O'Neal.	2009	Journal of Economic Entomology	102(5): 1816-1826	Impact of reduced-risk insecticides on soybean aphid and associated natural enemies	public	crop industry/seed-chemical industry	yes	USA	North America	field	author	no	author provided seasonal means	no	soybean	soybean	IMI	IMI	0.25	na	NK S23-Z3 RR	yes	na	yes	North East Research Farm in Floyd County	IA	2	2006	Ohnesorg2009-2-2006	author spreadsheet	no-till practices were used, soybean at 76-cm row spacing and 470,000 seeds per ha	150	na	no	yes	randomized block	2006-05-06				Sampling dates are unclear from methods and results	yes	0.14	na	no insecticide	na
1083	16	Ohnesorg2009	Ohnesorg, W. J., K. D. Johnson, and M. E. O'Neal.	2009	Journal of Economic Entomology	102(5): 1816-1826	Impact of reduced-risk insecticides on soybean aphid and associated natural enemies	public	crop industry/seed-chemical industry	yes	USA	North America	field	author	no	author provided seasonal means	no	soybean	soybean	THX	THX/CLO	na	na	NK S23-Z3 RR	yes	na	yes	North East Research Farm in Floyd County	IA	2	2006	Ohnesorg2009-2-2006	author spreadsheet	no-till practices were used, soybean at 76-cm row spacing and 470,000 seeds per ha	150	na	no	yes	randomized block	2006-05-06				Sampling dates are unclear from methods and results	yes	0.14	na	no insecticide	na
1084	16	Ohnesorg2009	Ohnesorg, W. J., K. D. Johnson, and M. E. O'Neal.	2009	Journal of Economic Entomology	102(5): 1816-1826	Impact of reduced-risk insecticides on soybean aphid and associated natural enemies	public	crop industry/seed-chemical industry	yes	USA	North America	field	author	no	author provided seasonal means	no	soybean	soybean	IMI	IMI	0.25	na	NK S23-Z3 RR	yes	na	yes	North East Research Farm in Floyd County	IA	2	2006	Ohnesorg2009-2-2006	author spreadsheet	no-till practices were used, soybean at 76-cm row spacing and 470,000 seeds per ha	150	na	no	yes	randomized block	2006-05-06				Sampling dates are unclear from methods and results	yes	0.14	na	no insecticide	na
1085	16	Ohnesorg2009	Ohnesorg, W. J., K. D. Johnson, and M. E. O'Neal.	2009	Journal of Economic Entomology	102(5): 1816-1826	Impact of reduced-risk insecticides on soybean aphid and associated natural enemies	public	crop industry/seed-chemical industry	yes	USA	North America	field	author	no	author provided seasonal means	no	soybean	soybean	THX	THX/CLO	na	na	NK S23-Z3 RR	yes	na	yes	North East Research Farm in Floyd County	IA	2	2006	Ohnesorg2009-2-2006	author spreadsheet	no-till practices were used, soybean at 76-cm row spacing and 470,000 seeds per ha	150	na	no	yes	randomized block	2006-05-06				Sampling dates are unclear from methods and results	yes	0.14	na	no insecticide	na
1086	16	Ohnesorg2009	Ohnesorg, W. J., K. D. Johnson, and M. E. O'Neal.	2009	Journal of Economic Entomology	102(5): 1816-1826	Impact of reduced-risk insecticides on soybean aphid and associated natural enemies	public	crop industry/seed-chemical industry	yes	USA	North America	field	author	no	author provided seasonal means	no	soybean	soybean	IMI	IMI	0.25	na	NK S23-Z3 RR	yes	na	yes	North East Research Farm in Floyd County	IA	2	2006	Ohnesorg2009-2-2006	author spreadsheet	no-till practices were used, soybean at 76-cm row spacing and 470,000 seeds per ha	150	na	no	yes	randomized block	2006-05-06				Sampling dates are unclear from methods and results	yes	0.14	na	no insecticide	na
1087	16	Ohnesorg2009	Ohnesorg, W. J., K. D. Johnson, and M. E. O'Neal.	2009	Journal of Economic Entomology	102(5): 1816-1826	Impact of reduced-risk insecticides on soybean aphid and associated natural enemies	public	crop industry/seed-chemical industry	yes	USA	North America	field	author	no	author provided seasonal means	no	soybean	soybean	THX	THX/CLO	na	na	NK S23-Z3 RR	yes	na	yes	North East Research Farm in Floyd County	IA	2	2006	Ohnesorg2009-2-2006	author spreadsheet	no-till practices were used, soybean at 76-cm row spacing and 470,000 seeds per ha	150	na	no	yes	randomized block	2006-05-06				Sampling dates are unclear from methods and results	yes	0.14	na	no insecticide	na
1088	16	Ohnesorg2009	Ohnesorg, W. J., K. D. Johnson, and M. E. O'Neal.	2009	Journal of Economic Entomology	102(5): 1816-1826	Impact of reduced-risk insecticides on soybean aphid and associated natural enemies	public	crop industry/seed-chemical industry	yes	USA	North America	field	author	no	author provided seasonal means	no	soybean	soybean	IMI	IMI	0.25	na	NK S23-Z3 RR	yes	na	yes	North East Research Farm in Floyd County	IA	2	2006	Ohnesorg2009-2-2006	author spreadsheet	no-till practices were used, soybean at 76-cm row spacing and 470,000 seeds per ha	150	na	no	yes	randomized block	2006-05-06				Sampling dates are unclear from methods and results	yes	0.14	na	no insecticide	na
1089	16	Ohnesorg2009	Ohnesorg, W. J., K. D. Johnson, and M. E. O'Neal.	2009	Journal of Economic Entomology	102(5): 1816-1826	Impact of reduced-risk insecticides on soybean aphid and associated natural enemies	public	crop industry/seed-chemical industry	yes	USA	North America	field	author	no	author provided seasonal means	no	soybean	soybean	THX	THX/CLO	na	na	NK S23-Z3 RR	yes	na	yes	North East Research Farm in Floyd County	IA	2	2006	Ohnesorg2009-2-2006	author spreadsheet	no-till practices were used, soybean at 76-cm row spacing and 470,000 seeds per ha	150	na	no	yes	randomized block	2006-05-06				Sampling dates are unclear from methods and results	yes	0.14	na	no insecticide	na
1090	16	Ohnesorg2009	Ohnesorg, W. J., K. D. Johnson, and M. E. O'Neal.	2009	Journal of Economic Entomology	102(5): 1816-1826	Impact of reduced-risk insecticides on soybean aphid and associated natural enemies	public	crop industry/seed-chemical industry	yes	USA	North America	field	author	no	author provided seasonal means	no	soybean	soybean	IMI	IMI	0.25	na	NK S23-Z3 RR	yes	na	yes	North East Research Farm in Floyd County	IA	2	2006	Ohnesorg2009-2-2006	author spreadsheet	no-till practices were used, soybean at 76-cm row spacing and 470,000 seeds per ha	150	na	no	yes	randomized block	2006-05-06				Sampling dates are unclear from methods and results	yes	0.14	na	no insecticide	na
1091	16	Ohnesorg2009	Ohnesorg, W. J., K. D. Johnson, and M. E. O'Neal.	2009	Journal of Economic Entomology	102(5): 1816-1826	Impact of reduced-risk insecticides on soybean aphid and associated natural enemies	public	crop industry/seed-chemical industry	yes	USA	North America	field	author	no	author provided seasonal means	no	soybean	soybean	THX	THX/CLO	na	na	NK S23-Z3 RR	yes	na	yes	North East Research Farm in Floyd County	IA	2	2006	Ohnesorg2009-2-2006	author spreadsheet	no-till practices were used, soybean at 76-cm row spacing and 470,000 seeds per ha	150	na	no	yes	randomized block	2006-05-06				Sampling dates are unclear from methods and results	yes	0.14	na	no insecticide	na
1092	16	Ohnesorg2009	Ohnesorg, W. J., K. D. Johnson, and M. E. O'Neal.	2009	Journal of Economic Entomology	102(5): 1816-1826	Impact of reduced-risk insecticides on soybean aphid and associated natural enemies	public	crop industry/seed-chemical industry	yes	USA	North America	field	author	no	author provided seasonal means	no	soybean	soybean	IMI	IMI	0.25	na	NK S23-Z3 RR	yes	na	yes	North East Research Farm in Floyd County	IA	2	2006	Ohnesorg2009-2-2006	author spreadsheet	no-till practices were used, soybean at 76-cm row spacing and 470,000 seeds per ha	150	na	no	yes	randomized block	2006-05-06				Sampling dates are unclear from methods and results	yes	0.14	na	no insecticide	na
1093	16	Ohnesorg2009	Ohnesorg, W. J., K. D. Johnson, and M. E. O'Neal.	2009	Journal of Economic Entomology	102(5): 1816-1826	Impact of reduced-risk insecticides on soybean aphid and associated natural enemies	public	crop industry/seed-chemical industry	yes	USA	North America	field	author	no	author provided seasonal means	no	soybean	soybean	THX	THX/CLO	na	na	NK S23-Z3 RR	yes	na	yes	North East Research Farm in Floyd County	IA	2	2006	Ohnesorg2009-2-2006	author spreadsheet	no-till practices were used, soybean at 76-cm row spacing and 470,000 seeds per ha	150	na	no	yes	randomized block	2006-05-06				Sampling dates are unclear from methods and results	yes	0.14	na	no insecticide	na
1094	16	Ohnesorg2009	Ohnesorg, W. J., K. D. Johnson, and M. E. O'Neal.	2009	Journal of Economic Entomology	102(5): 1816-1826	Impact of reduced-risk insecticides on soybean aphid and associated natural enemies	public	crop industry/seed-chemical industry	yes	USA	North America	field	author	no	author provided seasonal means	no	soybean	soybean	IMI	IMI	0.25	na	NK S23-Z3 RR	yes	na	yes	North East Research Farm in Floyd County	IA	2	2006	Ohnesorg2009-2-2006	author spreadsheet	no-till practices were used, soybean at 76-cm row spacing and 470,000 seeds per ha	150	na	no	yes	randomized block	2006-05-06				Sampling dates are unclear from methods and results	yes	0.14	na	no insecticide	na
1095	16	Ohnesorg2009	Ohnesorg, W. J., K. D. Johnson, and M. E. O'Neal.	2009	Journal of Economic Entomology	102(5): 1816-1826	Impact of reduced-risk insecticides on soybean aphid and associated natural enemies	public	crop industry/seed-chemical industry	yes	USA	North America	field	author	no	author provided seasonal means	no	soybean	soybean	THX	THX/CLO	na	na	NK S23-Z3 RR	yes	na	yes	North East Research Farm in Floyd County	IA	2	2006	Ohnesorg2009-2-2006	author spreadsheet	no-till practices were used, soybean at 76-cm row spacing and 470,000 seeds per ha	150	na	no	yes	randomized block	2006-05-06				Sampling dates are unclear from methods and results	yes	0.14	na	no insecticide	na
1096	16	Ohnesorg2009	Ohnesorg, W. J., K. D. Johnson, and M. E. O'Neal.	2009	Journal of Economic Entomology	102(5): 1816-1826	Impact of reduced-risk insecticides on soybean aphid and associated natural enemies	public	crop industry/seed-chemical industry	yes	USA	North America	field	author	no	author provided seasonal means	no	soybean	soybean	IMI	IMI	0.25	na	NK S23-Z3 RR	yes	na	yes	North East Research Farm in Floyd County	IA	2	2006	Ohnesorg2009-2-2006	author spreadsheet	no-till practices were used, soybean at 76-cm row spacing and 470,000 seeds per ha	150	na	no	yes	randomized block	2006-05-06				Sampling dates are unclear from methods and results	yes	0.14	na	no insecticide	na
1097	16	Ohnesorg2009	Ohnesorg, W. J., K. D. Johnson, and M. E. O'Neal.	2009	Journal of Economic Entomology	102(5): 1816-1826	Impact of reduced-risk insecticides on soybean aphid and associated natural enemies	public	crop industry/seed-chemical industry	yes	USA	North America	field	author	no	author provided seasonal means	no	soybean	soybean	THX	THX/CLO	na	na	NK S23-Z3 RR	yes	na	yes	North East Research Farm in Floyd County	IA	2	2006	Ohnesorg2009-2-2006	author spreadsheet	no-till practices were used, soybean at 76-cm row spacing and 470,000 seeds per ha	150	na	no	yes	randomized block	2006-05-06				Sampling dates are unclear from methods and results	yes	0.14	na	no insecticide	na
1098	16	Ohnesorg2009	Ohnesorg, W. J., K. D. Johnson, and M. E. O'Neal.	2009	Journal of Economic Entomology	102(5): 1816-1826	Impact of reduced-risk insecticides on soybean aphid and associated natural enemies	public	crop industry/seed-chemical industry	yes	USA	North America	field	author	no	author provided seasonal means	no	soybean	soybean	IMI	IMI	0.25	na	NK S23-Z3 RR	yes	na	yes	North East Research Farm in Floyd County	IA	2	2006	Ohnesorg2009-2-2006	author spreadsheet	no-till practices were used, soybean at 76-cm row spacing and 470,000 seeds per ha	150	na	no	yes	randomized block	2006-05-06				Sampling dates are unclear from methods and results	yes	0.14	na	no insecticide	na
1099	16	Ohnesorg2009	Ohnesorg, W. J., K. D. Johnson, and M. E. O'Neal.	2009	Journal of Economic Entomology	102(5): 1816-1826	Impact of reduced-risk insecticides on soybean aphid and associated natural enemies	public	crop industry/seed-chemical industry	yes	USA	North America	field	author	no	author provided seasonal means	no	soybean	soybean	THX	THX/CLO	na	na	NK S23-Z3 RR	yes	na	yes	North East Research Farm in Floyd County	IA	2	2006	Ohnesorg2009-2-2006	author spreadsheet	no-till practices were used, soybean at 76-cm row spacing and 470,000 seeds per ha	150	na	no	yes	randomized block	2006-05-06				Sampling dates are unclear from methods and results	yes	0.14	na	no insecticide	na
1100	16	Ohnesorg2009	Ohnesorg, W. J., K. D. Johnson, and M. E. O'Neal.	2009	Journal of Economic Entomology	102(5): 1816-1826	Impact of reduced-risk insecticides on soybean aphid and associated natural enemies	public	crop industry/seed-chemical industry	yes	USA	North America	field	author	no	author provided seasonal means	no	soybean	soybean	IMI	IMI	0.25	na	NK S23-Z3 RR	yes	na	yes	North East Research Farm in Floyd County	IA	2	2006	Ohnesorg2009-2-2006	author spreadsheet	no-till practices were used, soybean at 76-cm row spacing and 470,000 seeds per ha	150	na	no	yes	randomized block	2006-05-06				Sampling dates are unclear from methods and results	yes	0.14	na	no insecticide	na
1101	16	Ohnesorg2009	Ohnesorg, W. J., K. D. Johnson, and M. E. O'Neal.	2009	Journal of Economic Entomology	102(5): 1816-1826	Impact of reduced-risk insecticides on soybean aphid and associated natural enemies	public	crop industry/seed-chemical industry	yes	USA	North America	field	author	no	author provided seasonal means	no	soybean	soybean	THX	THX/CLO	na	na	NK S23-Z3 RR	yes	na	yes	North East Research Farm in Floyd County	IA	2	2006	Ohnesorg2009-2-2006	author spreadsheet	no-till practices were used, soybean at 76-cm row spacing and 470,000 seeds per ha	150	na	no	yes	randomized block	2006-05-06				Sampling dates are unclear from methods and results	yes	0.14	na	no insecticide	na
1102	16	Ohnesorg2009	Ohnesorg, W. J., K. D. Johnson, and M. E. O'Neal.	2009	Journal of Economic Entomology	102(5): 1816-1826	Impact of reduced-risk insecticides on soybean aphid and associated natural enemies	public	crop industry/seed-chemical industry	yes	USA	North America	field	author	no	author provided seasonal means	no	soybean	soybean	IMI	IMI	0.25	na	NK S23-Z3 RR	yes	na	yes	North East Research Farm in Floyd County	IA	2	2006	Ohnesorg2009-2-2006	author spreadsheet	no-till practices were used, soybean at 76-cm row spacing and 470,000 seeds per ha	150	na	no	yes	randomized block	2006-05-06				Sampling dates are unclear from methods and results	yes	0.14	na	no insecticide	na
1103	16	Ohnesorg2009	Ohnesorg, W. J., K. D. Johnson, and M. E. O'Neal.	2009	Journal of Economic Entomology	102(5): 1816-1826	Impact of reduced-risk insecticides on soybean aphid and associated natural enemies	public	crop industry/seed-chemical industry	yes	USA	North America	field	author	no	author provided seasonal means	no	soybean	soybean	THX	THX/CLO	na	na	NK S23-Z3 RR	yes	na	yes	North East Research Farm in Floyd County	IA	2	2006	Ohnesorg2009-2-2006	author spreadsheet	no-till practices were used, soybean at 76-cm row spacing and 470,000 seeds per ha	150	na	no	yes	randomized block	2006-05-06				Sampling dates are unclear from methods and results	yes	0.14	na	no insecticide	na
1104	16	Ohnesorg2009	Ohnesorg, W. J., K. D. Johnson, and M. E. O'Neal.	2009	Journal of Economic Entomology	102(5): 1816-1826	Impact of reduced-risk insecticides on soybean aphid and associated natural enemies	public	crop industry/seed-chemical industry	yes	USA	North America	field	author	no	author provided seasonal means	no	soybean	soybean	IMI	IMI	0.25	na	NK S23-Z3 RR	yes	na	yes	North East Research Farm in Floyd County	IA	2	2006	Ohnesorg2009-2-2006	author spreadsheet	no-till practices were used, soybean at 76-cm row spacing and 470,000 seeds per ha	150	na	no	yes	randomized block	2006-05-06				Sampling dates are unclear from methods and results	yes	0.14	na	no insecticide	na
1105	16	Ohnesorg2009	Ohnesorg, W. J., K. D. Johnson, and M. E. O'Neal.	2009	Journal of Economic Entomology	102(5): 1816-1826	Impact of reduced-risk insecticides on soybean aphid and associated natural enemies	public	crop industry/seed-chemical industry	yes	USA	North America	field	author	no	author provided seasonal means	no	soybean	soybean	THX	THX/CLO	na	na	NK S23-Z3 RR	yes	na	yes	North East Research Farm in Floyd County	IA	2	2006	Ohnesorg2009-2-2006	author spreadsheet	no-till practices were used, soybean at 76-cm row spacing and 470,000 seeds per ha	150	na	no	yes	randomized block	2006-05-06				Sampling dates are unclear from methods and results	yes	0.14	na	no insecticide	na
1106	16	Ohnesorg2009	Ohnesorg, W. J., K. D. Johnson, and M. E. O'Neal.	2009	Journal of Economic Entomology	102(5): 1816-1826	Impact of reduced-risk insecticides on soybean aphid and associated natural enemies	public	crop industry/seed-chemical industry	yes	USA	North America	field	author	no	author provided seasonal means	no	soybean	soybean	IMI	IMI	0.25	na	NK S23-Z3 RR	yes	na	yes	North East Research Farm in Floyd County	IA	2	2006	Ohnesorg2009-2-2006	author spreadsheet	no-till practices were used, soybean at 76-cm row spacing and 470,000 seeds per ha	150	na	no	yes	randomized block	2006-05-06				Sampling dates are unclear from methods and results	yes	0.14	na	no insecticide	na
1107	16	Ohnesorg2009	Ohnesorg, W. J., K. D. Johnson, and M. E. O'Neal.	2009	Journal of Economic Entomology	102(5): 1816-1826	Impact of reduced-risk insecticides on soybean aphid and associated natural enemies	public	crop industry/seed-chemical industry	yes	USA	North America	field	author	no	author provided seasonal means	no	soybean	soybean	THX	THX/CLO	na	na	NK S23-Z3 RR	yes	na	yes	North East Research Farm in Floyd County	IA	2	2006	Ohnesorg2009-2-2006	author spreadsheet	no-till practices were used, soybean at 76-cm row spacing and 470,000 seeds per ha	150	na	no	yes	randomized block	2006-05-06				Sampling dates are unclear from methods and results	yes	0.14	na	no insecticide	na
[truncated: 328 more rows]
[truncated: 42 more columns]

## Sheet: Pyrethroid Control
id	article_id	study	authors	publication_year	journal	citation	title	author_affiliation	funding_source	peer_reviewed	country	continent	study_type	data_source	data_did_we_calc	data_calc_explanation	data_graphs	crop_species	crop_group	neonic_active_ingr	neonic_group	rate_g_kg_seed	rate_mg_seed	variety	variety_transgenic	variety_transgenic_Bt	variety_transgenic_HT	field_location	state_or_region	site_number	year_of_data	site_yr_ID	data_location	cultivation	plot_size	plot_size_explanation	is_plot_size_avg	was_study_randomized	study_design	planting_date	first_sample	last_sample	sampling_duration_days	duration_notes	early_sampling	early_samp_prop	number_of_samples	control_type	insecticide_name
[truncated: 547 more rows]
[truncated: 42 more columns]

[truncated: 2 more sheets: Key, Functional Groups]
