# Supplementary material for: Meta-analysis reveals that seed-applied neonicotinoids and pyrethroids have similar negative effects on abundance of arthropod natural enemies
Source: PeerJ journal article supplement (doi:10.7717/peerj.2776), 2016-12-07
Supplement: Supplemental_Results.pdf [file Supplemental_Results.pdf]

Supplemental Results

**Table S1.** Studies included in our meta-analysis of neonicotinoid seed treatment effects on natural enemies (full references at end).

| Crop               | Study abbrev.                 | Peer review | A.I.(s)       | Alt. insect. | Functional group(s) | Habitat      | Arth. class | Early samp. (%) | N plots | Plot size (m <sup>2</sup> ) |
|--------------------|-------------------------------|-------------|---------------|--------------|---------------------|--------------|-------------|-----------------|---------|-----------------------------|
| Barley             | SoteloCardona2010             |             | THX           |              | M, Pr, Pa           | F            | A, I        | 25              | 16      | 112                         |
| Canola             | Echegaray2009                 |             | IMI           | OP, OC, PYR  | O, Pr               | S            | I           | 20              | 3 - 4   | 100 - 752                   |
| Cotton/<br>Sorghum | Krauter2001                   |             | IMI           |              | Pr                  | F            | A, I        | 0               | 3       | 110000                      |
| Maize              | Ahmad20052006                 | X           | CLO           | PYR          | M, O, Pr            | F, S         | A, I        | 0 - 33          | 4       | 232                         |
|                    | Albajes2003                   | X           | IMI           |              | M, Pr               | F, S         | A, I        | 20              | 4       | 7000                        |
|                    | AlDeeb2003                    | X           | IMI, CLO      | OP, PYR      | M, O, Pr            | F, S         | A, I        | 0 - 33          | 4       | 23 - 28                     |
|                    | Babendreier2015               | X           | CLO           | BIO, PYR     | M, Pr               | S            | A, I        | 0               | 7 - 61  | 1                           |
|                    | Bhatti2005                    | X           | IMI           | Bt, PYR      | M, O, Pr, Pa        | F, S         | A, Ch, I    | 20 - 33         | 4       | 335                         |
|                    | delaPoza2005<br>Farinos2008   | X           | IMI           | Bt           | M, Pr               | F, S         | A, Ch, I    | 0 - 20          | 3 - 4   | 1833 - 5500                 |
|                    | Harmon2006                    |             | CLO           |              | M, O, Pr, Pa        | F, S         | A, Ch, I    | 66 - 100        | 4       | 729 - 1080                  |
|                    | Soybean                       | Douglas2015 | X             | THX          |                     | M, O, Pr, Pa | S           | A, I            | 25      | 6                           |
|                    | Hallett2014                   | X           | IMI, THX      |              | Pr, Pa              | F            | A, I        | 20 - 25         | 3       | 111                         |
|                    | HeidelBaker2012<br>Carter2013 |             | THX           | PYR          | Pr, Pa              | F            | I           | 0 - 10          | 4       | 1003                        |
|                    | Ohnesorg2009                  | X           | IMI, THX      | PYR, TRI     | M, Pr, Pa           | F            | A, I        | 14              | 6       | 150                         |
|                    | Seagraves2012                 | X           | IMI, THX      |              |                     | F            | A, I        | 13              | 4       | 41                          |
|                    | Spigler2013                   |             | THX           |              | Pr                  | F            | I           | 65              | 4       | 409                         |
|                    | Tinsley2012                   | X           | THX           |              | Pr                  | F            | I           | 0               | 4       | 70                          |
| Sugar beet         | Baker2002                     |             | IMI, CLO, THX | PYR          | M                   | S            | A, I        | 33              | 4       | 108                         |
| Sunflower          | Charlet et al. 2007           | X           | THX           | CARB         | Pa                  | F            | I           | 0               | 4       | 24                          |
| Wheat              | Schmidt et al. 2002           |             | IMI           |              | M                   | S            | I           | 0               | 4       | 10000                       |

Key to abbreviations: A.I. = active ingredient, Alt. insect. = alternative insecticide compared to neonicotinoid seed treatment, Early samp. (%) = the percentage of samples taken during the first 40 days of crop growth, IMI = imidacloprid, CLO = clothianidin, THX = thiamethoxam, BIO = biopesticide, Bt = transgenic Bt crop, CARB = carbamate, OC = organochlorines, OP = organophosphate, PYR = pyrethroid, M = mixed, O = omnivore, Pr = predator, Pa = parasitoid, F = foliar/aboveground, S = soil/belowground, I = insect, A = arachnid, Ch = chilopod

Supplemental Results

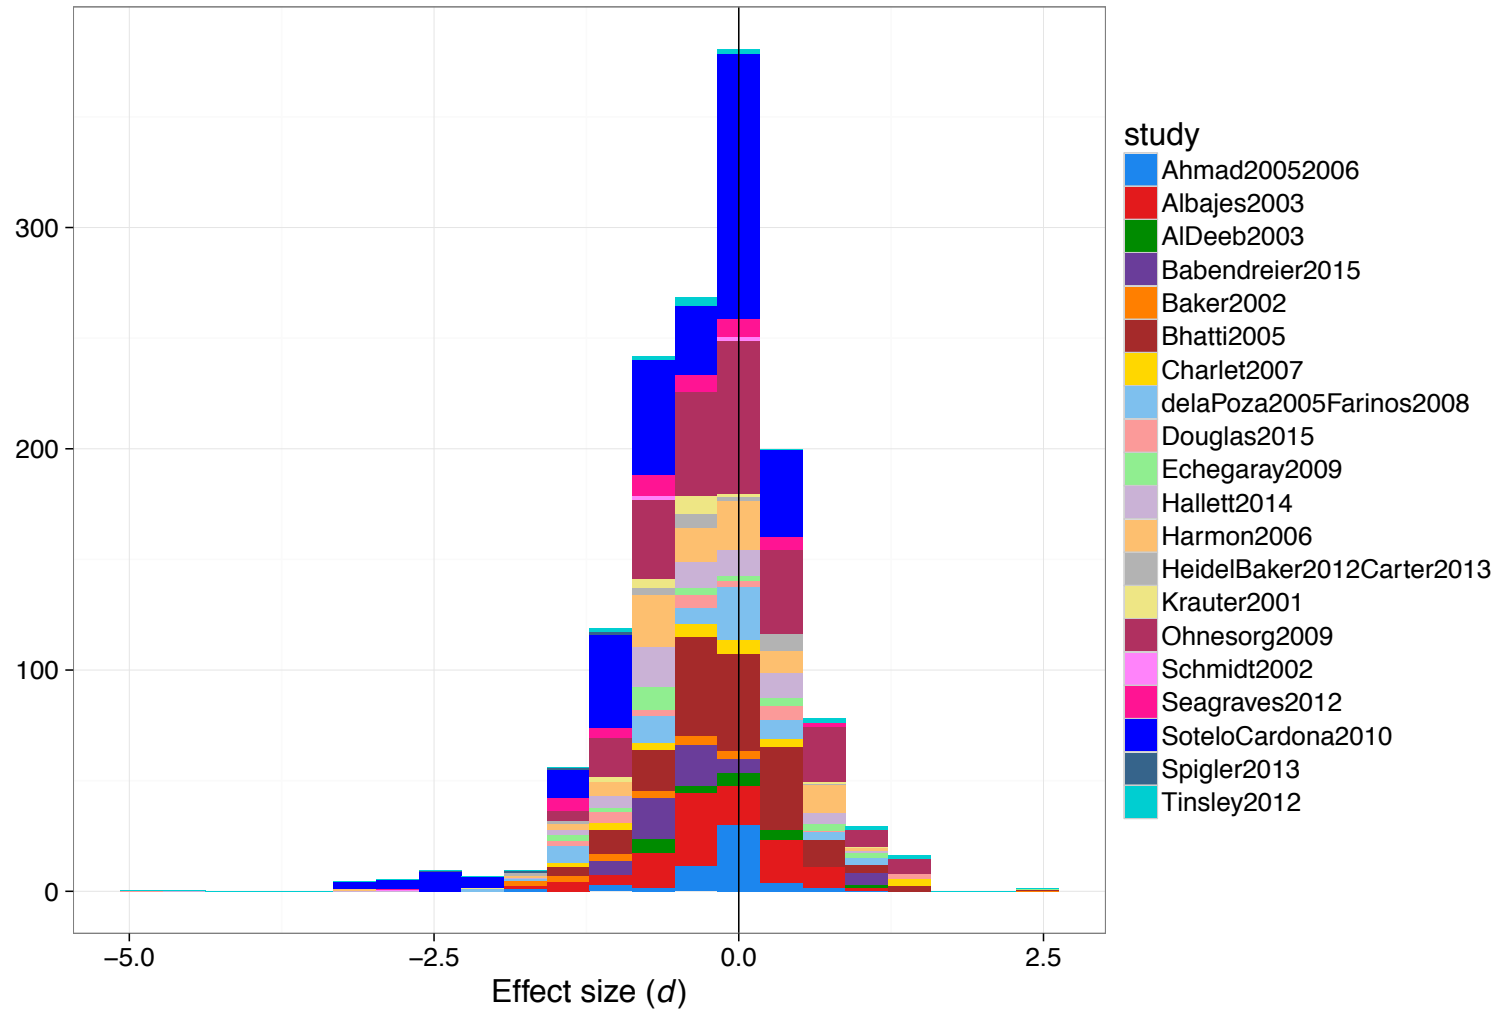

**Figure S1.** Weighted histogram for the effect of seed-applied neonicotinoids on natural enemies (relative to no-insecticide controls), color-coded by study ( $n = 607$  observations from 56 site-years and 20 studies).

Supplemental Results

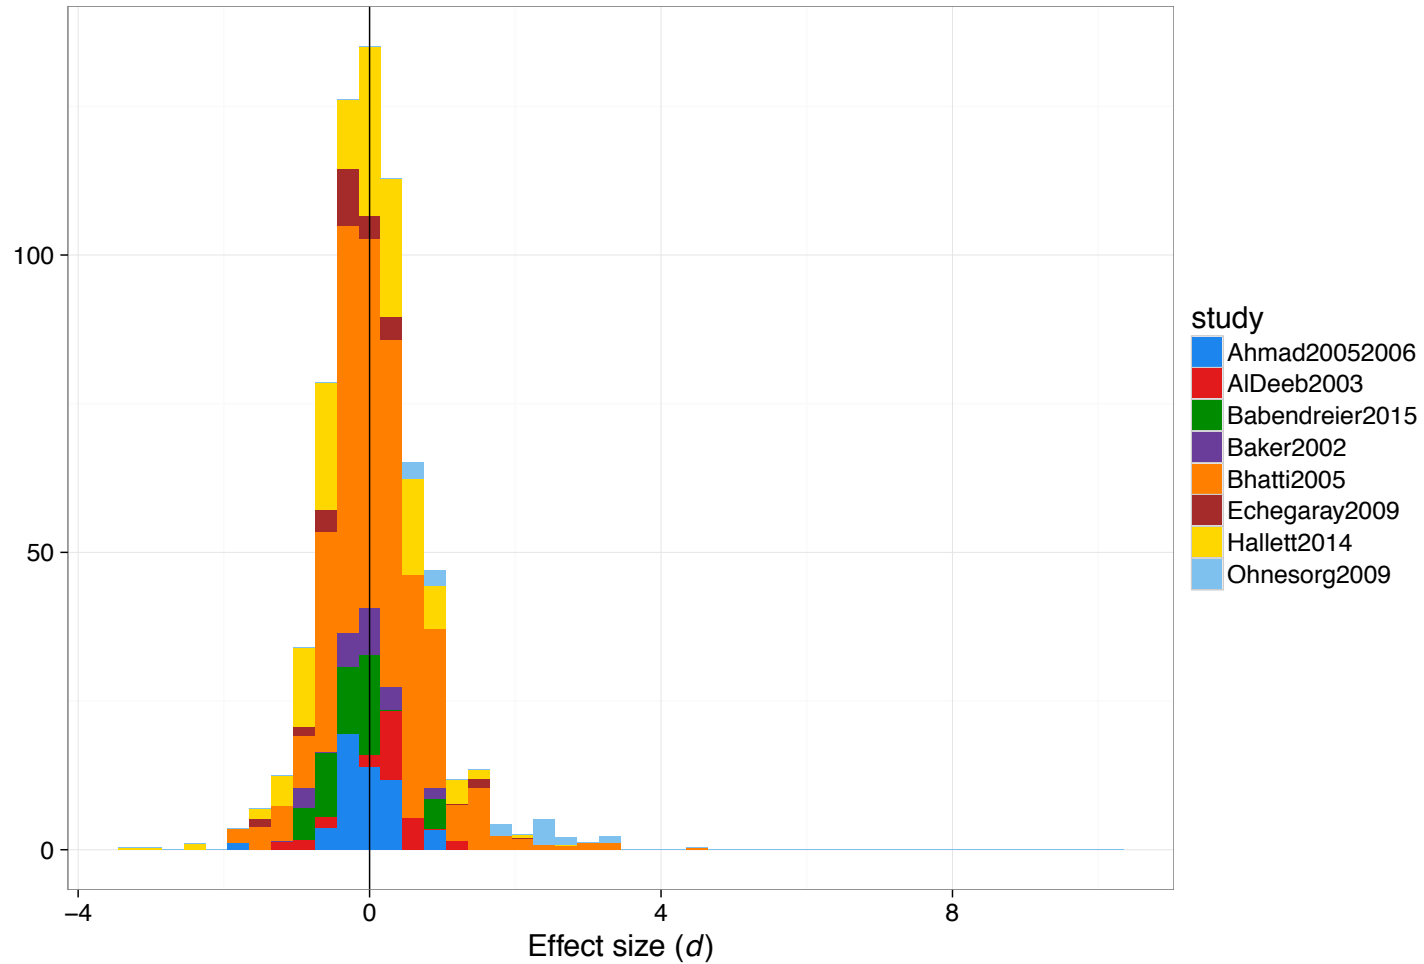

**Figure S2.** Weighted histogram for the effect of seed-applied neonicotinoids on natural enemies (relative to pyrethroid controls), color-coded by study ( $n = 384$  observations from 15 site-years and 8 studies).

Supplemental Results

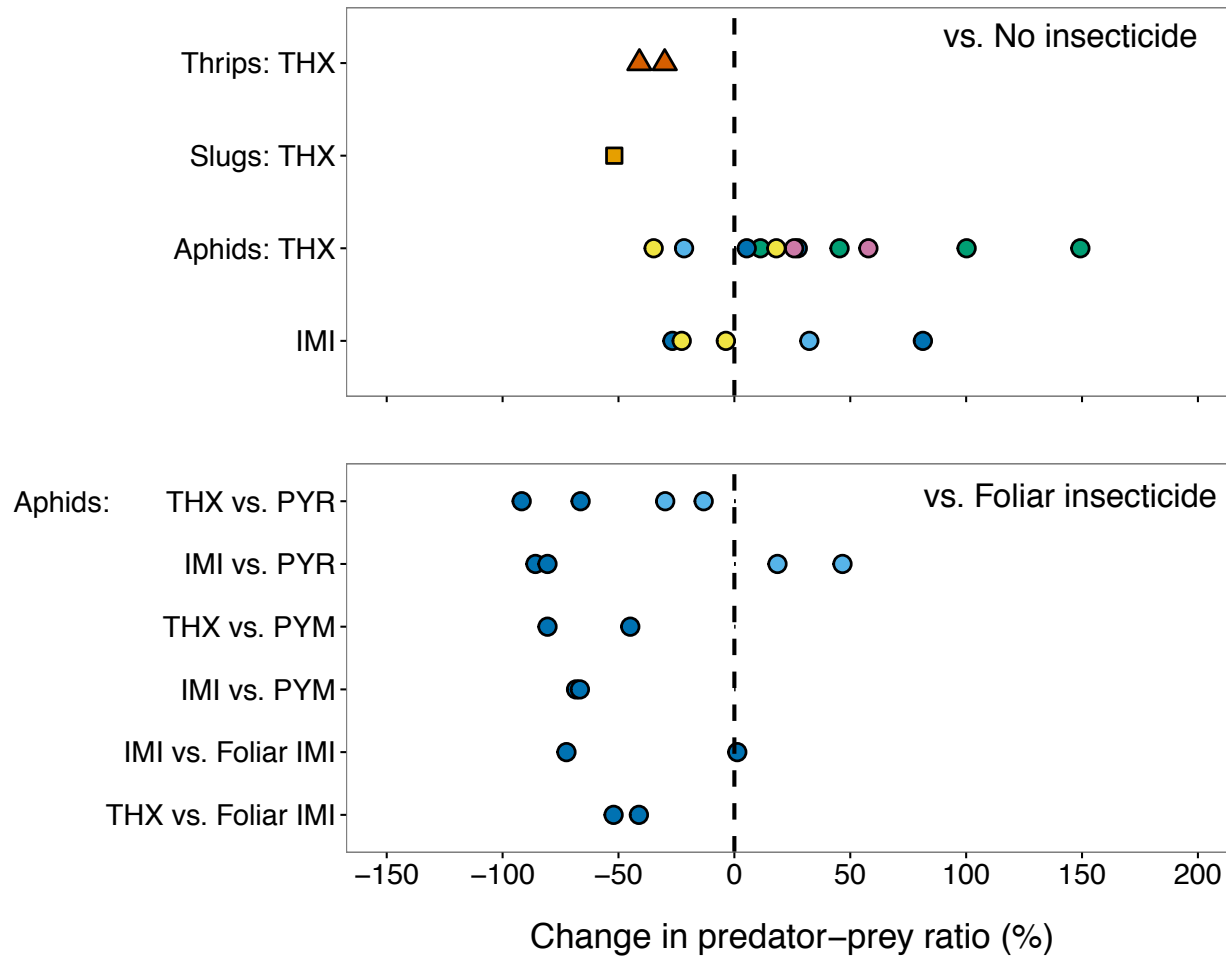

**Figure S3.** Change in predator-prey ratio (PP) as a result of seed-applied neonicotinoids, relative to control plots treated with either no insecticide or a foliar insecticide (calculated as  $100\% \times (PP_{\text{Neonic}} - PP_{\text{Control}})/PP_{\text{Control}}$ ). Each point represents a treatment comparison within a given study; negative values indicate that predator-prey ratios were lower in the neonicotinoid-treated plots versus controls, while positive values indicate the opposite. Points with the same color were derived from the same study. PYR = pyrethroid, PYM = pymetrozine, IMI = imidacloprid, and THX = thiamethoxam.

Supplemental References S1

- Ahmad A, Wilde GE, Whitworth RJ, and Zolnerowich G. 2006. Effect of corn hybrids expressing the coleopteran-specific Cry3Bb1 protein for corn rootworm control on aboveground insect predators. *Journal of Economic Entomology* 99:1085-1095.
- Ahmad A, Wilde GE, and Zhu KY. 2005. Detectability of coleopteran-specific Cry3Bb1 protein in soil and its effect on nontarget surface and below-ground arthropods. *Environmental Entomology* 34:385-394.
- Al-Deeb MA, and Wilde GE. 2003. Effect of *Bt* corn expressing the Cry3Bb1 toxin for corn rootworm control on aboveground nontarget arthropods. *Environmental Entomology* 32:1164-1170.
- Al-Deeb MA, Wilde GE, Blair JM, and Todd TC. 2003. Effect of *Bt* corn for corn rootworm control on nontarget soil microarthropods and nematodes. *Environmental Entomology* 32:859-865.
- Albajes R, Lopez C, and Pons X. 2003. Predatory fauna in cornfields and response to imidacloprid seed treatment. *Journal of Economic Entomology* 96:1805-1813.
- Babendreier D, Jeanneret P, Pilz C, and Toepfer S. 2015. Non-target effects of insecticides, entomopathogenic fungi and nematodes applied against western corn rootworm larvae in maize. *Journal of Applied Entomology* 139:457-467.
- Baker P, Haylock LA, Gamer BH, Sands RJN, and Dewar AM. 2002. *The effects of insecticide seed treatments on beneficial invertebrates in sugar beet*. Farnham: British Crop Protection Council.
- Bhatti MA, Duan J, Head G, Jiang CJ, McKee MJ, Nickson TE, Pilcher CL, and Pilcher CD. 2005a. Field evaluation of the impact of corn rootworm (Coleoptera: Chrysomelidae)-protected *Bt* corn on ground-dwelling invertebrates. *Environmental Entomology* 34:1325-1335.
- Bhatti MA, Duan J, Head GP, Jiang CJ, McKee MJ, Nickson TE, Pilcher CL, and Pilcher CD. 2005b. Field evaluation of the impact of corn rootworm (Coleoptera : Chrysomelidae)-protected *Bt* corn on foliage-dwelling arthropods. *Environmental Entomology* 34:1336-1345.
- Carter ME. 2013. Functional response and the effects of insecticidal seed treatment on the soybean aphid parasitoid, *Binodoxys communis*. M.S. Thesis. University of Minnesota.
- Charlet LD, Aiken RM, Meyer RF, and Gebre-Amlak A. 2007. Impact of combining planting date and chemical control to reduce larval densities of stem-infesting pests of sunflower in the central plains. *Journal of Economic Entomology* 100:1248-1257.
- de la Poza M, Pons X, Farinós GP, López C, Ortego F, Eizaguirre M, Castanera P, and Albajes R. 2005. Impact of farm-scale *Bt* maize on abundance of predatory arthropods in Spain. *Crop Protection* 24:677-684.
- Douglas MR, Rohr JR, and Tooker JF. 2015. Neonicotinoid insecticide travels through a soil food chain, disrupting biological control of non-target pests and decreasing soya bean yield. *Journal of Applied Ecology* 52:250-260.
- Echegaray FJ. 2009. Environmental effects of insecticides on non target predator and parasitoid insects. M.S. Thesis. Royal Roads University.

## Supplemental Results

- Farinós GP, de la Poza M, Hernández-Crespo P, Ortego F, and Castañera P. 2008. Diversity and seasonal phenology of aboveground arthropods in conventional and transgenic maize crops in Central Spain. *Biological Control* 44:362-371.
- Hallett RH, Bahlai CA, Xue Y, and Schaafsma AW. 2014. Incorporating natural enemy units into a dynamic action threshold for the soybean aphid, *Aphis glycines* (Homoptera: Aphididae). *Pest Management Science* 70:879-888.
- Harmon HE. 2006. Non-target effects of clothianidin seed-treated corn on the invertebrate community. M.S. Thesis. Towson University.
- Heidel-Baker TT. 2012. Compatibility of soybean aphid integrated pest management strategies. Ph.D. Dissertation. University of Minnesota.
- Krauter PC, Sansone CG, and Heinz KM. 2001. Assessment of Gaucho (R) seed treatment effects on beneficial insect abundance in sorghum. *Southwestern Entomologist* 26:143-146.
- Ohnesorg WJ, Johnson KD, and O'Neal ME. 2009. Impact of reduced-risk insecticides on soybean aphid and associated natural enemies. *Journal of Economic Entomology* 102:1816-1826.
- Schmidt T, Schmuck R, and Maus C. 2002. Data variability in carabid field studies (Coleoptera: Carabidae) and how to deal with small-scaled inhomogeneities of environmental conditions. *Bulletin OILB/SROP* 25:37-42.
- Seagraves MP, and Lundgren JG. 2012. Effects of neonicotinoid seed treatments on soybean aphid and its natural enemies. *Journal of Pest Science* 85:125-132.
- Sotelo-Cardona PA. 2010. Interactions among biological control, cultural control and barley resistance to the Russian wheat aphid, *Diuraphis noxia* (Kurdjumov), in Colorado, Kansas and Nebraska. Ph.D. Dissertation. Kansas State University.
- Spigler MI. 2013. Effects of thiamethoxam seed treatments on nutritive sources available to *Orius insidiosus* say in Indiana soybean agroecosystems. M.S. Thesis. Purdue University.
- Tinsley NA, Steffey KL, Estes RE, Heeren JR, Gray ME, and Diers BW. 2012. Field-level effects of preventative management tactics on soybean aphids (*Aphis glycines* Matsumura) and their predators. *Journal of Applied Entomology* 135:361-371.
